# Supplementary material for: A qnr-plasmid allows aminoglycosides to induce SOS in Escherichia coli
Source: eLife. 2022 Jan 17;11:e69511. doi: 10.7554/eLife.69511 (PMC8789287; doi:10.7554/eLife.69511)
Supplement: Figure 1—source data 1. [file elife-69511-fig1-data1.xlsx]

## Sheet: plasmid by type of bacteria
Morganellaceae	40
E.coli	4
Others Enterobacterales	9

## Sheet: Type of plasmid like
pDIJ09-518a-like	43
p2007057-like	10
