# Supplementary material for: A qnr-plasmid allows aminoglycosides to induce SOS in Escherichia coli
Source: eLife. 2022 Jan 17;11:e69511. doi: 10.7554/eLife.69511 (PMC8789287; doi:10.7554/eLife.69511)
Supplement: Figure 2—figure supplement 1—source data 1. [file elife-69511-fig2-figsupp1-data1.xlsx]

## Sheet: assay-average 3 biological repl
	WT	SD_WT	WT/pDIJ09-518a	SD_WT/pDIJ	WT + TOB	SD_WT+TOB	WT/pDIJ09-518a + TOB	SD WT/pDIJ +TOB
00:00:05	-0.002	0.001	0.00066667	0.0004714	0.00825	0.010253	0.00975	0.0152028
01:30:05	0.0161667	0.00251661	0.0165	0	0.076	0.0912168	0.120167	0.151792
03:00:05	0.301667	0.0272274	0.260667	0.00754247	0.395167	0.183488	0.471	0.236583
04:30:05	0.810333	0.0412351	0.8955	0.0129636	0.799083	0.140596	0.90175	0.117969
06:00:06	1.11667	0.0321455	1.25217	0.00542115	1.01625	0.0324091	1.24058	0.0293449
07:30:06	1.29933	0.0430155	1.41033	0.00942809	1.16617	0.00117851	1.39633	0.0353553
09:00:06	1.312	0.0563205	1.40917	0.013435	1.27858	0.0486725	1.41292	0.0439585
10:30:06	1.28783	0.0572916	1.38467	0.0129636	1.28967	0.0478476	1.40133	0.0421907
12:00:11	1.26183	0.0572916	1.35867	0.0129636	1.2585	0.0329983	1.38617	0.0405408
13:30:05	1.24	0.0593043	1.33633	0.00659966	1.228	0.0325269	1.36717	0.0403051
15:00:05	1.205	0.0666858	1.3045	0.00589256	1.1985	0.0304056	1.34983	0.0393623
16:30:05	1.16167	0.0681347	1.26933	0.00848528	1.17517	0.0304056	1.3355	0.0388909
18:00:05	1.13267	0.0666658	1.24133	0.00094281	1.15533	0.0320555	1.32583	0.0403051
19:30:05	1.11667	0.0655922	1.2225	0.00589256	1.13967	0.0334697	1.31733	0.039598
21:00:05	1.10533	0.0657749	1.20683	0.0124922	1.12092	0.0265165	1.31125	0.0373588
22:30:05	1.09433	0.067471	1.19483	0.013435	1.109	0.0249844	1.305	0.0348839
23:45:05	1.08783	0.0689807	1.18717	0.0146135	1.10475	0.0241595	1.29842	0.0350018
