# Supplementary material for: A qnr-plasmid allows aminoglycosides to induce SOS in Escherichia coli
Source: eLife. 2022 Jan 17;11:e69511. doi: 10.7554/eLife.69511 (PMC8789287; doi:10.7554/eLife.69511)
Supplement: Figure 2—figure supplement 2—source data 1. [file elife-69511-fig2-figsupp2-data1.xlsx]

## Sheet: Prett_pDIJ09-518a
		Target gene	HKG	ΔCt	2^-ΔCt	2^-ΔCt moy	SD 2^-ΔCt	ΔΔCt	Fold change		MIN 2^-ΔCt	MAX 2^-ΔCt	MAX 2^-ΔΔCt	MIN 2^-ΔΔCt
		sulA	leuS						2^-ΔΔCt ou ratio des 2^-ΔCt
Calibrator	Prett/dij 1_1	21.16	24.16			5.63656
	Prett/dij 1_2	21.44	23.77
	Prett/dij 1_3	20.03	23.78
	replicat bio 1	20.8767	23.9033	-3.02667	8.14925
	Prett/dij 2_1	22.64	24.6
	Prett/dij 2_2	22.93	24.31
	Prett/dij 2_3	22.68	24.27
	replicat bio 2	22.75	24.3933	-1.64333	3.12387
Test 1	Prett/dij_TOB_1_1	20.55	23.16
	Prett/dij_TOB_1_2	20.45	23.17
	Prett/dij_TOB_1_3	20.55	23.53
	replicat bio 1	20.5167	23.2867	-2.77	6.82108			0.256667	0.83702
	Prett/dij_TOB_2_1	22.22	23.43
	Prett/dij_TOB_2_2	21.95	24.27
	Prett/dij_TOB_2_3	22.1	24.1
	replicat bio 2	22.09	23.9333	-1.84333	3.58838			-0.2	1.1487
Test 1	Prett/dij_MMC_1_1	19.38	23.56
	Prett/dij_MMC_1_2	19.33	24.06
	Prett/dij_MMC_1_3	19.62	23.28
	replicat bio 1	19.4433	23.6333	-4.19	18.2522			-1.16333	2.23974
	Prett/dij_MMC_2_1	21.65	24.85
	Prett/dij_MMC_2_2	21.2	23.9
	Prett/dij_MMC_2_3	20.7	24.94
	replicat bio 2	21.1833	24.5633	-3.38	10.4107			-1.73667	3.33264
