# Supplementary material for: A qnr-plasmid allows aminoglycosides to induce SOS in Escherichia coli
Source: eLife. 2022 Jan 17;11:e69511. doi: 10.7554/eLife.69511 (PMC8789287; doi:10.7554/eLife.69511)
Supplement: Figure 2—source data 1. [file elife-69511-fig2-data1.xlsx]

## Sheet: WT_pDIJ_TOB vs LB
		Target gene	HKG	ΔCt	2^-ΔCt	2^-ΔCt moy	SD 2^-ΔCt	ΔΔCt	Fold change	MIN 2^-ΔΔCt
		qnrD	dxs						2^-ΔΔCt
Calibrator	WT/pDIJ_LB 1	28.91	21.01			0.00310635
	WT/pDIJ_LB 2	28.42	21.2
	WT/pDIJ_LB 3	29.4	20.82
	replicat bio 1	28.91	21.01	7.9	0.00418662
	WT/pDIJ_LB 4	29.67	20.09
	WT/pDIJ_LB 5	29.91	20.15
	WT/pDIJ_LB 6	29.43	20.03
	replicat bio 2	29.67	20.09	9.58	0.00130657
	WT/pDIJ_LB 7	29.02	20.99
	WT/pDIJ_LB 8	29.73	20.54
	WT/pDIJ_LB 9	28.31	21.44
	replicat bio 3	29.02	20.99	8.03	0.00382586
	WT/pDIJ_LB 10	29.12	21.19
	WT/pDIJ_LB 11	29.83	20.44
	WT/pDIJ_LB 12	28.21	21.34
	replicat bio 4	29.0533	20.99	8.06333	0.00373848
	WT/pDIJ_LB 13	29.12	20.87
	WT/pDIJ_LB 14	29.23	21.08
	WT/pDIJ_LB 15	29.14	20.36
	replicat bio 5	29.1633	20.77	8.39333	0.0029741
	WT/pDIJ_LB 16	29.02	20.72
	WT/pDIJ_LB 17	29.19	20.73
	WT/pDIJ_LB 18	29.28	20.83
	replicat bio 6	29.1633	20.76	8.40333	0.00295355
Test 1	WT/pDIJ_TOB 1	28.4	21.99
	WT/pDIJ_TOB 2	28.8	22.03
	WT/pDIJ_TOB 3	28.02	21.95
	replicat bio 1	28.4067	21.99	6.41667	0.0117055			-1.48333	2.79594
	WT/pDIJ_TOB 4	28.76	20.89
	WT/pDIJ_TOB 5	28.42	20.61
	WT/pDIJ_TOB 6	27.92	20.17
	replicat bio 2	28.3667	20.5567	7.81	0.00445611			-1.77	3.41054
	WT/pDIJ_TOB 7	28.94	22.04
	WT/pDIJ_TOB 8	28.62	21.46
	WT/pDIJ_TOB 9	28.84	21.93
	replicat bio 3	28.8	21.81	6.99	0.00786684			-1.04	2.05623
	WT/pDIJ_TOB 10	27.94	21.19
	WT/pDIJ_TOB 11	27.75	21.46
	WT/pDIJ_TOB 12	27.13	20.93
	replicat bio 4	27.6067	21.1933	6.41333	0.0117326			-1.65	3.13834
	WT/pDIJ_TOB 13	27.98	21.37
	WT/pDIJ_TOB 14	28.34	21.42
	WT/pDIJ_TOB 15	28.52	21.34
	replicat bio 5	28.28	21.3767	6.90333	0.00835391			-1.49	2.80889
	WT/pDIJ_TOB 16	28.3	21.28
	WT/pDIJ_TOB 17	28.27	21.36
	WT/pDIJ_TOB 18	28.24	21.42
	replicat bio 6	28.27	21.3533	6.91667	0.00827706			-1.48667	2.80241

## Sheet: WT_pDIJ_MMC vs LB
		Target gene	HKG	ΔCt	2^-ΔCt	2^-ΔCt moy	SD 2^-ΔCt	ΔΔCt	Fold change
		qnrD	dxs						2^-ΔΔCt
Calibrator	WT/pDIJ_LB 1	28.91	21.01			0.00310635
	WT/pDIJ_LB 2	28.42	21.2
	WT/pDIJ_LB 3	29.4	20.82
	replicat bio 1	28.91	21.01	7.9	0.00418662
	WT/pDIJ_LB 4	29.67	20.09
	WT/pDIJ_LB 5	29.91	20.15
	WT/pDIJ_LB 6	29.43	20.03
	replicat bio 2	29.67	20.09	9.58	0.00130657
	WT/pDIJ_LB 7	29.02	20.99
	WT/pDIJ_LB 8	29.73	20.54
	WT/pDIJ_LB 9	28.31	21.44
	replicat bio 3	29.02	20.99	8.03	0.00382586
	WT/pDIJ_LB 10	29.12	21.19
	WT/pDIJ_LB 11	29.83	20.44
	WT/pDIJ_LB 12	28.21	21.34
	replicat bio 4	29.0533	20.99	8.06333	0.00373848
	WT/pDIJ_LB 13	29.12	20.87
	WT/pDIJ_LB 14	29.23	21.08
	WT/pDIJ_LB 15	29.14	20.36
	replicat bio 5	29.1633	20.77	8.39333	0.0029741
	WT/pDIJ_LB 16	29.02	20.72
	WT/pDIJ_LB 17	29.19	20.73
	WT/pDIJ_LB 18	29.28	20.83
	replicat bio 6	29.1633	20.76	8.40333	0.00295355
Test 1	WT/pDIJ_MMC 1	28.18	21.34
	WT/pDIJ_MMC 2	28.14	21.35
	WT/pDIJ_MMC 3	28.12	21.33
	replicat bio 1	28.1467	21.34	6.80667	0.00893283			-1.09333	2.13366
	WT/pDIJ_MMC 4	29.14	21.14
	WT/pDIJ_MMC 5	29.15	21.15
	WT/pDIJ_MMC 6	29.13	21.13
	replicat bio 2	29.14	21.14	8	0.00390625			-1.58	2.9897
	WT/pDIJ_MMC 7	28.02	20.99
	WT/pDIJ_MMC 8	27.98	20.99
	WT/pDIJ_MMC 9	27.88	20.97
	replicat bio 3	27.96	20.9833	6.97667	0.00793988			-1.05333	2.07532
	WT/pDIJ_MMC 10	28.22	21.14
	WT/pDIJ_MMC 11	28.08	21.22
	WT/pDIJ_MMC 12	28.14	21.08
	replicat bio 4	28.1467	21.1467	7	0.0078125			-1.06333	2.08975
	WT/pDIJ_MMC 13	28.39	21.04
	WT/pDIJ_MMC 14	28.33	21.26
	WT/pDIJ_MMC 15	28.34	21.17
	replicat bio 5	28.3533	21.1567	7.19667	0.00681691			-1.19667	2.29209
	WT/pDIJ_MMC 16	27.91	20.73
	WT/pDIJ_MMC 17	27.77	20.72
	WT/pDIJ_MMC 18	27.94	20.63
	replicat bio 6	27.8733	20.6933	7.18	0.00689612			-1.22333	2.33486

## Sheet: WT_pDIJ_CIP vs LB
		Target gene	HKG	ΔCt	2^-ΔCt	2^-ΔCt moy	SD 2^-ΔCt	ΔΔCt	Fold change
		qnrD	dxs						2^-ΔΔCt
Calibrator	WT/pDIJ_LB 1	28.91	21.01			0.00310635
	WT/pDIJ_LB 2	28.42	21.2
	WT/pDIJ_LB 3	29.4	20.82
	replicat bio 1	28.91	21.01	7.9	0.00418662
	WT/pDIJ_LB 4	29.67	20.09
	WT/pDIJ_LB 5	29.91	20.15
	WT/pDIJ_LB 6	29.43	20.03
	replicat bio 2	29.67	20.09	9.58	0.00130657
	WT/pDIJ_LB 7	29.02	20.99
	WT/pDIJ_LB 8	29.73	20.54
	WT/pDIJ_LB 9	28.31	21.44
	replicat bio 3	29.02	20.99	8.03	0.00382586
	WT/pDIJ_LB 10	29.12	21.19
	WT/pDIJ_LB 11	29.83	20.44
	WT/pDIJ_LB 12	28.21	21.34
	replicat bio 4	29.0533	20.99	8.06333	0.00373848
	WT/pDIJ_LB 13	29.12	20.87
	WT/pDIJ_LB 14	29.23	21.08
	WT/pDIJ_LB 15	29.14	20.36
	replicat bio 5	29.1633	20.77	8.39333	0.0029741
	WT/pDIJ_LB 16	29.02	20.72
	WT/pDIJ_LB 17	29.19	20.73
	WT/pDIJ_LB 18	29.28	20.83
	replicat bio 6	29.1633	20.76	8.40333	0.00295355
Test 1	WT/pDIJ_CIP 1	28.16	20.6
	WT/pDIJ_CIP 2	28.12	21.41
	WT/pDIJ_CIP 3	28.02	21.79
	replicat bio 1	28.1	21.2667	6.83333	0.00876923			-1.06667	2.09459
	WT/pDIJ_CIP 4	28.91	20.62
	WT/pDIJ_CIP 5	29.2	20.89
	WT/pDIJ_CIP 6	29.02	21.31
	replicat bio 2	29.0433	20.94	8.10333	0.00363625			-1.47667	2.78305
	WT/pDIJ_CIP 7	28.31	21.18
	WT/pDIJ_CIP 8	28.14	21.2
	WT/pDIJ_CIP 9	28.02	21.22
	replicat bio 3	28.1567	21.2	6.95667	0.00805072			-1.07333	2.10429
	WT/pDIJ_CIP 10	28.19	21.02
	WT/pDIJ_CIP 11	28.12	21.03
	WT/pDIJ_CIP 12	28.45	21.32
	replicat bio 4	28.2533	21.1233	7.13	0.00713931			-0.933333	1.90968
	WT/pDIJ_CIP 13	28.39	20.97
	WT/pDIJ_CIP 14	28.33	21.14
	WT/pDIJ_CIP 15	28.37	21.21
	replicat bio 5	28.3633	21.1067	7.25667	0.00653922			-1.13667	2.19872
	WT/pDIJ_CIP 16	29.08	21.64
	WT/pDIJ_CIP 17	28.78	21.45
	WT/pDIJ_CIP 18	28.87	21.67
	replicat bio 6	28.91	21.5867	7.32333	0.00624392			-1.08	2.11404

## Sheet: DrecA_pDIJ_TOB vs LB
		Target gene	HKG	ΔCt	2^-ΔCt	2^-ΔCt moy	SD 2^-ΔCt	ΔΔCt	Fold change
		qnrD	dxs						2^-ΔΔCt
Calibrator	ΔrecA/pDIJ_LB 1	18.67	24			61.7002
	ΔrecA/pDIJ_LB 2	18.81	24.1
	ΔrecA/pDIJ_LB 3	18.53	23.9
	replicat bio 1	18.67	24	-5.33	40.2244
	ΔrecA/pDIJ_LB 4	17.57	23.21
	ΔrecA/pDIJ_LB 5	17.46	22.86
	ΔrecA/pDIJ_LB 6	17.68	23.56
	replicat bio 2	17.57	23.21	-5.64	49.8665
	ΔrecA/pDIJ_LB 7	18	24.57
	ΔrecA/pDIJ_LB 8	18.12	25.02
	ΔrecA/pDIJ_LB 9	17.88	24.12
	replicat bio 3	18	24.57	-6.57	95.0095
	ΔrecA/pDIJ_LB 10	18.77	23.98
	ΔrecA/pDIJ_LB 11	18.72	24.05
	ΔrecA/pDIJ_LB 12	18.52	24.06
	replicat bio 4	18.67	24.03	-5.36	41.0696
	ΔrecA/pDIJ_LB 13	17.53	21.29
	ΔrecA/pDIJ_LB 14	17.57	21.18
	ΔrecA/pDIJ_LB 15	17.62	21.17
	replicat bio 5	17.5733	21.2133	-3.64	12.4666
	ΔrecA/pDIJ_LB 16	18.08	23.57
	ΔrecA/pDIJ_LB 17	18.18	23.29
	ΔrecA/pDIJ_LB 18	18.03	23.33
	replicat bio 6	18.0967	23.3967	-5.3	39.3966
Test 1	ΔrecA/pDIJ_TOB 1	19.46	24.62
	ΔrecA/pDIJ_TOB 2	19.25	24.95
	ΔrecA/pDIJ_TOB 3	19.67	24.29
	replicat bio 1	19.46	24.62	-5.16	35.7532			0.17	0.888843
	ΔrecA/pDIJ_TOB 4	20.46	25.97
	ΔrecA/pDIJ_TOB 5	20.5	25.92
	ΔrecA/pDIJ_TOB 6	20.42	26.02
	replicat bio 2	20.46	25.97	-5.51	45.5696			0.13	0.913831
	ΔrecA/pDIJ_TOB 7	18.75	22.79
	ΔrecA/pDIJ_TOB 8	18.72	22.75
	ΔrecA/pDIJ_TOB 9	18.79	22.84
	replicat bio 3	18.7533	22.7933	-4.04	16.4498			2.53	0.173139
	ΔrecA/pDIJ_TOB 10	20.36	25.63
	ΔrecA/pDIJ_TOB 11	20.62	25.62
	ΔrecA/pDIJ_TOB 12	20.44	25.81
	replicat bio 4	20.4733	25.6867	-5.21333	37.0996			0.146667	0.903335
	ΔrecA/pDIJ_TOB 13	18.75	22.2
	ΔrecA/pDIJ_TOB 14	18.72	22.14
	ΔrecA/pDIJ_TOB 15	18.79	22.18
	replicat bio 5	18.7533	22.1733	-3.42	10.7034			0.22	0.858565
	ΔrecA/pDIJ_TOB 16	19.71	24.11
	ΔrecA/pDIJ_TOB 17	19.43	24.14
	ΔrecA/pDIJ_TOB 18	19.58	24.45
	replicat bio 6	19.5733	24.2333	-4.66	25.2813			0.64	0.641713

## Sheet: DrecA_pDIJ_CIP vs LB
		Target gene	HKG	ΔCt	2^-ΔCt	2^-ΔCt moy	SD 2^-ΔCt	ΔΔCt	Fold change
		qnrD	dxs						2^-ΔΔCt
Calibrator	ΔrecA/pDIJ_LB 1	18.67	24			61.7002
	ΔrecA/pDIJ_LB 2	18.81	24.1
	ΔrecA/pDIJ_LB 3	18.53	23.9
	replicat bio 1	18.67	24	-5.33	40.2244
	ΔrecA/pDIJ_LB 4	17.57	23.21
	ΔrecA/pDIJ_LB 5	17.46	22.86
	ΔrecA/pDIJ_LB 6	17.68	23.56
	replicat bio 2	17.57	23.21	-5.64	49.8665
	ΔrecA/pDIJ_LB 7	18	24.57
	ΔrecA/pDIJ_LB 8	18.12	25.02
	ΔrecA/pDIJ_LB 9	17.88	24.12
	replicat bio 3	18	24.57	-6.57	95.0095
	ΔrecA/pDIJ_LB 10	18.77	23.98
	ΔrecA/pDIJ_LB 11	18.72	24.05
	ΔrecA/pDIJ_LB 12	18.52	24.06
	replicat bio 4	18.67	24.03	-5.36	41.0696
	ΔrecA/pDIJ_LB 13	17.53	21.29
	ΔrecA/pDIJ_LB 14	17.57	21.18
	ΔrecA/pDIJ_LB 15	17.62	21.17
	replicat bio 5	17.5733	21.2133	-3.64	12.4666
	ΔrecA/pDIJ_LB 16	18.08	23.57
	ΔrecA/pDIJ_LB 17	18.18	23.29
	ΔrecA/pDIJ_LB 18	18.03	23.33
	replicat bio 6	18.0967	23.3967	-5.3	39.3966
Test 1	ΔrecA/pDIJ_CIP 1	19.22	24.03
	ΔrecA/pDIJ_CIP 2	20.14	24.71
	ΔrecA/pDIJ_CIP 3	18.3	23.35
	replicat bio 1	19.22	24.03	-4.81	28.0514			0.52	0.697372
	ΔrecA/pDIJ_CIP 4	17.02	21.34
	ΔrecA/pDIJ_CIP 5	17.02	21.09
	ΔrecA/pDIJ_CIP 6	17.04	21.59
	replicat bio 2	17.0267	21.34	-4.31333	19.8812			1.32667	0.398688
	ΔrecA/pDIJ_CIP 7	16.88	21.756
	ΔrecA/pDIJ_CIP 8	16.74	21.186
	ΔrecA/pDIJ_CIP 9	16.98	22.317
	replicat bio 3	16.8667	21.753	-4.88633	29.5756			1.68367	0.31129
	ΔrecA/pDIJ_CIP 10	20.46	25.95
	ΔrecA/pDIJ_CIP 11	20.5	26.04
	ΔrecA/pDIJ_CIP 12	20.42	26.02
	replicat bio 4	20.46	26.0033	-5.54333	46.6347			-0.183333	1.1355
	ΔrecA/pDIJ_CIP 13	20.22	22.88
	ΔrecA/pDIJ_CIP 14	17.93	21.34
	ΔrecA/pDIJ_CIP 15	17.183	21.753
	replicat bio 5	18.4443	21.991	-3.54667	11.6857			0.0933333	0.937354
	ΔrecA/pDIJ_CIP 16	18.87	23.23
	ΔrecA/pDIJ_CIP 17	18.25	23.18
	ΔrecA/pDIJ_CIP 18	18.26	23.24
	replicat bio 6	18.46	23.2167	-4.75667	27.0333			0.543333	0.686184

## Sheet: DrecA_pDIJ_MMC vs LB
		Target gene	HKG	ΔCt	2^-ΔCt	2^-ΔCt moy	SD 2^-ΔCt	ΔΔCt	Fold change
		qnrD	dxs						2^-ΔΔCt
Calibrator	ΔrecA/pDIJ_LB 1	18.67	24			61.7002
	ΔrecA/pDIJ_LB 2	18.81	24.1
	ΔrecA/pDIJ_LB 3	18.53	23.9
	replicat bio 1	18.67	24	-5.33	40.2244
	ΔrecA/pDIJ_LB 4	17.57	23.21
	ΔrecA/pDIJ_LB 5	17.46	22.86
	ΔrecA/pDIJ_LB 6	17.68	23.56
	replicat bio 2	17.57	23.21	-5.64	49.8665
	ΔrecA/pDIJ_LB 7	18	24.57
	ΔrecA/pDIJ_LB 8	18.12	25.02
	ΔrecA/pDIJ_LB 9	17.88	24.12
	replicat bio 3	18	24.57	-6.57	95.0095
	ΔrecA/pDIJ_LB 10	18.77	23.98
	ΔrecA/pDIJ_LB 11	18.72	24.05
	ΔrecA/pDIJ_LB 12	18.52	24.06
	replicat bio 4	18.67	24.03	-5.36	41.0696
	ΔrecA/pDIJ_LB 13	17.53	21.29
	ΔrecA/pDIJ_LB 14	17.57	21.18
	ΔrecA/pDIJ_LB 15	17.62	21.17
	replicat bio 5	17.5733	21.2133	-3.64	12.4666
	ΔrecA/pDIJ_LB 16	18.08	23.57
	ΔrecA/pDIJ_LB 17	18.18	23.29
	ΔrecA/pDIJ_LB 18	18.03	23.33
	replicat bio 6	18.0967	23.3967	-5.3	39.3966
Test 1	ΔrecA/pDIJ_MMC 1	19.15	24.14
	ΔrecA/pDIJ_MMC 2	19.26	24.49
	ΔrecA/pDIJ_MMC 3	19.04	23.79
	replicat bio 1	19.15	24.14	-4.99	31.779			0.34	0.790041
	ΔrecA/pDIJ_MMC 4	16.49	21.5
	ΔrecA/pDIJ_MMC 5	16.73	21.98
	ΔrecA/pDIJ_MMC 6	16.25	21.02
	replicat bio 2	16.49	21.5	-5.01	32.2226			0.63	0.646176
	ΔrecA/pDIJ_MMC 7	16.83	22.47
	ΔrecA/pDIJ_MMC 8	16.87	22.33
	ΔrecA/pDIJ_MMC 9	17.12	22.55
	replicat bio 3	16.94	22.45	-5.51	45.5696			1.06	0.479632
	ΔrecA/pDIJ_MMC 10	17.42	22.98
	ΔrecA/pDIJ_MMC 11	17.61	22.63
	ΔrecA/pDIJ_MMC 12	17.56	22.59
	replicat bio 4	17.53	22.7333	-5.20333	36.8434			0.156667	0.897095
	ΔrecA/pDIJ_MMC 13	17.58	21.02
	ΔrecA/pDIJ_MMC 14	17.46	21.5
	ΔrecA/pDIJ_MMC 15	17.88	21.2
	replicat bio 5	17.64	21.24	-3.6	12.1257			0.04	0.972655
	ΔrecA/pDIJ_MMC 16	17.52	22.22
	ΔrecA/pDIJ_MMC 17	17.8	22.53
	ΔrecA/pDIJ_MMC 18	17.33	22.46
	replicat bio 6	17.55	22.4033	-4.85333	28.9067			0.446667	0.733736

## Sheet: recA_pDIJ-pRecA_TOB vs LB
		Target gene	HKG	ΔCt	2^-ΔCt	2^-ΔCt moy	SD 2^-ΔCt	ΔΔCt	Fold change
		qnrD	dxs						2^-ΔΔCt
Calibrator	ΔrecA/pDIJ/pRecA_LB 1_1	11.93	18.57
	ΔrecA/pDIJ/pRecA_LB 1_2	13.54	18.48
	ΔrecA/pDIJ/pRecA_LB 1_3	12.43	18.62
	replicat bio 1	12.6333	18.5567	-5.92333	60.6877
	ΔrecA/pDIJ/pRecA_LB 2_1	12.88	18.52
	ΔrecA/pDIJ/pRecA_LB 2_2	12.75	18.49
	ΔrecA/pDIJ/pRecA_LB 2_3	12.95	18.46
	replicat bio 2	12.86	18.49	-5.63	49.5221
Test 1	ΔrecA/pDIJ/pRecA_TOB 1_1	12.53	19.76
	ΔrecA/pDIJ/pRecA_TOB 1_2	11.91	19.56
	ΔrecA/pDIJ/pRecA_TOB 1_3	12.7	19.52
	replicat bio 1	12.38	19.6133	-7.23333	150.47			-1.31	2.47942
	ΔrecA/pDIJ/pRecA_TOB 2_1	13.29	19.7
	ΔrecA/pDIJ/pRecA_TOB 2_2	12.9	19.71
	ΔrecA/pDIJ/pRecA_TOB 2_3	12.83	19.62
	replicat bio 2	13.0067	19.6767	-6.67	101.829			-1.04	2.05623

## Sheet: recA_pDIJ_pRecA CIP vs LB
		Target gene	HKG	ΔCt	2^-ΔCt	2^-ΔCt moy	SD 2^-ΔCt	ΔΔCt	Fold change
		qnrD	dxs						2^-ΔΔCt
Calibrator	ΔrecA/pDIJ/pRecA_LB 1_1	11.93	18.57
	ΔrecA/pDIJ/pRecA_LB 1_2	13.54	18.48
	ΔrecA/pDIJ/pRecA_LB 1_3	12.43	18.62
	replicat bio 1	12.6333	18.5567	-5.92333	60.6877
	ΔrecA/pDIJ/pRecA_LB 2_1	12.88	18.52
	ΔrecA/pDIJ/pRecA_LB 2_2	12.75	18.49
	ΔrecA/pDIJ/pRecA_LB 2_3	12.95	18.46
	replicat bio 2	12.86	18.49	-5.63	49.5221
Test 1	ΔrecA/pDIJ/pRecA_CIP 1_1	12.58	19.44
	ΔrecA/pDIJ/pRecA_CIP 1_2	12.57	19.35
	ΔrecA/pDIJ/pRecA_CIP 1_3	12.78	19.52
	replicat bio 1	12.6433	19.4367	-6.79333	110.917			-0.87	1.82766
	ΔrecA/pDIJ/pRecA_CIP 2_1	12.77	19.53
	ΔrecA/pDIJ/pRecA_CIP 2_2	12.69	19.7
	ΔrecA/pDIJ/pRecA_CIP 2_3	12.31	19.85
	replicat bio 2	12.59	19.6933	-7.10333	137.504			-1.47333	2.77663

## Sheet: recA_pDIJ_pRecA MMC vs LB
		Target gene	HKG	ΔCt	2^-ΔCt	2^-ΔCt moy	SD 2^-ΔCt	ΔΔCt	Fold change
		qnrD	dxs						2^-ΔΔCt
Calibrator	ΔrecA/pDIJ/pRecA_LB 1_1	11.93	18.57
	ΔrecA/pDIJ/pRecA_LB 1_2	13.54	18.48
	ΔrecA/pDIJ/pRecA_LB 1_3	12.43	18.62
	replicat bio 1	12.6333	18.5567	-5.92333	60.6877
	ΔrecA/pDIJ/pRecA_LB 2_1	12.88	18.52
	ΔrecA/pDIJ/pRecA_LB 2_2	12.75	18.49
	ΔrecA/pDIJ/pRecA_LB 2_3	12.95	18.46
	replicat bio 2	12.86	18.49	-5.63	49.5221
Test 1	ΔrecA/pDIJ/pRecA_MMC 1_1	11.39	19.51
	ΔrecA/pDIJ/pRecA_MMC 1_2	11.86	19.71
	ΔrecA/pDIJ/pRecA_MMC 1_3	12.31	19.43
	replicat bio 1	11.8533	19.55	-7.69667	207.457			-1.77333	3.41843
	ΔrecA/pDIJ/pRecA_MMC 2_1	12.25	19.44
	ΔrecA/pDIJ/pRecA_MMC 2_2	12.4	19.36
	ΔrecA/pDIJ/pRecA_MMC 2_3	12.28	19.35
	replicat bio 2	12.31	19.3833	-7.07333	134.675			-1.44333	2.71948

## Sheet: lexAind_pDIJ_TOB vs LB
		Target gene	HKG	ΔCt	2^-ΔCt	2^-ΔCt moy	SD 2^-ΔCt	ΔΔCt	Fold change
		qnrD	dxs						2^-ΔΔCt
Calibrator	lexAind/pDIJ_LB 1	15.24	22.14
	lexAind/pDIJ_LB 2	15.34	21.85
	lexAind/pDIJ_LB 3	15.28	22.43
	replicat bio 1	15.2867	22.14	-6.85333	115.627
	lexAind/pDIJ_LB 4	13.787	21.17
	lexAind/pDIJ_LB 5	14.12	20.8
	lexAind/pDIJ_LB 6	13.45	21.54
	replicat bio 2	13.7857	21.17	-7.38433	167.073
	lexAind/pDIJ_LB 7	14.45	22.29
	lexAind/pDIJ_LB 8	14.64	22.07
	lexAind/pDIJ_LB 9	14.26	22.51
	replicat bio 3	14.45	22.29	-7.84	229.126
	lexAind/pDIJ_LB 10	14.86	22.14
	lexAind/pDIJ_LB 11	14.24	21.17
	lexAind/pDIJ_LB 12	14.45	22.29
	replicat bio 4	14.5167	21.8667	-7.35	163.144
	lexAind/pDIJ_LB 13	14.56	21.74
	lexAind/pDIJ_LB 14	14.53	21.92
	lexAind/pDIJ_LB 15	14.42	21.92
	replicat bio 5	14.5033	21.86	-7.35667	163.899
	lexAind/pDIJ_LB 16	14.99	22.37
	lexAind/pDIJ_LB 17	14.91	22.37
	lexAind/pDIJ_LB 18	14.15	21.67
	replicat bio 6	14.6833	22.1367	-7.45333	175.258
Test 1	lexAind/pDIJ_TOB 1	14.65	21.88
	lexAind/pDIJ_TOB 2	14.55	21.74
	lexAind/pDIJ_TOB 3	14.75	21.62
	replicat bio 1	14.65	21.7467	-7.09667	136.87			-0.243333	1.18372
	lexAind/pDIJ_TOB 4	14.95	21.89
	lexAind/pDIJ_TOB 5	14.97	21.91
	lexAind/pDIJ_TOB 6	14.93	21.87
	replicat bio 2	14.95	21.89	-6.94	122.786			0.444333	0.734924
	lexAind/pDIJ_TOB 7	15.52	22.72
	lexAind/pDIJ_TOB 8	15.3	22.46
	lexAind/pDIJ_TOB 9	15.74	22.98
	replicat bio 3	15.52	22.72	-7.2	147.033			0.64	0.641713
	lexAind/pDIJ_TOB 10	14.32	22.22
	lexAind/pDIJ_TOB 11	14.95	22.03
	lexAind/pDIJ_TOB 12	14.52	22.41
	replicat bio 4	14.5967	22.22	-7.62333	197.175			-0.273333	1.2086
	lexAind/pDIJ_TOB 13	15.03	22.32
	lexAind/pDIJ_TOB 14	14.87	22.17
	lexAind/pDIJ_TOB 15	15.06	22.13
	replicat bio 5	14.9867	22.2067	-7.22	149.086			0.136667	0.909618
	lexAind/pDIJ_TOB 16	14.78	22.28
	lexAind/pDIJ_TOB 17	14.87	22.23
	lexAind/pDIJ_TOB 18	14.98	22.04
	replicat bio 6	14.8767	22.1833	-7.30667	158.316			0.146667	0.903335

[truncated: 5 more sheets: lexAind_pDIJ_MMC vs LB, lexAind_pDIJ_CIP vs LB, WT_pDIJ_LexA_box_TOB vs LB, WT_pDIJ_LexA_box_MMC vs LB, WT_pDIJ_LexA_box_CIP vs LB]
