# Supplementary material for: A qnr-plasmid allows aminoglycosides to induce SOS in Escherichia coli
Source: eLife. 2022 Jan 17;11:e69511. doi: 10.7554/eLife.69511 (PMC8789287; doi:10.7554/eLife.69511)
Supplement: Figure 2—source data 2. [file elife-69511-fig2-data2.xlsx]

## Sheet: WT_TOB vs LB
		Target gene	HKG	ΔCt	2^-ΔCt	2^-ΔCt moy	SD 2^-ΔCt	ΔΔCt	Fold change
		sfiA	dxs						2^-ΔΔCt
Calibrator	WT_LB 1	22.45	19.61
	WT_LB 2	22.29	19.62
	WT_LB 3	22.46	19.63
	replicat bio 1	22.4	19.62	2.78	0.145592
	WT_LB 4	22.23	19.36
	WT_LB 5	22.26	19.46
	WT_LB 6	22.49	19.31
	replicat bio 2	22.3267	19.3767	2.95	0.129408
	WT_LB 7	22.23	19.56
	WT_LB 8	22.34	19.52
	WT_LB 9	22.36	19.52
	replicat bio 3	22.31	19.5333	2.77667	0.145928
	WT_LB 10	22.27	19.32
	WT_LB 11	22.27	19.34
	WT_LB 12	22.26	19.28
	replicat bio 4	22.2667	19.3133	2.95333	0.129109
	WT_LB 13	22.36	19.43
	WT_LB 14	22.38	19.54
	WT_LB 15	22.23	19.42
	replicat bio 5	22.3233	19.4633	2.86	0.137738
	WT_LB 16	22.43	19.47
	WT_LB 17	22.45	19.44
	WT_LB 18	22.22	19.58
	replicat bio 6	22.3667	19.4967	2.87	0.136787
Test 1	WT_TOB 1	21.98	19.22
	WT_TOB 2	22.04	19.44
	WT_TOB 3	22.32	19.32
	replicat bio 1	22.1133	19.3267	2.78667	0.14492			0.00666667	0.99539
	WT_TOB 4	21.2	19.28
	WT_TOB 5	22.3	19.68
	WT_TOB 6	22.82	19
	replicat bio 2	22.1067	19.32	2.78667	0.14492			-0.163333	1.11987
	WT_TOB 7	21.88	19.14
	WT_TOB 8	22.04	19.46
	WT_TOB 9	22.22	18.96
	replicat bio 3	22.0467	19.1867	2.86	0.137738			0.0833333	0.943874
	WT_TOB 10	21.32	18.98
	WT_TOB 11	22.18	19.02
	WT_TOB 12	22.84	18.87
	replicat bio 4	22.1133	18.9567	3.15667	0.112137			0.203333	0.868541
	WT_TOB 13	22.09	19.26
	WT_TOB 14	22.07	19.19
	WT_TOB 15	22.18	19.21
	replicat bio 5	22.1133	19.22	2.89333	0.134592			0.0333333	0.97716
	WT_TOB 16	21.35	18.18
	WT_TOB 17	21.08	18.34
	WT_TOB 18	21.17	18.38
	replicat bio 6	21.2	18.3	2.9	0.133972			0.03	0.97942

## Sheet: WT_MMC vs LB
		Target gene	HKG	ΔCt	2^-ΔCt	2^-ΔCt moy	SD 2^-ΔCt	ΔΔCt	Fold change
		sfiA	dxs						2^-ΔΔCt
Calibrator	WT_LB 1	22.45	19.61
	WT_LB 2	22.29	19.62
	WT_LB 3	22.46	19.63
	replicat bio 1	22.4	19.62	2.78	0.145592
	WT_LB 4	22.23	19.36
	WT_LB 5	22.26	19.46
	WT_LB 6	22.49	19.31
	replicat bio 2	22.3267	19.3767	2.95	0.129408
	WT_LB 7	22.23	19.56
	WT_LB 8	22.34	19.52
	WT_LB 9	22.36	19.52
	replicat bio 3	22.31	19.5333	2.77667	0.145928
	WT_LB 10	22.27	19.32
	WT_LB 11	22.27	19.34
	WT_LB 12	22.26	19.28
	replicat bio 4	22.2667	19.3133	2.95333	0.129109
	WT_LB 13	22.36	19.43
	WT_LB 14	22.38	19.54
	WT_LB 15	22.23	19.42
	replicat bio 5	22.3233	19.4633	2.86	0.137738
	WT_LB 16	22.43	19.47
	WT_LB 17	22.45	19.44
	WT_LB 18	22.22	19.58
	replicat bio 6	22.3667	19.4967	2.87	0.136787
Test 1	WT_MMC 1	19.82	19.54
	WT_MMC 2	19.88	19.34
	WT_MMC 3	19.81	19.52
	replicat bio 1	19.8367	19.4667	0.37	0.773782			-2.41	5.31474
	WT_MMC 4	19.23	18.92
	WT_MMC 5	19.99	18.92
	WT_MMC 6	19.61	18.87
	replicat bio 2	19.61	18.9033	0.706667	0.612734			-2.24333	4.7349
	WT_MMC 7	19.94	19.25
	WT_MMC 8	19.62	19.46
	WT_MMC 9	19.84	19.83
	replicat bio 3	19.8	19.5133	0.286667	0.819794			-2.49	5.61778
	WT_MMC 10	19.78	19.18
	WT_MMC 11	19.72	19.12
	WT_MMC 12	19.74	19.24
	replicat bio 4	19.7467	19.18	0.566667	0.675175			-2.38667	5.22948
	WT_MMC 13	18.27	17.81
	WT_MMC 14	18.21	17.77
	WT_MMC 15	18.23	17.66
	replicat bio 5	18.2367	17.7467	0.49	0.712025			-2.37	5.16941
	WT_MMC 16	19.25	18.84
	WT_MMC 17	19.2	18.87
	WT_MMC 18	19.23	18.46
	replicat bio 6	19.2267	18.7233	0.503333	0.705475			-2.36667	5.15748

## Sheet: WT_GM vs LB
		Target gene	HKG	ΔCt	2^-ΔCt	2^-ΔCt moy	SD 2^-ΔCt	ΔΔCt	Fold change
		sfiA	dxs						2^-ΔΔCt
Calibrator	WT_LB 1	22.45	19.61
	WT_LB 2	22.29	19.62
	WT_LB 3	22.46	19.63
	replicat bio 1	22.4	19.62	2.78	0.145592
	WT_LB 4	22.23	19.36
	WT_LB 5	22.26	19.46
	WT_LB 6	22.49	19.31
	replicat bio 2	22.3267	19.3767	2.95	0.129408
	WT_LB 7	22.23	19.56
	WT_LB 8	22.34	19.52
	WT_LB 9	22.36	19.52
	replicat bio 3	22.31	19.5333	2.77667	0.145928
	WT_LB 10	22.27	19.32
	WT_LB 11	22.27	19.34
	WT_LB 12	22.26	19.28
	replicat bio 4	22.2667	19.3133	2.95333	0.129109
	WT_LB 13	22.36	19.43
	WT_LB 14	22.38	19.54
	WT_LB 15	22.23	19.42
	replicat bio 5	22.3233	19.4633	2.86	0.137738
	WT_LB 16	22.43	19.47
	WT_LB 17	22.45	19.44
	WT_LB 18	22.22	19.58
	replicat bio 6	22.3667	19.4967	2.87	0.136787
Test 1	WT_GM 1	22.37	19.83
	WT_GM 2	22.17	19.99
	WT_GM 3	22.24	19.08
	replicat bio 1	22.26	19.6333	2.62667	0.161918			-0.153333	1.11214
	WT_GM 4	22.41	19.22
	WT_GM 5	22.39	19.14
	WT_GM 6	21.96	19.3
	replicat bio 2	22.2533	19.22	3.03333	0.122145			0.0833333	0.943874
	WT_GM 7	22.02	19.14
	WT_GM 8	22.04	19.46
	WT_GM 9	22.22	19.02
	replicat bio 3	22.0933	19.2067	2.88667	0.135216			0.11	0.926588
	WT_GM 10	22.62	19.04
	WT_GM 11	22.18	19.02
	WT_GM 12	22.84	18.86
	replicat bio 4	22.5467	18.9733	3.57333	0.0840078			0.62	0.650671
	WT_GM 13	22.18	19.17
	WT_GM 14	22.33	19.3
	WT_GM 15	22.34	19.34
	replicat bio 5	22.2833	19.27	3.01333	0.12385			0.153333	0.899171
	WT_GM 16	21.89	18.95
	WT_GM 17	21.99	18.99
	WT_GM 18	21.99	18.84
	replicat bio 6	21.9567	18.9267	3.03	0.122428			0.16	0.895025

## Sheet: WT_pDIJ_TOB vs LB
		Target gene	HKG	ΔCt	2^-ΔCt	2^-ΔCt moy	SD 2^-ΔCt	ΔΔCt	Fold change
		sfiA	dxs						2^-ΔΔCt
Calibrator	WT/pDIJ_LB 1	21.02	19.98
	WT/pDIJ_LB 2	21.09	19.7
	WT/pDIJ_LB 3	20.92	19.65
	replicat bio 1	21.01	19.7767	1.23333	0.425334
	WT/pDIJ_LB 4	20.82	19.32
	WT/pDIJ_LB 5	20.89	19.26
	WT/pDIJ_LB 6	20.915	19.22
	replicat bio 2	20.875	19.2667	1.60833	0.327977
	WT/pDIJ_LB 7	20.95	19.68
	WT/pDIJ_LB 8	20.91	19.68
	WT/pDIJ_LB 9	20.84	19.63
	replicat bio 3	20.9	19.6633	1.23667	0.424352
	WT/pDIJ_LB 10	20.48	18.88
	WT/pDIJ_LB 11	20.53	18.92
	WT/pDIJ_LB 12	21.06	19.45
	replicat bio 4	20.69	19.0833	1.60667	0.328356
	WT/pDIJ_LB 13	20.92	20
	WT/pDIJ_LB 14	20.87	19.28
	WT/pDIJ_LB 15	21.04	19.27
	replicat bio 5	20.9433	19.5167	1.42667	0.371989
	WT/pDIJ_LB 16	20.99	19.53
	WT/pDIJ_LB 17	20.94	19.53
	WT/pDIJ_LB 18	20.9	19.51
	replicat bio 6	20.9433	19.5233	1.42	0.373712
Test 1	WT/pDIJ_TOB 1	19.22	20.04
	WT/pDIJ_TOB 2	19.18	19.72
	WT/pDIJ_TOB 3	19.06	19.9
	replicat bio 1	19.1533	19.8867	-0.733333	1.66248			-1.96667	3.90864
	WT/pDIJ_TOB 4	19.48	19.62
	WT/pDIJ_TOB 5	19.22	19.64
	WT/pDIJ_TOB 6	19.38	19.69
	replicat bio 2	19.36	19.65	-0.29	1.22264			-1.89833	3.72782
	WT/pDIJ_TOB 7	19.45	19.56
	WT/pDIJ_TOB 8	19.47	19.68
	WT/pDIJ_TOB 9	19.38	19.61
	replicat bio 3	19.4333	19.6167	-0.183333	1.1355			-1.42	2.67586
	WT/pDIJ_TOB 10	19.48	19.62
	WT/pDIJ_TOB 11	19.22	19.65
	WT/pDIJ_TOB 12	19.38	19.69
	replicat bio 4	19.36	19.6533	-0.293333	1.22547			-1.9	3.73213
	WT/pDIJ_TOB 13	18.81	19.19
	WT/pDIJ_TOB 14	18.91	19.23
	WT/pDIJ_TOB 15	18.84	19.24
	replicat bio 5	18.8533	19.22	-0.366667	1.28937			-1.79333	3.46615
	WT/pDIJ_TOB 16	19.99	20.44
	WT/pDIJ_TOB 17	19.98	20.43
	WT/pDIJ_TOB 18	19.95	20.18
	replicat bio 6	19.9733	20.35	-0.376667	1.29834			-1.79667	3.47417

## Sheet: WT_pDIJ_MMC vs LB
		Target gene	HKG	ΔCt	2^-ΔCt	2^-ΔCt moy	SD 2^-ΔCt	ΔΔCt	Fold change
		sfiA	dxs						2^-ΔΔCt
Calibrator	WT/pDIJ_LB 1	21.02	19.98
	WT/pDIJ_LB 2	21.09	19.7
	WT/pDIJ_LB 3	20.92	19.65
	replicat bio 1	21.01	19.7767	1.23333	0.425334
	WT/pDIJ_LB 4	20.82	19.32
	WT/pDIJ_LB 5	20.89	19.26
	WT/pDIJ_LB 6	20.915	19.22
	replicat bio 2	20.875	19.2667	1.60833	0.327977
	WT/pDIJ_LB 7	20.95	19.68
	WT/pDIJ_LB 8	20.91	19.68
	WT/pDIJ_LB 9	20.84	19.63
	replicat bio 3	20.9	19.6633	1.23667	0.424352
	WT/pDIJ_LB 10	20.48	18.88
	WT/pDIJ_LB 11	20.53	18.92
	WT/pDIJ_LB 12	21.06	19.45
	replicat bio 4	20.69	19.0833	1.60667	0.328356
	WT/pDIJ_LB 13	20.92	20
	WT/pDIJ_LB 14	20.87	19.28
	WT/pDIJ_LB 15	21.04	19.27
	replicat bio 5	20.9433	19.5167	1.42667	0.371989
	WT/pDIJ_LB 16	20.99	19.53
	WT/pDIJ_LB 17	20.94	19.53
	WT/pDIJ_LB 18	20.9	19.51
	replicat bio 6	20.9433	19.5233	1.42	0.373712
Test 1	WT/pDIJ_MMC 1	19.46	20.42
	WT/pDIJ_MMC 2	19.51	20.26
	WT/pDIJ_MMC 3	19.42	20.58
	replicat bio 1	19.4633	20.42	-0.956667	1.94082			-2.19	4.56305
	WT/pDIJ_MMC 4	19.73	20.14
	WT/pDIJ_MMC 5	19.15	20.16
	WT/pDIJ_MMC 6	19.39	20.28
	replicat bio 2	19.4233	20.1933	-0.77	1.70527			-2.37833	5.19936
	WT/pDIJ_MMC 7	19.65	20.76
	WT/pDIJ_MMC 8	19.51	20.45
	WT/pDIJ_MMC 9	19.63	20.44
	replicat bio 3	19.5967	20.55	-0.953333	1.93634			-2.19	4.56305
	WT/pDIJ_MMC 10	19.94	20.19
	WT/pDIJ_MMC 11	19.75	20.46
	WT/pDIJ_MMC 12	19.13	20.93
	replicat bio 4	19.6067	20.5267	-0.92	1.89212			-2.52667	5.76239
	WT/pDIJ_MMC 13	19.32	20.22
	WT/pDIJ_MMC 14	19.34	20.23
	WT/pDIJ_MMC 15	19.48	20.38
	replicat bio 5	19.38	20.2767	-0.896667	1.86176			-2.32333	5.00487
	WT/pDIJ_MMC 16	19.45	19.99
	WT/pDIJ_MMC 17	19.43	19.94
	WT/pDIJ_MMC 18	18.91	20.56
	replicat bio 6	19.2633	20.1633	-0.9	1.86607			-2.32	4.99332

## Sheet: WT_pDIJ_GM vs LB
		Target gene	HKG	ΔCt	2^-ΔCt	2^-ΔCt moy	SD 2^-ΔCt	ΔΔCt	Fold change
		sfiA	dxs						2^-ΔΔCt
Calibrator	WT/pDIJ_LB 1	21.02	19.98
	WT/pDIJ_LB 2	21.09	19.7
	WT/pDIJ_LB 3	20.92	19.65
	replicat bio 1	21.01	19.7767	1.23333	0.425334
	WT/pDIJ_LB 4	20.82	19.32
	WT/pDIJ_LB 5	20.89	19.26
	WT/pDIJ_LB 6	20.915	19.22
	replicat bio 2	20.875	19.2667	1.60833	0.327977
	WT/pDIJ_LB 7	20.95	19.68
	WT/pDIJ_LB 8	20.91	19.68
	WT/pDIJ_LB 9	20.84	19.63
	replicat bio 3	20.9	19.6633	1.23667	0.424352
	WT/pDIJ_LB 10	20.48	18.88
	WT/pDIJ_LB 11	20.53	18.92
	WT/pDIJ_LB 12	21.06	19.45
	replicat bio 4	20.69	19.0833	1.60667	0.328356
	WT/pDIJ_LB 13	20.92	20
	WT/pDIJ_LB 14	20.87	19.28
	WT/pDIJ_LB 15	21.04	19.27
	replicat bio 5	20.9433	19.5167	1.42667	0.371989
	WT/pDIJ_LB 16	20.99	19.53
	WT/pDIJ_LB 17	20.94	19.53
	WT/pDIJ_LB 18	20.9	19.51
	replicat bio 6	20.9433	19.5233	1.42	0.373712
Test 1	WT/pDIJ_GM 1	19.65	19.93
	WT/pDIJ_GM 2	19.42	19.85
	WT/pDIJ_GM 3	19.51	19.92
	replicat bio 1	19.5267	19.9	-0.373333	1.29534			-1.60667	3.04547
	WT/pDIJ_GM 4	19.62	19.91
	WT/pDIJ_GM 5	19.58	19.98
	WT/pDIJ_GM 6	19.66	19.84
	replicat bio 2	19.62	19.91	-0.29	1.22264			-1.89833	3.72782
	WT/pDIJ_GM 7	19.55	19.93
	WT/pDIJ_GM 8	19.42	19.85
	WT/pDIJ_GM 9	19.51	19.92
	replicat bio 3	19.4933	19.9	-0.406667	1.32562			-1.64333	3.12387
	WT/pDIJ_GM 10	18.62	19.2
	WT/pDIJ_GM 11	18.58	19.12
	WT/pDIJ_GM 12	18.02	18.02
	replicat bio 4	18.4067	18.78	-0.373333	1.29534			-1.98	3.94493
	WT/pDIJ_GM 13	18.99	19.23
	WT/pDIJ_GM 14	18.92	19.34
	WT/pDIJ_GM 15	18.95	19.36
	replicat bio 5	18.9533	19.31	-0.356667	1.28046			-1.78333	3.44221
	WT/pDIJ_GM 16	20.08	20.36
	WT/pDIJ_GM 17	20.04	20.42
	WT/pDIJ_GM 18	20.06	20.48
	replicat bio 6	20.06	20.42	-0.36	1.28343			-1.78	3.43426
