# Supplementary material for: A qnr-plasmid allows aminoglycosides to induce SOS in Escherichia coli
Source: eLife. 2022 Jan 17;11:e69511. doi: 10.7554/eLife.69511 (PMC8789287; doi:10.7554/eLife.69511)
Supplement: Figure 2—source data 3. [file elife-69511-fig2-data3.xlsx]

## Sheet: WT_pDIJ vs WT_LB
		Target gene	HKG	ΔCt	2^-ΔCt	2^-ΔCt moy	SD 2^-ΔCt	ΔΔCt	Fold change
		sfiA	dxs						2^-ΔΔCt
Calibrator	WT_LB 1	21.81	22.9
	WT_LB 2	21.73	22.79
	WT_LB 3	21.7	22.89
	replicat bio 1	21.7467	22.86	-1.11333	2.16345
	WT_LB 4	21.61	23.57
	WT_LB 5	21.46	23.53
	WT_LB 6	21.49	23.13
	replicat bio 2	21.52	23.41	-1.89	3.70635
	WT_LB 7	21.72	22.9
	WT_LB 8	21.68	22.84
	WT_LB 9	21.7	22.89
	replicat bio 3	21.7	22.8767	-1.17667	2.26054
	WT_LB 10	21.52	23.57
	WT_LB 11	21.46	23.53
	WT_LB 12	21.49	23.13
	replicat bio 4	21.49	23.41	-1.92	3.78423
	WT_LB 13	21.35	22.88
	WT_LB 14	21.32	22.83
	WT_LB 15	21.34	22.87
	replicat bio 5	21.3367	22.86	-1.52333	2.87454
	WT_LB 16	21.46	22.98
	WT_LB 17	21.42	23.13
	WT_LB 18	21.94	23.29
	replicat bio 6	21.6067	23.1333	-1.52667	2.88119
Test 1	WT/pDIJ_LB 1	21.81	23.44
	WT/pDIJ_LB 2	21.71	22.71
	WT/pDIJ_LB 3	21.1	23.08
	replicat bio 1	21.54	23.0767	-1.53667	2.90123			-0.423333	1.34102
	WT/pDIJ_LB 4	21.18	22.52
	WT/pDIJ_LB 5	20.77	22.86
	WT/pDIJ_LB 6	20.68	22.87
	replicat bio 2	20.8767	22.75	-1.87333	3.66378			0.0166667	0.988514
	WT/pDIJ_LB 7	22.07	22.98
	WT/pDIJ_LB 8	21.45	22.98
	WT/pDIJ_LB 9	21.48	23.25
	replicat bio 3	21.6667	23.07	-1.40333	2.64512			-0.226667	1.17013
	WT/pDIJ_LB 10	21.13	22.62
	WT/pDIJ_LB 11	20.76	22.68
	WT/pDIJ_LB 12	20.74	22.95
	replicat bio 4	20.8767	22.75	-1.87333	3.66378			0.0466667	0.968171
	WT/pDIJ_LB 13	21.12	22.82
	WT/pDIJ_LB 14	21.5	22.88
	WT/pDIJ_LB 15	21.1	23.03
	replicat bio 5	21.24	22.91	-1.67	3.18215			-0.146667	1.10701
	WT/pDIJ_LB 16	21.45	23.04
	WT/pDIJ_LB 17	21.42	23.04
	WT/pDIJ_LB 18	21.09	22.86
	replicat bio 6	21.32	22.98	-1.66	3.16017			-0.133333	1.09682

## Sheet: WT_pDIJ vs WT_TOB
		Target gene	HKG	ΔCt	2^-ΔCt	2^-ΔCt moy	SD 2^-ΔCt	ΔΔCt	Fold change
		sfiA	dxs						2^-ΔΔCt
Calibrator	WT_TOB 1	22.12	19.48
	WT_TOB 2	22.14	19.27
	WT_TOB 3	22.07	19.23
	replicat bio 1	22.11	19.3267	2.78333	0.145256
	WT_TOB 4	22.23	19.36
	WT_TOB 5	22.26	19.46
	WT_TOB 6	22.49	19.31
	replicat bio 2	22.3267	19.3767	2.95	0.129408
	WT_TOB 7	22.45	19.61
	WT_TOB 8	22.29	19.62
	WT_TOB 9	22.46	19.63
	replicat bio 3	22.4	19.62	2.78	0.145592
	WT_TOB 10	22.14	19.04
	WT_TOB 11	22.04	19.02
	WT_TOB 12	22.21	19.19
	replicat bio 4	22.13	19.0833	3.04667	0.121021
	WT_TOB 13	22.23	19.18
	WT_TOB 14	22.27	19.57
	WT_TOB 15	22.28	19.51
	replicat bio 5	22.26	19.42	2.84	0.139661
	WT_TOB 16	22.46	19.78
	WT_TOB 17	22.19	19.75
	WT_TOB 18	22.48	19.7
	replicat bio 6	22.3767	19.7433	2.63333	0.161171
Test 1	WT/pDIJ_TOB 1	19.82	20.04
	WT/pDIJ_TOB 2	19.88	20.03
	WT/pDIJ_TOB 3	19.82	20.04
	replicat bio 1	19.84	20.0367	-0.196667	1.14605			-2.98	7.88986
	WT/pDIJ_TOB 4	19.14	19.24
	WT/pDIJ_TOB 5	19.12	19.47
	WT/pDIJ_TOB 6	19.12	19.05
	replicat bio 2	19.1267	19.2533	-0.126667	1.09177			-3.07667	8.43663
	WT/pDIJ_TOB 7	18.98	19.24
	WT/pDIJ_TOB 8	18.98	19.46
	WT/pDIJ_TOB 9	19.84	19.83
	replicat bio 3	19.2667	19.51	-0.243333	1.18372			-3.02333	8.13044
	WT/pDIJ_TOB 10	19.78	19.18
	WT/pDIJ_TOB 11	19.71	19.13
	WT/pDIJ_TOB 12	19.64	19.24
	replicat bio 4	19.71	19.1833	0.526667	0.694157			-2.52	5.73582
	WT/pDIJ_TOB 13	19.02	19.19
	WT/pDIJ_TOB 14	19.06	19.23
	WT/pDIJ_TOB 15	19.41	19.24
	replicat bio 5	19.1633	19.22	-0.0566667	1.04006			-2.89667	7.44704
	WT/pDIJ_TOB 16	19.99	20.44
	WT/pDIJ_TOB 17	19.98	20.43
	WT/pDIJ_TOB 18	19.95	20.38
	replicat bio 6	19.9733	20.4167	-0.443333	1.35974			-3.07667	8.43663

## Sheet: WT_pDIJ vs WT_GM
		Target gene	HKG	ΔCt	2^-ΔCt	2^-ΔCt moy	SD 2^-ΔCt	ΔΔCt	Fold change
		sfiA	dxs						2^-ΔΔCt
Calibrator	WT_GM 1	22.45	19.61
	WT_GM 2	22.29	19.62
	WT_GM 3	22.46	19.63
	replicat bio 1	22.4	19.62	2.78	0.145592
	WT_GM 4	22.23	19.36
	WT_GM 5	22.26	19.46
	WT_GM 6	22.49	19.31
	replicat bio 2	22.3267	19.3767	2.95	0.129408
	WT_GM 7	22.12	19.32
	WT_GM 8	22.12	19.31
	WT_GM 9	22.17	19.08
	replicat bio 3	22.1367	19.2367	2.9	0.133972
	WT_GM 10	22.25	19.04
	WT_GM 11	22.18	19.02
	WT_GM 12	22.28	19.12
	replicat bio 4	22.2367	19.06	3.17667	0.110593
	WT_GM 13	22.47	19.49
	WT_GM 14	22.43	19.32
	WT_GM 15	22.48	19.45
	replicat bio 5	22.46	19.42	3.04	0.121582
	WT_GM 16	22.36	19.05
	WT_GM 17	22.31	19.07
	WT_GM 18	22.37	19.07
	replicat bio 6	22.3467	19.0633	3.28333	0.102711
Test 1	WT/pDIJ_GM 1	19.19	19.34
	WT/pDIJ_GM 2	19.37	19.65
	WT/pDIJ_GM 3	19.24	19.47
	replicat bio 1	19.2667	19.4867	-0.22	1.16473			-3	8
	WT/pDIJ_GM 4	19.41	19.22
	WT/pDIJ_GM 5	19.39	19.24
	WT/pDIJ_GM 6	18.96	19.31
	replicat bio 2	19.2533	19.2567	-0.00333333	1.00231			-2.95333	7.74537
	WT/pDIJ_GM 7	19.02	19.14
	WT/pDIJ_GM 8	19.04	19.38
	WT/pDIJ_GM 9	19.22	19.35
	replicat bio 3	19.0933	19.29	-0.196667	1.14605			-3.09667	8.5544
	WT/pDIJ_GM 10	19.62	19.62
	WT/pDIJ_GM 11	19.18	19.22
	WT/pDIJ_GM 12	19.84	19.63
	replicat bio 4	19.5467	19.49	0.0566667	0.961483			-3.12	8.69388
	WT/pDIJ_GM 13	19.25	19.45
	WT/pDIJ_GM 14	19.15	19.08
	WT/pDIJ_GM 15	19.21	19.08
	replicat bio 5	19.2033	19.2033	0	1			-3.04	8.22491
	WT/pDIJ_GM 16	19.67	19.32
	WT/pDIJ_GM 17	19.65	19.18
	WT/pDIJ_GM 18	19.33	19.16
	replicat bio 6	19.55	19.22	0.33	0.795536			-2.95333	7.74537
