# Supplementary material for: A qnr-plasmid allows aminoglycosides to induce SOS in Escherichia coli
Source: eLife. 2022 Jan 17;11:e69511. doi: 10.7554/eLife.69511 (PMC8789287; doi:10.7554/eLife.69511)
Supplement: Figure 2—source data 4. [file elife-69511-fig2-data4.xlsx]

## Sheet: WT_chrom_qnrD_TOB vs LB
		Target gene	HKG	ΔCt	2^-ΔCt	2^-ΔCt moy	SD 2^-ΔCt	ΔΔCt	Fold change		MIN 2^-ΔCt	MAX 2^-ΔCt	MAX 2^-ΔΔCt	MIN 2^-ΔΔCt
		qnrD	dxs						2^-ΔΔCt ou ratio des 2^-ΔCt
Calibrator	WT/qnrD chrom LB_1	19.22	22.91
	WT/qnrD chrom LB_2	19.14	22.19
	WT/qnrD chrom LB_3	20.18	21.91
	replicat biologique 1	19.5133	22.3367	-2.82333	7.07796
	WT/qnrD chrom LB_4	21.14	22.71
	WT/qnrD chrom LB_5	21.07	23.36
	WT/qnrD chrom LB_6	21.01	22.04
	replicat biologique 2	21.0733	22.7033	-1.63	3.09513
	WT/qnrD chrom LB_7	19.96	21.92
	WT/qnrD chrom LB_8	19.95	22.2
	WT/qnrD chrom LB_9	19.99	22.1
	replicat biologique 3	19.9667	22.0733	-2.10667	4.30695
	WT/qnrD chrom LB_10	26.24	24.97
	WT/qnrD chrom LB_11	27.57	25.52
	WT/qnrD chrom LB_12	26.94
	replicat biologique 4	26.9167	25.245	1.67167	0.313891
	WT/qnrD chrom LB_13	25.98	24.52		24.52
	WT/qnrD chrom LB_14	26.53	24.13		24.13
	WT/qnrD chrom LB_15	30.64	24.01		24.01
	replicat biologique 5	27.7167	24.22	3.49667	0.0885928
	WT/qnrD chrom LB_16	23.05	23.18
	WT/qnrD chrom LB_17	22.98	23.11
	WT/qnrD chrom LB_18	23.08	23.22
	replicat biologique 6	23.0367	23.17	-0.133333	1.09682
Test 1	WT/qnrD chrom_TOB 1	19.36	23.03
	WT/qnrD chrom_TOB 2	19.6	22.35
	WT/qnrD chrom_TOB 3	19.3	21.97
	replicat biologique 1	19.42	22.45	-3.03	8.1681			-0.206667	1.15402
	WT/qnrD chrom_TOB 4	19.64	21.46
	WT/qnrD chrom_TOB 5	19.76	21.56
	WT/qnrD chrom_TOB 6	19.62	21.48
	replicat biologique 2	19.6733	21.5	-1.82667	3.54717			-0.196667	1.14605
	WT/qnrD chrom_TOB 7	21.69	22.27
	WT/qnrD chrom_TOB 8	21.81	22.06
	WT/qnrD chrom_TOB 9	21.68	22.13
	replicat biologique 3	21.7267	22.1533	-0.426667	1.34412			1.68	0.312083
	WT/qnrD chrom_TOB 10	26.7	23.74
	WT/qnrD chrom_TOB 11	26.41	24.56
	WT/qnrD chrom_TOB 12	26.21	24.61
	replicat biologique 4	26.44	24.3033	2.13667	0.227405			0.465	0.724471
	WT/qnrD chrom_TOB 13	30.98	25.66
	WT/qnrD chrom_TOB 14	30.98	25.86
	WT/qnrD chrom_TOB 15	30.7	25.69
	replicat biologique 5	30.8867	25.7367	5.15	0.0281641			1.65333	0.317905
	WT/qnrD chrom_TOB 16	23.62	23.08
	WT/qnrD chrom_TOB 17	23.56	23.14
	WT/qnrD chrom_TOB 18	23.62	23.36
	replicat biologique 6	23.6	23.1933	0.406667	0.754364			0.54	0.687771

## Sheet: WT_chrom_qnrD_MMC vs LB
		Target gene	HKG	ΔCt	2^-ΔCt	2^-ΔCt moy	SD 2^-ΔCt	ΔΔCt	Fold change		MIN 2^-ΔCt	MAX 2^-ΔCt	MAX 2^-ΔΔCt	MIN 2^-ΔΔCt
		qnrD	dxs						2^-ΔΔCt ou ratio des 2^-ΔCt
Calibrator	WT/qnrD chrom LB_1	19.22	22.91
	WT/qnrD chrom LB_2	19.14	22.19
	WT/qnrD chrom LB_3	20.18	21.91
	replicat biologique 1	19.5133	22.3367	-2.82333	7.07796
	WT/qnrD chrom LB_4	21.14	22.71
	WT/qnrD chrom LB_5	21.07	23.36
	WT/qnrD chrom LB_6	21.01	22.04
	replicat biologique 2	21.0733	22.7033	-1.63	3.09513
	WT/qnrD chrom LB_7	19.96	21.92
	WT/qnrD chrom LB_8	19.95	22.2
	WT/qnrD chrom LB_9	19.99	22.1
	replicat biologique 3	19.9667	22.0733	-2.10667	4.30695
	WT/qnrD chrom LB_10	26.24	24.97
	WT/qnrD chrom LB_11	27.57	25.52
	WT/qnrD chrom LB_12	26.94
	replicat biologique 4	26.9167	25.245	1.67167	0.313891
	WT/qnrD chrom LB_13	25.98	24.52
	WT/qnrD chrom LB_14	26.53	24.13
	WT/qnrD chrom LB_15	30.64	24.01
	replicat biologique 5	27.7167	24.22	3.49667	0.0885928
	WT/qnrD chrom LB_16	23.05	23.18
	WT/qnrD chrom LB_17	22.98	23.11
	WT/qnrD chrom LB_18	23.08	23.22
	replicat biologique 6	23.0367	23.17	-0.133333	1.09682
Test 1	WT/qnrD chrom_MMC 1	19.09	22.17
	WT/qnrD chrom_MMC 2	19.14	22.24
	WT/qnrD chrom_MMC 3	19.19	22.67
	replicat biologique 1	19.14	22.36	-3.22	9.31787			-0.396667	1.31646
	WT/qnrD chrom_MMC 4	19.76	22.59
	WT/qnrD chrom_MMC 5	19.78	22.61
	WT/qnrD chrom_MMC 6	19.74	22.75
	replicat biologique 2	19.76	22.65	-2.89	7.4127			-1.26	2.39496
	WT/qnrD chrom_MMC 7	19.55	22.33
	WT/qnrD chrom_MMC 8	19.68	21.95
	WT/qnrD chrom_MMC 9	19.62	22.12
	replicat biologique 3	19.6167	22.1333	-2.51667	5.72258			-0.41	1.32869
	WT/qnrD chrom_MMC 10	24.78	24.02
	WT/qnrD chrom_MMC 11	24.58	24.78
	WT/qnrD chrom_MMC 12	25.18	24.69
	replicat biologique 4	24.8467	24.4967	0.35	0.784584			-1.32167	2.49955
	WT/qnrD chrom_MMC 13	26.98	24.68
	WT/qnrD chrom_MMC 14	27.02	24.92
	WT/qnrD chrom_MMC 15	26.41	24.78
	replicat biologique 5	26.8033	24.7933	2.01	0.248273			-1.48667	2.80241
	WT/qnrD chrom_MMC 16	21.98	23.26
	WT/qnrD chrom_MMC 17	21.98	23.28
	WT/qnrD chrom_MMC 18	22.06	23.22
	replicat biologique 6	22.0067	23.2533	-1.24667	2.37293			-1.11333	2.16345

## Sheet: WT_chrom_qnrD_GM vs LB
		Target gene	HKG	ΔCt	2^-ΔCt	2^-ΔCt moy	SD 2^-ΔCt	ΔΔCt	Fold change		MIN 2^-ΔCt	MAX 2^-ΔCt	MAX 2^-ΔΔCt	MIN 2^-ΔΔCt
		qnrD	dxs						2^-ΔΔCt ou ratio des 2^-ΔCt
Calibrator	WT/qnrD chrom LB_1	19.22	22.91
	WT/qnrD chrom LB_2	19.14	22.19
	WT/qnrD chrom LB_3	20.18	21.91
	replicat biologique 1	19.5133	22.3367	-2.82333	7.07796
	WT/qnrD chrom LB_4	21.14	22.71
	WT/qnrD chrom LB_5	21.07	23.36
	WT/qnrD chrom LB_6	21.01	22.04
	replicat biologique 2	21.0733	22.7033	-1.63	3.09513
	WT/qnrD chrom LB_7	19.96	21.92
	WT/qnrD chrom LB_8	19.95	22.2
	WT/qnrD chrom LB_9	19.99	22.1
	replicat biologique 3	19.9667	22.0733	-2.10667	4.30695
	WT/qnrD chrom LB_10	26.24	24.97
	WT/qnrD chrom LB_11	27.57	25.52
	WT/qnrD chrom LB_12	26.94
	replicat biologique 4	26.9167	25.245	1.67167	0.313891
	WT/qnrD chrom LB_13	25.98	24.52
	WT/qnrD chrom LB_14	26.53	24.13
	WT/qnrD chrom LB_15	30.64	24.01
	replicat biologique 5	27.7167	24.22	3.49667	0.0885928
	WT/qnrD chrom LB_16	23.05	23.18
	WT/qnrD chrom LB_17	22.98	23.11
	WT/qnrD chrom LB_18	23.08	23.22
	replicat biologique 6	23.0367	23.17	-0.133333	1.09682
Test 1	WT/qnrD chrom_GM 1	19.36	22.14
	WT/qnrD chrom_GM 2	19.6	22.35
	WT/qnrD chrom_GM 3	19.3	21.97
	replicat biologique 1	19.42	22.1533	-2.73333	6.6499			0.09	0.939523
	WT/qnrD chrom_GM 4	19.74	21.46
	WT/qnrD chrom_GM 5	19.76	21.56
	WT/qnrD chrom_GM 6	19.78	21.48
	replicat biologique 2	19.76	21.5	-1.74	3.34035			-0.11	1.07923
	WT/qnrD chrom_GM 7	20.88	22.27
	WT/qnrD chrom_GM 8	20.68	22.06
	WT/qnrD chrom_GM 9	20.62	22.13
	replicat biologique 3	20.7267	22.1533	-1.42667	2.68825			0.68	0.624165
	WT/qnrD chrom_GM 10	26.54	23.74
	WT/qnrD chrom_GM 11	26.41	24.56
	WT/qnrD chrom_GM 12	26.21	24.61
	replicat biologique 4	26.3867	24.3033	2.08333	0.235969			0.411667	0.751754
	WT/qnrD chrom_GM 13	29.89	25.66
	WT/qnrD chrom_GM 14	29.58	25.86
	WT/qnrD chrom_GM 15	29.7	25.69
	replicat biologique 5	29.7233	25.7367	3.98667	0.0630803			0.49	0.712025
	WT/qnrD chrom_GM 16	23.04	22.99
	WT/qnrD chrom_GM 17	23.02	22.98
	WT/qnrD chrom_GM 18	22.98	22.95
	replicat bio 6	23.0133	22.9733	0.04	0.972655			0.173333	0.886791

## Sheet: WT_chrom_pDIJ_TOB vs LB
		Target gene	HKG	ΔCt	2^-ΔCt	2^-ΔCt moy	SD 2^-ΔCt	ΔΔCt	Fold change		MIN 2^-ΔCt	MAX 2^-ΔCt	MAX 2^-ΔΔCt	MIN 2^-ΔΔCt
		qnrD	dxs						2^-ΔΔCt ou ratio des 2^-ΔCt
Calibrator	WT/dij chrom LB_1	30.48	24.98
	WT/dij chrom LB_2	31.2	24.38
	WT/dij chrom LB_3	32.01	24.43
	replicat biologique 1	31.23	24.5967	6.63333	0.0100732
	WT/dij chrom LB_4	30.54	24.52
	WT/dij chrom LB_5	30.87	25.78
	WT/dij chrom LB_6	30.23	25.33
	replicat biologique 2	30.5467	25.21	5.33667	0.0247459
	WT/dij chrom LB_7	30.64	23.31
	WT/dij chrom LB_8	30.46	23.46
	WT/dij chrom LB_9	29.99	23.48
	replicat biologique 3	30.3633	23.4167	6.94667	0.00810672
	WT/dij chrom LB_10	30.23	23.32
	WT/dij chrom LB_11	29.59	23.16
	WT/dij chrom LB_12	29.23	23.3
	replicat biologique 4	29.6833	23.26	6.42333	0.0116516
	WT/dij chrom LB_13	28.96	21.92
	WT/dij chrom LB_14	28.95	22.2
	WT/dij chrom LB_15	28.99	22.1
	replicat biologique 5	28.9667	22.0733	6.89333	0.00841201
	WT/dij chrom LB_16	29.87	23.43
	WT/dij chrom LB_17	29.96	23.52
	WT/dij chrom LB_18	29.92	23.48
	replicat biologique 6	29.9167	23.4767	6.44	0.0115177
Test 1	WT/dij chrom_TOB 1	29.12	24.28
	WT/dij chrom_TOB 2	29.35	24.08
	WT/dij chrom_TOB 3	29.27	23.93
	replicat biologique 1	29.2467	24.0967	5.15	0.0281641			-1.48333	2.79594
	WT/dij chrom_TOB 4	29.42	24.32
	WT/dij chrom_TOB 5	29.25	24.68
	WT/dij chrom_TOB 6	29.13	24.54
	replicat biologique 2	29.2667	24.5133	4.75333	0.037077			-0.583333	1.49831
	WT/dij chrom_TOB 7	29.04	23.91
	WT/dij chrom_TOB 8	30.4	23.82
	WT/dij chrom_TOB 9	29.64	23.92
	replicat biologique 3	29.6933	23.8833	5.81	0.0178244			-1.13667	2.19872
	WT/dij chrom_TOB 10	30.26	24.18
	WT/dij chrom_TOB 11	29.16	24.33
	WT/dij chrom_TOB 12	29.86	24.16
	replicat biologique 4	29.76	24.2233	5.53667	0.0215426			-0.886667	1.8489
	WT/dij chrom_TOB 13	30.98	25.66
	WT/dij chrom_TOB 14	30.98	25.86
	WT/dij chrom_TOB 15	30.7	25.69
	replicat biologique 5	30.8867	25.7367	5.15	0.0281641			-1.74333	3.34808
	WT/dij chrom_TOB 16	29.62	24.34
	WT/dij chrom_TOB 17	29.9	24.62
	WT/dij chrom_TOB 18	29.58	24.32
	replicat biologique 6	29.7	24.4267	5.27333	0.0258564			-1.16667	2.24492

## Sheet: WT_chrom_pDIJ_MMC vs LB
		Target gene	HKG	ΔCt	2^-ΔCt	2^-ΔCt moy	SD 2^-ΔCt	ΔΔCt	Fold change		MIN 2^-ΔCt	MAX 2^-ΔCt	MAX 2^-ΔΔCt	MIN 2^-ΔΔCt
		qnrD	dxs						2^-ΔΔCt ou ratio des 2^-ΔCt
Calibrator	WT/dij chrom LB_1	30.48	24.98
	WT/dij chrom LB_2	31.2	24.38
	WT/dij chrom LB_3	32.01	24.43
	replicat biologique 1	31.23	24.5967	6.63333	0.0100732
	WT/dij chrom LB_4	30.54	24.52
	WT/dij chrom LB_5	30.87	25.78
	WT/dij chrom LB_6	30.23	25.33
	replicat biologique 2	30.5467	25.21	5.33667	0.0247459
	WT/dij chrom LB_7	30.64	23.31
	WT/dij chrom LB_8	30.46	23.46
	WT/dij chrom LB_9	29.99	23.48
	replicat biologique 3	30.3633	23.4167	6.94667	0.00810672
	WT/dij chrom LB_10	30.23	23.32
	WT/dij chrom LB_11	29.59	23.16
	WT/dij chrom LB_12	29.23	23.3
	replicat biologique 4	29.6833	23.26	6.42333	0.0116516
	WT/dij chrom LB_13	28.96	21.92
	WT/dij chrom LB_14	28.95	22.2
	WT/dij chrom LB_15	28.99	22.1
	replicat biologique 5	28.9667	22.0733	6.89333	0.00841201
	WT/dij chrom LB_16	29.87	23.43
	WT/dij chrom LB_17	29.96	23.52
	WT/dij chrom LB_18	29.92	23.48
	replicat biologique 6	29.9167	23.4767	6.44	0.0115177
Test 1	WT/DIJ chrom_MMC 1	29.67	24.78
	WT/DIJ chrom_MMC 2	29.24	24.39
	WT/DIJ chrom_MMC 3	29.92	24.52
	replicat biologique 1	29.61	24.5633	5.04667	0.0302553			-1.58667	3.00355
	WT/DIJ chrom_MMC 4	29.74	25.04
	WT/DIJ chrom_MMC 5	29.74	25.02
	WT/DIJ chrom_MMC 6	29.72	25.06
	replicat biologique 2	29.7333	25.04	4.69333	0.0386515			-0.643333	1.56193
	WT/DIJ chrom_MMC 7	29.98	23.83
	WT/DIJ chrom_MMC 8	29.88	23.71
	WT/DIJ chrom_MMC 9	29.69	23.87
	replicat biologique 3	29.85	23.8033	6.04667	0.0151277			-0.9	1.86607
	WT/DIJ chrom_MMC 10	29.53	24.02
	WT/DIJ chrom_MMC 11	29.81	24.84
	WT/DIJ chrom_MMC 12	29.71	24.77
	replicat biologique 4	29.6833	24.5433	5.14	0.02836			-1.28333	2.43401
	WT/DIJ chrom_MMC 13	30.98	24.66
	WT/DIJ chrom_MMC 14	30.98	24.88
	WT/DIJ chrom_MMC 15	30.7	25.69
	replicat biologique 5	30.8867	25.0767	5.81	0.0178244			-1.08333	2.11893
	WT/DIJ chrom_MMC 16	29.33	23.99
	WT/DIJ chrom_MMC 17	29.38	24.04
	WT/DIJ chrom_MMC 18	29.96	24.62
	replicat bio 6	29.5567	24.2167	5.34	0.0246888			-1.1	2.14355

## Sheet: WT_chrom_pDIJ_GM vs LB
		Target gene	HKG	ΔCt	2^-ΔCt	2^-ΔCt moy	SD 2^-ΔCt	ΔΔCt	Fold change		MIN 2^-ΔCt	MAX 2^-ΔCt	MAX 2^-ΔΔCt	MIN 2^-ΔΔCt
		qnrD	dxs						2^-ΔΔCt ou ratio des 2^-ΔCt
Calibrator	WT/dij chrom LB_1	30.48	24.98
	WT/dij chrom LB_2	31.2	24.38
	WT/dij chrom LB_3	32.01	24.43
	replicat biologique 1	31.23	24.5967	6.63333	0.0100732
	WT/dij chrom LB_4	30.54	24.52
	WT/dij chrom LB_5	30.87	25.78
	WT/dij chrom LB_6	30.23	25.33
	replicat biologique 2	30.5467	25.21	5.33667	0.0247459
	WT/dij chrom LB_7	30.64	23.31
	WT/dij chrom LB_8	30.46	23.46
	WT/dij chrom LB_9	29.99	23.48
	replicat biologique 3	30.3633	23.4167	6.94667	0.00810672
	WT/dij chrom LB_10	30.23	23.32
	WT/dij chrom LB_11	29.59	23.16
	WT/dij chrom LB_12	29.23	23.3
	replicat biologique 4	29.6833	23.26	6.42333	0.0116516
	WT/dij chrom LB_13	28.96	21.92
	WT/dij chrom LB_14	28.95	22.2
	WT/dij chrom LB_15	28.99	22.1
	replicat biologique 5	28.9667	22.0733	6.89333	0.00841201
	WT/dij chrom LB_16	29.87	23.43
	WT/dij chrom LB_17	29.96	23.52
	WT/dij chrom LB_18	29.92	23.48
	replicat biologique 6	29.9167	23.4767	6.44	0.0115177
Test 1	WT/DIJ chrom_GM 1	29.36	24.03
	WT/DIJ chrom_GM 2	29.6	24.35
	WT/DIJ chrom_GM 3	29.3	24.57
	replicat biologique 1	29.42	24.3167	5.10333	0.02909			-1.53	2.88786
	WT/DIJ chrom_GM 4	29.48	24.72
	WT/DIJ chrom_GM 5	29.42	24.56
	WT/DIJ chrom_GM 6	29.38	24.6
	replicat biologique 2	29.4267	24.6267	4.8	0.0358968			-0.536667	1.45062
	WT/DIJ chrom_GM 7	29.69	24.27
	WT/DIJ chrom_GM 8	30.81	24.07
	WT/DIJ chrom_GM 9	29.68	24.13
	replicat biologique 3	30.06	24.1567	5.90333	0.0167078			-1.04333	2.06098
	WT/DIJ chrom_GM 10	30.27	23.74
	WT/DIJ chrom_GM 11	29.41	24.56
	WT/DIJ chrom_GM 12	29.21	24.61
	replicat biologique 4	29.63	24.3033	5.32667	0.024918			-1.09667	2.1386
	WT/DIJ chrom_GM 13	30.24	24.88
	WT/DIJ chrom_GM 14	30.58	24.64
	WT/DIJ chrom_GM 15	30.88	24.68
	replicat biologique 5	30.5667	24.7333	5.83333	0.0175385			-1.06	2.08493
	WT/DIJ chrom_GM 16	29.81	24.42
	WT/DIJ chrom_GM 17	29.57	24.18
	WT/DIJ chrom_GM 18	29.62	24.24
	replicat bio 6	29.6667	24.28	5.38667	0.023903			-1.05333	2.07532

## Sheet: WT_chrom_qnrD_pDqnrD_TOB vs LB 
		Target gene	HKG	ΔCt	2^-ΔCt	2^-ΔCt moy	SD 2^-ΔCt	ΔΔCt	Fold change		MIN 2^-ΔCt	MAX 2^-ΔCt	MAX 2^-ΔΔCt	MIN 2^-ΔΔCt
		qnrD	dxs						2^-ΔΔCt ou ratio des 2^-ΔCt
Calibrator	WT/qnrD chrom/ΔqnrD LB_1	28.7	27.89
	WT/qnrD chrom/ΔqnrD LB_2	28.7	26.64
	WT/qnrD chrom/ΔqnrD LB_3	28.55	26.57
	replicat biologique 1	28.65	27.0333	1.61667	0.326088
	WT/qnrD chrom/ΔqnrD LB_4	28.66	23.12
	WT/qnrD chrom/ΔqnrD LB_5	27.96	24.94
	WT/qnrD chrom/ΔqnrD LB_6	28.12	25.17
	replicat biologique 2	28.2467	24.41	3.83667	0.069992
	WT/qnrD chrom/ΔqnrD LB_7	28.67	25.56
	WT/qnrD chrom/ΔqnrD LB_8	29.45	24.46
	WT/qnrD chrom/ΔqnrD LB_9	29.53	24.32
	replicat biologique 3	29.2167	24.78	4.43667	0.0461775
	WT/qnrD chrom/ΔqnrD LB_10	28.91	24.61
	WT/qnrD chrom/ΔqnrD LB_11	28.32	25.22
	WT/qnrD chrom/ΔqnrD LB_12	28.48	24.72
	replicat biologique 4	28.57	24.85	3.72	0.0758872
	WT/qnrD chrom/ΔqnrD LB_13	28.46	24.52
	WT/qnrD chrom/ΔqnrD LB_14	28.53	24.13
	WT/qnrD chrom/ΔqnrD LB_15	28.64	24.01
	replicat biologique 5	28.5433	24.22	4.32333	0.0499513
	WT/qnrD chrom/ΔqnrD LB_16	28.6	25.02
	WT/qnrD chrom/ΔqnrD LB_17	28.65	25.07
	WT/qnrD chrom/ΔqnrD LB_18	28.66	25.08
	replicat biologique 6	28.6367	25.0567	3.58	0.0836205
Test 1	WT/qnrD chrom/ΔqnrD TOB_1	28.14	26.88
	WT/qnrD chrom/ΔqnrD TOB_2	28.16	26.92
	WT/qnrD chrom/ΔqnrD TOB_3	28.02	26.95
	replicat biologique 1	28.1067	26.9167	1.19	0.438303			-0.426667	1.34412
	WT/qnrD chrom/ΔqnrD TOB_4	27.3	25.39
	WT/qnrD chrom/ΔqnrD TOB_5	27.71	25.13
	WT/qnrD chrom/ΔqnrD TOB_6	27.72	25.28
	replicat biologique 2	27.5767	25.2667	2.31	0.20166			-1.52667	2.88119
	WT/qnrD chrom/ΔqnrD TOB_7	28.85	25.58
	WT/qnrD chrom/ΔqnrD TOB_8	28.14	24.98
	WT/qnrD chrom/ΔqnrD TOB_9	28.79	24.81
	replicat biologique 3	28.5933	25.1233	3.47	0.0902456			-0.966667	1.95432
	WT/qnrD chrom/ΔqnrD TOB_10	28.75	25.93
	WT/qnrD chrom/ΔqnrD TOB_11	28.68	25.72
	WT/qnrD chrom/ΔqnrD TOB_12	28.07	25.54
	replicat biologique 4	28.5	25.73	2.77	0.146604			-0.95	1.93187
	WT/qnrD chrom/ΔqnrD TOB_13	28.86	25.66
	WT/qnrD chrom/ΔqnrD TOB_14	28.88	25.86
	WT/qnrD chrom/ΔqnrD TOB_15	28.78	25.69
	replicat biologique 5	28.84	25.7367	3.10333	0.11636			-1.22	2.32947
	WT/qnrD chrom/ΔqnrD TOB_16	28.26	25.68
	WT/qnrD chrom/ΔqnrD TOB_17	28.21	25.62
	WT/qnrD chrom/ΔqnrD TOB_18	28.26	25.74
	replicat biologique 6	28.2433	25.68	2.56333	0.169184			-1.01667	2.02324

## Sheet: WT_chrom_qnrD_pDqnrD_MMC vs LB
		Target gene	HKG	ΔCt	2^-ΔCt	2^-ΔCt moy	SD 2^-ΔCt	ΔΔCt	Fold change		MIN 2^-ΔCt	MAX 2^-ΔCt	MAX 2^-ΔΔCt	MIN 2^-ΔΔCt
		qnrD	dxs						2^-ΔΔCt ou ratio des 2^-ΔCt
Calibrator	WT/qnrD chrom/ΔqnrD LB_1	28.7	27.89
	WT/qnrD chrom/ΔqnrD LB_2	28.7	26.64
	WT/qnrD chrom/ΔqnrD LB_3	28.55	26.57
	replicat biologique 1	28.65	27.0333	1.61667	0.326088
	WT/qnrD chrom/ΔqnrD LB_4	28.66	23.12
	WT/qnrD chrom/ΔqnrD LB_5	27.96	24.94
	WT/qnrD chrom/ΔqnrD LB_6	28.12	25.17
	replicat biologique 2	28.2467	24.41	3.83667	0.069992
	WT/qnrD chrom/ΔqnrD LB_7	28.67	25.56
	WT/qnrD chrom/ΔqnrD LB_8	29.45	24.46
	WT/qnrD chrom/ΔqnrD LB_9	29.53	24.32
	replicat biologique 3	29.2167	24.78	4.43667	0.0461775
	WT/qnrD chrom/ΔqnrD LB_10	28.91	24.61
	WT/qnrD chrom/ΔqnrD LB_11	28.32	25.22
	WT/qnrD chrom/ΔqnrD LB_12	28.48	24.72
	replicat biologique 4	28.57	24.85	3.72	0.0758872
	WT/qnrD chrom/ΔqnrD LB_13	28.46	24.52
	WT/qnrD chrom/ΔqnrD LB_14	28.53	24.13
	WT/qnrD chrom/ΔqnrD LB_15	28.64	24.01
	replicat biologique 5	28.5433	24.22	4.32333	0.0499513
	WT/qnrD chrom/ΔqnrD LB_16	28.6	25.02
	WT/qnrD chrom/ΔqnrD LB_17	28.65	25.07
	WT/qnrD chrom/ΔqnrD LB_18	28.66	25.08
	replicat biologique 6	28.6367	25.0567	3.58	0.0836205
Test 1	WT/qnrD chrom/ΔqnrD MMC_1	28.43	25.97
	WT/qnrD chrom/ΔqnrD MMC_2	27	27.599
	WT/qnrD chrom/ΔqnrD MMC_3	27	27.64
	replicat biologique 1	27.4767	27.0697	0.407	0.75419			-1.20967	2.31284
	WT/qnrD chrom/ΔqnrD MMC_4	28.23	25.28
	WT/qnrD chrom/ΔqnrD MMC_5	28.29	25.68
	WT/qnrD chrom/ΔqnrD MMC_6	28.95	25.7
	replicat biologique 2	28.49	25.5533	2.93667	0.13061			-0.9	1.86607
	WT/qnrD chrom/ΔqnrD MMC_7	28.4	25.18
	WT/qnrD chrom/ΔqnrD MMC_8	28.56	25.03
	WT/qnrD chrom/ΔqnrD MMC_9	28.03	25.06
	replicat biologique 3	28.33	25.09	3.24	0.105843			-1.19667	2.29209
	WT/qnrD chrom/ΔqnrD MMC_10	28.71	25.68
	WT/qnrD chrom/ΔqnrD MMC_11	28.54	25.34
	WT/qnrD chrom/ΔqnrD MMC_12	28.59	25.88
	replicat biologique 4	28.6133	25.6333	2.98	0.126745			-0.74	1.67018
	WT/qnrD chrom/ΔqnrD MMC_13	29.98	25.58
	WT/qnrD chrom/ΔqnrD MMC_14	28.62	25.72
	WT/qnrD chrom/ΔqnrD MMC_15	28.41	25.78
	replicat biologique 5	29.0033	25.6933	3.31	0.10083			-1.01333	2.01857
	WT/qnrD chrom/ΔqnrD MMC_16	28.19	25.62
	WT/qnrD chrom/ΔqnrD MMC_17	28.35	25.78
	WT/qnrD chrom/ΔqnrD MMC_18	28.21	25.64
	replicat biologique 6	28.25	25.68	2.57	0.168404			-1.01	2.01391

## Sheet: WT_chrom_qnrD_DqnrD_GM vs LB
		Target gene	HKG	ΔCt	2^-ΔCt	2^-ΔCt moy	SD 2^-ΔCt	ΔΔCt	Fold change
		qnrD	dxs						2^-ΔΔCt
Calibrator	WT/qnrD chrom/ΔqnrD LB_1	28.7	27.89
	WT/qnrD chrom/ΔqnrD LB_2	28.7	26.64
	WT/qnrD chrom/ΔqnrD LB_3	28.55	26.57
	replicat biologique 1	28.65	27.0333	1.61667	0.326088
	WT/qnrD chrom/ΔqnrD LB_4	28.66	23.12
	WT/qnrD chrom/ΔqnrD LB_5	27.96	24.94
	WT/qnrD chrom/ΔqnrD LB_6	28.12	25.17
	replicat biologique 2	28.2467	24.41	3.83667	0.069992
	WT/qnrD chrom/ΔqnrD LB_7	28.67	25.56
	WT/qnrD chrom/ΔqnrD LB_8	29.45	24.46
	WT/qnrD chrom/ΔqnrD LB_9	29.53	24.32
	replicat biologique 3	29.2167	24.78	4.43667	0.0461775
	WT/qnrD chrom/ΔqnrD LB_10	28.91	24.61
	WT/qnrD chrom/ΔqnrD LB_11	28.32	25.22
	WT/qnrD chrom/ΔqnrD LB_12	28.48	24.72
	replicat biologique 4	28.57	24.85	3.72	0.0758872
	WT/qnrD chrom/ΔqnrD LB_13	28.46	24.52
	WT/qnrD chrom/ΔqnrD LB_14	28.53	24.13
	WT/qnrD chrom/ΔqnrD LB_15	28.64	24.01
	replicat biologique 5	28.5433	24.22	4.32333	0.0499513
	WT/qnrD chrom/ΔqnrD LB_16	28.6	25.02
	WT/qnrD chrom/ΔqnrD LB_17	28.65	25.07
	WT/qnrD chrom/ΔqnrD LB_18	28.66	25.08
	replicat biologique 6	28.6367	25.0567	3.58	0.0836205
Test 1	WT/qnrD chrom/ΔqnrD GM_1	28.24	27.12
	WT/qnrD chrom/ΔqnrD GM_2	28.26	27.02
	WT/qnrD chrom/ΔqnrD GM_3	28.22	27.04
	replicat biologique 1	28.24	27.06	1.18	0.441351			-0.436667	1.35347
	WT/qnrD chrom/ΔqnrD GM_4	27.42	25.12
	WT/qnrD chrom/ΔqnrD GM_5	27.48	25.2
	WT/qnrD chrom/ΔqnrD GM_6	27.45	25.22
	replicat biologique 2	27.45	25.18	2.27	0.20733			-1.56667	2.9622
	WT/qnrD chrom/ΔqnrD GM_7	29.16	25.48
	WT/qnrD chrom/ΔqnrD GM_8	29.14	25.36
	WT/qnrD chrom/ΔqnrD GM_9	29.2	25.28
	replicat biologique 3	29.1667	25.3733	3.79333	0.0721262			-0.643333	1.56193
	WT/qnrD chrom/ΔqnrD GM_10	28.65	25.84
	WT/qnrD chrom/ΔqnrD GM_11	28.68	25.72
	WT/qnrD chrom/ΔqnrD GM_12	28.54	25.38
	replicat biologique 4	28.6233	25.6467	2.97667	0.127038			-0.743333	1.67404
	WT/qnrD chrom/ΔqnrD GM_13	28.42	25.66
	WT/qnrD chrom/ΔqnrD GM_14	28.54	25.86
	WT/qnrD chrom/ΔqnrD GM_15	28.7	25.69
	replicat biologique 5	28.5533	25.7367	2.81667	0.141938			-1.50667	2.84153
	WT/qnrD chrom/ΔqnrD GM_16	27.84	25.24
	WT/qnrD chrom/ΔqnrD GM_17	27.92	25.32
	WT/qnrD chrom/ΔqnrD GM_18	27.97	25.37
	replicat biologique 6	27.91	25.31	2.6	0.164938			-0.98	1.97247
