# Supplementary material for: A qnr-plasmid allows aminoglycosides to induce SOS in Escherichia coli
Source: eLife. 2022 Jan 17;11:e69511. doi: 10.7554/eLife.69511 (PMC8789287; doi:10.7554/eLife.69511)
Supplement: Figure 2—source data 5. [file elife-69511-fig2-data5.xlsx]

## Sheet: Feuille 1 - Figure 2-source dat
Figure 2-source data E
	pG644 (SOS GFP)	pG644 (SOS GFP)	pG644 (SOS GFP)	pG644 (SOS GFP)	pG644 (SOS-GFP) + pDIJ09-518a	pG644 (SOS-GFP) + pDIJ09-518a	pG644 (SOS-GFP) + pDIJ09-518a	pG644 (SOS-GFP) + pDIJ09-518a
E. coli WT	0.500813	1.09741	0.682513		2.10494	2.6	3.2025
