# Supplementary material for: A qnr-plasmid allows aminoglycosides to induce SOS in Escherichia coli
Source: eLife. 2022 Jan 17;11:e69511. doi: 10.7554/eLife.69511 (PMC8789287; doi:10.7554/eLife.69511)
Supplement: Figure 3—source data 1. [file elife-69511-fig3-data1.xlsx]

## Sheet: MG1656
	N° of lecture	LB.1	LB.2	LB.3	CIP.1	CIP.2	CIP.3	TOB.1	TOB.2	TOB.3
Assay1.	1	17.5915	18.6722	17.2715	40.2342	41.5045	40.1083
	2	20.7962	18.0713	18.0761	42.7621	41.0841	41.6126
	3	25.497	17.0093	16.0198	51.6395	51.602	45.6525
Assay2.	1	25.7139	28.1899	29.2332	41.6953	43.5694	41.4945	30.689	30.2329	31.0321
	2	25.6694	27.1476	28.3365	41.5638	42.585	41.6489	29.4915	29.2262	30.8745
	3	26.7556	28.8244	27.7823	42.0722	39.0846	40.6093	29.1174	30.2447	28.8076
Assay3.	1	22.8089	24.9728	24.7728	45.1583	46.2387	47.1784	29.8523	29.7004	30.3768
	2	26.6524	26.4791	24.6148	45.6923	47.132	47.6849	30.224	30.9832	28.674
	3	24.0978	24.705	25.3529	45.6808	47.8777	50.6467	34.1969	33.0749	28.5301
Assay4.	1	38.1459	36.7662	37.7913	35.0722	34.7242	34.7353	31.3211	30.3641	29.7524
	2	37.6681	38.1857	34.8225	33.3501	34.4943	35.4595	30.4823	32.7318	29.0713
	3	36.2271	36.5251	37.7855	37.566	35.1966	35.7459	28.5925	28.5588	30.5165
	mean	27.0842			41.9488			30.2489
	ratio on LB				1.54883			1.11685

## Sheet: MG1656-pDIJ
	N° of lecture	LB.1	LB.2	LB.3	CIP.1	CIP.2	CIP.3	TOB.1	TOB.2	TOB.3
Assay1.	1	23.7857	22.6739	25.9781	21.5011	26.155	27.2465
	2	27.4636	28.609	29.6393	24.888	26.4598	28.4451
	3	30.0796	28.2377	28.7101	26.0794	28.0237	30.621
Assay2.	1	15.1354	16.0522	14.8935	11.7822	11.0759	11.2553	13.9811	14.518	13.7008
	2	14.5065	15.6482	15.8642	11.1881	11.8421	11.6739	13.7098	15.1781	13.6905
	3	14.0123	14.491	15.588	12.8419	11.0454	12.345	14.068	14.8372	14.7563
Assay3.	1	26.1706	25.4817	25.6836	27.1222	24.4774	29.3034	25.5954	26.8593	24.1045
	2	24.923	24.5236	28.468	23.8832	25.115	28.4874	24.6647	25.1761	24.798
	3	25.4476	24.7176	26.4974	26.0055	28.5746	26.5407	23.5095	24.1448	26.0998
Assay4.	1	26.346	26.9722	26.4762	26.689	28.8953	26.4832	25.16	26.5732	23.878
	2	26.0433	27.7619	28.4899	25.4956	25.5085	26.8798	24.2965	25.6513	23.9756
	3	27.2481	25.9339	28.4386	26.4573	27.5328	27.1942	23.1656	23.4109	24.9239
	mean	23.8053			22.9198			21.2751
	ratio on LB				0.962803			0.89371
	ratio on WT	0.878937			0.546377			0.703334

## Sheet: data for stat
replicat	plasmide	LB	TOB	CIP		WT		0
1	0	17.5915	30.689	40.2342		WT/pDIJ09-518a		1
2	0	20.7962	29.4915	42.7621		WT/pDIJ09-518a ΔqnrD		2
3	0	25.497	29.1174	51.6395
4	0	25.7139	29.8523	41.6953
5	0	25.6694	30.224	41.5638
6	0	26.7556	34.1969	42.0722
7	0	22.8089	31.3211	45.1583
8	0	26.6524	30.4823	45.6923
9	0	24.0978	28.5925	45.6808
10	0	38.1459	30.2329	35.0722
11	0	37.6681	29.2262	33.3501
12	0	36.2271	30.2447	37.566
13	0	18.6722	29.7004	41.5045
14	0	18.0713	30.9832	41.0841
15	0	17.0093	33.0749	51.602
16	0	28.1899	30.3641	43.5694
17	0	27.1476	32.7318	42.585
18	0	28.8244	28.5588	39.0846
19	0	24.9728	31.0321	46.2387
20	0	26.4791	30.8745	47.132
21	0	24.705	28.8076	47.8777
22	0	36.7662	30.3768	34.7242
23	0	38.1857	28.674	34.4943
24	0	36.5251	28.5301	35.1966
25	0	17.2715	29.7524	40.1083
26	0	18.0761	29.0713	41.6126
27	0	16.0198	30.5165	45.6525
28	0	29.2332		41.4945
29	0	28.3365		41.6489
30	0	27.7823		40.6093
31	0	24.7728		47.1784
32	0	24.6148		47.6849
33	0	25.3529		50.6467
34	0	37.7913		34.7353
35	0	34.8225		35.4595
36	0	37.7855		35.7459
1	1	23.7857	13.9811	21.5011
2	1	27.4636	13.7098	24.888
3	1	30.0796	14.068	26.0794
4	1	15.1354	25.5954	11.7822
5	1	14.5065	24.6647	11.1881
6	1	14.0123	23.5095	12.8419
7	1	26.1706	25.16	27.1222
8	1	24.923	24.2965	23.8832
9	1	25.4476	23.1656	26.0055
10	1	26.346	14.518	26.689
11	1	26.0433	15.1781	25.4956
12	1	27.2481	14.8372	26.4573
13	1	22.6739	26.8593	26.155
14	1	28.609	25.1761	26.4598
15	1	28.2377	24.1448	28.0237
16	1	16.0522	26.5732	11.0759
17	1	15.6482	25.6513	11.8421
18	1	14.491	23.4109	11.0454
19	1	25.4817	13.7008	24.4774
20	1	24.5236	13.6905	25.115
21	1	24.7176	14.7563	28.5746
22	1	26.9722	24.1045	28.8953
23	1	27.7619	24.798	25.5085
24	1	25.9339	26.0998	27.5328
25	1	25.9781	23.878	27.2465
26	1	29.6393	23.9756	28.4451
27	1	28.7101	24.9239	30.621
28	1	14.8935		11.2553
29	1	15.8642		11.6739
30	1	15.588		12.345
31	1	25.6836		29.3034
32	1	28.468		28.4874
33	1	26.4974		26.5407
34	1	26.4762		26.4832
35	1	28.4899		26.8798
36	1	28.4386		27.1942
1	2	22.411	12.2337	48.9862
2	2	22.4662	12.6773	52.7114
3	2	21.5255	13.983	59.3908
4	2	14.6396	18.5383	26.3501
5	2	14.9239	18.8642	28.1823
6	2	13.965	19.0327	27.6856
7	2	19.3932	26.6212	24.737
8	2	20.1434	27.5768	25.6982
9	2	19.0955	27.392	27.5344
10	2	28.9548	13.0501	36.4673
11	2	29.7044	13.923	38.8451
12	2	28.3538	12.6289	39.015
13	2	24.3641	18.1229	52.7383
14	2	21.3924	18.1314	58.1939
15	2	22.7268	18.4971	65.5031
16	2	15.0353	25.713	27.0565
17	2	14.5442	26.2886	28.5038
18	2	14.6936	25.9195	27.4011
19	2	20.0542	13.8149	25.5698
20	2	19.3202	14.3667	22.5652
21	2	20.2241	12.5876	26.4168
22	2	27.093	19.2963	37.9728
23	2	26.6346	17.8694	38.6508
24	2	29.7608	20.1461	38.2705
25	2	29.5904	26.6156	60.1195
26	2	31.1845	27.4451	58.9162
27	2	32.0863	25.3766	61.6934
28	2	15.4087		29.2838
29	2	15.0144		28.2433
30	2	15.2163		29.7568
31	2	19.733		25.5642
32	2	18.7834		23.072
33	2	20.4354		27.3967
34	2	29.0503		36.6482
35	2	29.4107		36.1128
36	2	28.3396		35.5712

## Sheet: raw data stat
Tukey's multiple comparisons test	Mean Diff,	95% CI of diff,	Significant?	Summary
LB:WT vs. LB:WT/pDIJ09-518a	3.279	-1,839 to 8,396	No	ns
LB:WT vs. LB:WT/pDIJ09-518a ΔqnrD	4.982	-0,1353 to 10,10	No	ns
LB:WT vs. TOB:WT	-3.165	-8,692 to 2,363	No	ns
LB:WT vs. TOB:WT/pDIJ09-518a	5.809	0,2816 to 11,34	Yes	*
LB:WT vs. TOB:WT/pDIJ09-518a ΔqnrD	7.576	2,049 to 13,10	Yes	***
LB:WT vs. CIP:WT	-14.86	-19,98 to -9,747	Yes	****
LB:WT vs. CIP:WT/pDIJ09-518a	4.164	-0,9532 to 9,282	No	ns
LB:WT vs. CIP:WT/pDIJ09-518a ΔqnrD	-10.05	-15,17 to -4,932	Yes	****
LB:WT/pDIJ09-518a vs. LB:WT/pDIJ09-518a ΔqnrD	1.703	-3,414 to 6,821	No	ns
LB:WT/pDIJ09-518a vs. TOB:WT	-6.444	-11,97 to -0,9160	Yes	**
LB:WT/pDIJ09-518a vs. TOB:WT/pDIJ09-518a	2.53	-2,997 to 8,058	No	ns
LB:WT/pDIJ09-518a vs. TOB:WT/pDIJ09-518a ΔqnrD	4.297	-1,230 to 9,825	No	ns
LB:WT/pDIJ09-518a vs. CIP:WT	-18.14	-23,26 to -13,03	Yes	****
LB:WT/pDIJ09-518a vs. CIP:WT/pDIJ09-518a	0.8855	-4,232 to 6,003	No	ns
LB:WT/pDIJ09-518a vs. CIP:WT/pDIJ09-518a ΔqnrD	-13.33	-18,45 to -8,211	Yes	****
LB:WT/pDIJ09-518a ΔqnrD vs. TOB:WT	-8.147	-13,67 to -2,619	Yes	***
LB:WT/pDIJ09-518a ΔqnrD vs. TOB:WT/pDIJ09-518a	0.8269	-4,701 to 6,355	No	ns
LB:WT/pDIJ09-518a ΔqnrD vs. TOB:WT/pDIJ09-518a ΔqnrD	2.594	-2,933 to 8,122	No	ns
LB:WT/pDIJ09-518a ΔqnrD vs. CIP:WT	-19.85	-24,96 to -14,73	Yes	****
LB:WT/pDIJ09-518a ΔqnrD vs. CIP:WT/pDIJ09-518a	-0.8178	-5,935 to 4,300	No	ns
LB:WT/pDIJ09-518a ΔqnrD vs. CIP:WT/pDIJ09-518a ΔqnrD	-15.03	-20,15 to -9,914	Yes	****
TOB:WT vs. TOB:WT/pDIJ09-518a	8.974	3,065 to 14,88	Yes	***
TOB:WT vs. TOB:WT/pDIJ09-518a ΔqnrD	10.74	4,832 to 16,65	Yes	****
TOB:WT vs. CIP:WT	-11.7	-17,23 to -6,172	Yes	****
TOB:WT vs. CIP:WT/pDIJ09-518a	7.329	1,801 to 12,86	Yes	**
TOB:WT vs. CIP:WT/pDIJ09-518a ΔqnrD	-6.885	-12,41 to -1,358	Yes	**
TOB:WT/pDIJ09-518a vs. TOB:WT/pDIJ09-518a ΔqnrD	1.767	-4,142 to 7,676	No	ns
TOB:WT/pDIJ09-518a vs. CIP:WT	-20.67	-26,20 to -15,15	Yes	****
TOB:WT/pDIJ09-518a vs. CIP:WT/pDIJ09-518a	-1.645	-7,172 to 3,883	No	ns
TOB:WT/pDIJ09-518a vs. CIP:WT/pDIJ09-518a ΔqnrD	-15.86	-21,39 to -10,33	Yes	****
TOB:WT/pDIJ09-518a ΔqnrD vs. CIP:WT	-22.44	-27,97 to -16,91	Yes	****
TOB:WT/pDIJ09-518a ΔqnrD vs. CIP:WT/pDIJ09-518a	-3.412	-8,940 to 2,116	No	ns
TOB:WT/pDIJ09-518a ΔqnrD vs. CIP:WT/pDIJ09-518a ΔqnrD	-17.63	-23,15 to -12,10	Yes	****
CIP:WT vs. CIP:WT/pDIJ09-518a	19.03	13,91 to 24,15	Yes	****
CIP:WT vs. CIP:WT/pDIJ09-518a ΔqnrD	4.815	-0,3027 to 9,932	No	ns
CIP:WT/pDIJ09-518a vs. CIP:WT/pDIJ09-518a ΔqnrD	-14.21	-19,33 to -9,097	Yes	****

## Sheet: conclusion
Tukey's multiple comparisons test	Mean Diff,	95% CI of diff,	Significant?	Summary
					Quel est l'effet de l'ATB sur la production de ROS?
LB:WT vs. TOB:WT	-3.165	-8,692 to 2,363	No	ns	Tobra induit production de ROS chez E. coli. On confirme la littérature
LB:WT vs. CIP:WT	-14.86	-19,98 to -9,747	Yes	****	Cipro induit production de ROS chez E. coli. On confirme la littérature
					pDIJ induit-il la formation de ROS?
LB:WT vs. LB:WT/pDIJ09-518a	3.279	-1,839 to 8,396	No	ns	pDIJ n'induit pas la production de ROS chez E. coli
LB:WT vs. LB:WT/pDIJ09-518a ΔqnrD	4.982	-0,1353 to 10,10	No	ns
LB:WT/pDIJ09-518a vs. LB:WT/pDIJ09-518a ΔqnrD	1.703	-3,414 to 6,821	No	ns
					QnrD permet-elle de limiter la production de ROS?
CIP:WT vs. CIP:WT/pDIJ09-518a	19.03	13,91 to 24,15	Yes	****	porter pDIJ avec qnrD diminue la production de ROS chez E. coli exposée à la cipro
CIP:WT/pDIJ09-518a vs. CIP:WT/pDIJ09-518a ΔqnrD	-14.21	-19,33 to -9,097	Yes	****	porter pDIJ sans qnrD ne diminue pas la prodution de ROS chez E. coli exposée à la cipro
CIP:WT vs. CIP:WT/pDIJ09-518a ΔqnrD	4.815	-0,3027 to 9,932	No	ns	la production de ROS due à la cipro est similaire quand le plasmide ne possède pas qnrD
LB:WT/pDIJ09-518a vs. CIP:WT/pDIJ09-518a	0.8855	-4,232 to 6,003	No	ns	porter pDIJ avec qnrD permet à E. coli de contenir la production de ROS en présence de cipro
LB:WT/pDIJ09-518a ΔqnrD vs. CIP:WT/pDIJ09-518a ΔqnrD	-15.03	-20,15 to -9,914	Yes	****	porter pDIJ sans qnrD ne permet pas à E. coli de contenir la production de ROS en présence de cipro
LB:WT/pDIJ09-518a vs. TOB:WT/pDIJ09-518a	2.53	-2,997 to 8,058	No	ns	tobra n'augmente pas ROS chez E. coli portant pDIJ avec qnrD
LB:WT/pDIJ09-518a vs. TOB:WT/pDIJ09-518a ΔqnrD	4.297	-1,230 to 9,825	No	ns	tobra naugmente pas ROS chez E. coli portant pDIJ sans qnrD
