# Supplementary material for: A qnr-plasmid allows aminoglycosides to induce SOS in Escherichia coli
Source: eLife. 2022 Jan 17;11:e69511. doi: 10.7554/eLife.69511 (PMC8789287; doi:10.7554/eLife.69511)
Supplement: Figure 3—source data 2. [file elife-69511-fig3-data2.xlsx]

## Sheet: wt katG H2O2 vs LB
		Target gene	HKG	ΔCt	2^-ΔCt	2^-ΔCt moy	SD 2^-ΔCt	ΔΔCt	Fold change
		katG	dxs						2^-ΔΔCt
Calibrator	WT_LB 1	12.96	16.9
	WT_LB 2	12.94	16.77
	WT_LB 3	13.4	16.88
	replicat bio 1	13.1	16.85	-3.75	13.4543
	WT_LB 4	13.4	16.93
	WT_LB 5	12.78	16.88
	WT_LB 6	12.94	16.84
	replicat bio 2	13.04	16.8833	-3.84333	14.3535
Test 1	WT_H2O2_10 1	10.52	15.3
	WT_H2O2_10 2	9.99	14.95
	WT_H2O2_10 3	10.44	15.41
	replicat bio 1	10.3167	15.22	-4.90333	29.9261			-1.15333	2.22427
	WT_H2O2_10 4	10.37	15.73
	WT_H2O2_10 5	10	15.81
	WT_H2O2_10 6	9.88	15.74
	replicat bio 2	10.0833	15.76	-5.67667	51.1502			-1.83333	3.56359

## Sheet: wt dij katG H2O2 vs LB
		Target gene	HKG	ΔCt	2^-ΔCt	2^-ΔCt moy	SD 2^-ΔCt	ΔΔCt	Fold change
		katG	dxs						2^-ΔΔCt
Calibrator	WT/pDIJ_LB 1	12.61	16.37
	WT/pDIJ_LB 2	12.39	16.37
	WT/pDIJ_LB 3	12.32	16.53
	replicat bio 1	12.44	16.4233	-3.98333	15.8162
	WT/pDIJ_LB 4	13.44	16.72
	WT/pDIJ_LB 5	13.44	16.52
	WT/pDIJ_LB 6	11.51	16.51
	replicat bio 2	12.7967	16.5833	-3.78667	13.8007
Test 1	WT/pDIJ_H2O2_10 1	11.59	15.76
	WT/pDIJ_H2O2_10 2	11.52	15.76
	WT/pDIJ_H2O2_10 3	11.56	15.76
	replicat bio 1	11.5567	15.76	-4.20333	18.4217			-0.22	1.16473
	WT/pDIJ_H2O2_10 4	10.41	15.42
	WT/pDIJ_H2O2_10 5	9.94	15.42
	WT/pDIJ_H2O2_10 6	10.32	15.42
	replicat bio 2	10.2233	15.42	-5.19667	36.6735			-1.41	2.65737

## Sheet: wt katG TOB vs LB
		Target gene	HKG	ΔCt	2^-ΔCt	2^-ΔCt moy	SD 2^-ΔCt	ΔΔCt	Fold change
		katG	dxs						2^-ΔΔCt
Calibrator	WT_LB 1	13.3	16.45
	WT_LB 2	13.36	16.53
	WT_LB 3	13.5	16.27
	replicat bio 1	13.3867	16.4167	-3.03	8.1681
	WT_LB 4	13.7	16.6
	WT_LB 5	13.55	16.6
	WT_LB 6	13.69	16.61
	replicat bio 2	13.6467	16.6033	-2.95667	7.76328
Test 2	WT_TOB 1	13.64	16.87
	WT_TOB 2	13.62	16.75
	WT_TOB 3	13.5	16.71
	replicat bio 1	13.5867	16.7767	-3.19	9.12611			-0.16	1.11729
	WT_TOB 4	13.86	16.66
	WT_TOB 5	13.73	16.73
	WT_TOB 6	13.57	16.48
	replicat bio 2	13.72	16.6233	-2.90333	7.48153			0.0533333	0.963707

## Sheet: wt dij katG TOB vs LB
		Target gene	HKG	ΔCt	2^-ΔCt	2^-ΔCt moy	SD 2^-ΔCt	ΔΔCt	Fold change
		katG	dxs						2^-ΔΔCt
Calibrator	WT/pDIJ09-518a_LB 1	13.59	16.33
	WT/pDIJ09-518a_LB 2	13.41	15.93
	WT/pDIJ09-518a_LB 3	13.59	15.86
	replicat bio 1	13.53	16.04	-2.51	5.6962
	WT/pDIJ09-518a_LB 4	13.54	16.58
	WT/pDIJ09-518a_LB 5	13.59	16.53
	WT/pDIJ09-518a_LB 6	13.44	15.92
	replicat bio 2	13.5233	16.3433	-2.82	7.06162
Test 2	WT/pDIJ09-518a_TOB 1	13.77	16.58
	WT/pDIJ09-518a_TOB 2	13.5	15.79
	WT/pDIJ09-518a_TOB 3	13.79	16.41
	replicat bio 1	13.6867	16.26	-2.57333	5.95183			-0.0633333	1.04488
	WT/pDIJ09-518a_TOB 4	13.42	15.97
	WT/pDIJ09-518a_TOB 5	13.46	15.94
	WT/pDIJ09-518a_TOB 6	13.28	15.97
	replicat bio 2	13.3867	15.96	-2.57333	5.95183			0.246667	0.842842
