# Supplementary material for: A qnr-plasmid allows aminoglycosides to induce SOS in Escherichia coli
Source: eLife. 2022 Jan 17;11:e69511. doi: 10.7554/eLife.69511 (PMC8789287; doi:10.7554/eLife.69511)
Supplement: Figure 3—source data 3. [file elife-69511-fig3-data3.xlsx]

## Sheet: wt
SOUCHE_ASSAY_TRIPLICATE	LB				DAF				DAF+TOB
WT_1_1	8.11859	8.83145	6.47934		11.1813	11.3964	11.6199		10.8905	10.0546	7.77699
WT_1_2	7.45427	8.45974	9.41143		13.8192	12.2043	12.6609		11.9401	10.3079	12.51
WT_1_3	7.99092	8.03204	7.66138		11.9016	12.0825	12.127		8.05932	9.73472	10.7909
WT_2_1	10.3939	15.8265	13.9423		25.0099	19.9691	28.2948		26.1694	19.9028	26.2182
WT_2_2	14.0204	18.7184	12.9957		30.2241	23.9718	23.9657		23.1858	24.0205	24.6637
WT_2_3	14.2073	15.3452	13.6673		16.8584	22.8091	23.2033		17.3091	23.0909	21.3563
mean			11.1976				17.9611				16.5545
substraction LB							6.76351				5.35698

## Sheet: wt pDIJ
SOUCHE_ASSAY_TRIPLICATE	LB				DAF				DAF+TOB
WT/pDIJ_1_1	5.71398	7.46324	6.87987		31.3547	33.3066	32.7192		39.1226	36.1037	42.0247
WT/pDIJ_1_2	9.64693	7.72271	8.28166		32.6056	33.012	30.5121		36.7949	42.3688	42.8743
WT/pDIJ_1_3	7.65015	7.4884	8.08683		31.2642	30.0931	31.8772		37.4025	37.1837	38.1378
WT/pDIJ_2_1	14.1631	10.4652	11.9281		25.1276	18.7423	17.2288		19.3142	28.6626	21.7419
WT/pDIJ_2_2	15.3459	16.152	12.1183		27.6934	22.2703	22.8582		29.9788	23.0582	27.1508
WT/pDIJ_2_3	14.0399	11.7323	13.077		20.03	25.2078	19.9962		21.7033	23.2897	20.8446
mean			10.442				26.9944				31.5421
substraction LB							16.5524				21.1001
