# Supplementary material for: A qnr-plasmid allows aminoglycosides to induce SOS in Escherichia coli
Source: eLife. 2022 Jan 17;11:e69511. doi: 10.7554/eLife.69511 (PMC8789287; doi:10.7554/eLife.69511)
Supplement: Figure 3—source data 4. [file elife-69511-fig3-data4.xlsx]

## Sheet: 16072019anadafP2percent
Full path	Time	Date	%-#
16072019.0001\P1\P2	14:39:00	2019-Jul-16	20.89	WT
16072019.0002\P1\P2	14:40:00	2019-Jul-16	22.44	WT
16072019.0003\P1\P2	14:41:00	2019-Jul-16	22.84	WT
16072019.0004\P1\P2	14:42:00	2019-Jul-16	21.27	WT
16072019.0005\P1\P2	14:42:00	2019-Jul-16	22.73	WT
16072019.0006\P1\P2	14:43:00	2019-Jul-16	20.71	WT	carbox
16072019.0007\P1\P2	14:44:00	2019-Jul-16	20.15	WT	carbox
16072019.0008\P1\P2	14:45:00	2019-Jul-16	22.04	WT	carbox
16072019.0009\P1\P2	14:46:00	2019-Jul-16	19.77	WT	carbox
16072019.0010\P1\P2	14:47:00	2019-Jul-16	20.06	WT	carbox
16072019.0011\P1\P2	14:48:00	2019-Jul-16	19.38	WT	TOB
16072019.0012\P1\P2	14:49:00	2019-Jul-16	20.39	WT	TOB
16072019.0013\P1\P2	14:50:00	2019-Jul-16	20.85	WT	TOB
16072019.0014\P1\P2	14:51:00	2019-Jul-16	21.2	WT	TOB
16072019.0015\P1\P2	14:52:00	2019-Jul-16	19.62	WT	TOB
16072019.0016\P1\P2	14:53:00	2019-Jul-16	19.2	WT	TOB carbox
16072019.0017\P1\P2	14:54:00	2019-Jul-16	20.32	WT	TOB carbox
16072019.0018\P1\P2	14:55:00	2019-Jul-16	19.41	WT	TOB carbox
16072019.0019\P1\P2	14:56:00	2019-Jul-16	20.24	WT	TOB carbox
16072019.0020\P1\P2	14:57:00	2019-Jul-16	21.42	WT	TOB carbox
16072019.0021\P1\P2	14:58:00	2019-Jul-16	23.25	DIJ
16072019.0022\P1\P2	15:00:00	2019-Jul-16	24.93	DIJ
16072019.0023\P1\P2	15:01:00	2019-Jul-16	29.02	DIJ
16072019.0024\P1\P2	15:02:00	2019-Jul-16	26.11	DIJ
16072019.0025\P1\P2	15:04:00	2019-Jul-16	25.91	DIJ
16072019.0026\P1\P2	15:06:00	2019-Jul-16	23.53	DIJ	carbox
16072019.0027\P1\P2	15:07:00	2019-Jul-16	30.12	DIJ	carbox
16072019.0028\P1\P2	15:08:00	2019-Jul-16	17.52	DIJ	carbox
16072019.0029\P1\P2	15:09:00	2019-Jul-16	25.85	DIJ	carbox
16072019.0030\P1\P2	15:10:00	2019-Jul-16	23.42	DIJ	carbox
16072019.0031\P1\P2	15:12:00	2019-Jul-16	22.64	DIJ	TOB
16072019.0032\P1\P2	15:13:00	2019-Jul-16	27.03	DIJ	TOB
16072019.0033\P1\P2	15:14:00	2019-Jul-16	21.38	DIJ	TOB
16072019.0034\P1\P2	15:15:00	2019-Jul-16	22.23	DIJ	TOB
16072019.0035\P1\P2	15:17:00	2019-Jul-16	23.18	DIJ	TOB
16072019.0036\P1\P2	15:18:00	2019-Jul-16	20.8	DIJ	TOB carbox
16072019.0037\P1\P2	15:19:00	2019-Jul-16	18.88	DIJ	TOB carbox
16072019.0038\P1\P2	15:20:00	2019-Jul-16	19.84	DIJ	TOB carbox
16072019.0039\P1\P2	15:22:00	2019-Jul-16	16.36	DIJ	TOB carbox
16072019.0040\P1\P2	15:23:00	2019-Jul-16	19.78	DIJ	TOB carbox
16072019.0041\P1\P2	15:24:00	2019-Jul-16	0.1	no fl
