# Supplementary material for: A qnr-plasmid allows aminoglycosides to induce SOS in Escherichia coli
Source: eLife. 2022 Jan 17;11:e69511. doi: 10.7554/eLife.69511 (PMC8789287; doi:10.7554/eLife.69511)
Supplement: Figure 4—figure supplement 1—source data 1. [file elife-69511-fig4-figsupp1-data1.xlsx]

## Sheet: Dhmp vs WT LB
		Target gene	HKG	ΔCt	2^-ΔCt	2^-ΔCt moy	SD 2^-ΔCt	ΔΔCt	Fold change
		sfiA	dxs						2^-ΔΔCt
Calibrator	WT_LB 1	22.18	22.69
	WT_LB 2	22.14	22.82
	WT_LB 3	22.09	23.03
	replicat bio 1	22.1367	22.8467	-0.71	1.6358
	WT_LB 4	22.18	22.69
	WT_LB 5	22.14	22.82
	WT_LB 6	22.09	23.03
	replicat bio 2	22.1367	22.8467	-0.71	1.6358
	WT_LB 7	22.18	22.69
	WT_LB 8	22.14	22.82
	WT_LB 9	22.09	23.03
	replicat bio 3	22.1367	22.8467	-0.71	1.6358
	WT_LB 10	21.52	21.38
	WT_LB 11	21.46	21.53
	WT_LB 12	21.49	21.48
	replicat bio 4	21.49	21.4633	0.0266667	0.981686
	WT_LB 13	21.89	22.56
	WT_LB 14	21.67	22.34
	WT_LB 15	21.99	22.44
	replicat bio 5	21.85	22.4467	-0.596667	1.51222
	WT_LB 16	21.45	22.78
	WT_LB 17	21.44	22.12
	WT_LB 18	21.37	22.75
	replicat bio 6	21.42	22.55	-1.13	2.18859
Test 1	Δhmp_LB 1	22.51	22.04
	Δhmp_LB 2	22.63	22.01
	Δhmp_LB 3	22.51	22.05
	replicat bio 1	22.55	22.0333	0.516667	0.698985			1.22667	0.427304
	Δhmp_LB 4	22.07	21.87
	Δhmp_LB 5	22.24	21.74
	Δhmp_LB 6	22.16	21.79
	replicat bio 2	22.1567	21.8	0.356667	0.780967			1.06667	0.477421
	Δhmp_LB 7	22.48	22.04
	Δhmp_LB 8	22.63	22.01
	Δhmp_LB 9	22.52	22.05
	replicat bio 3	22.5433	22.0333	0.51	0.702222			1.22	0.429283
	Δhmp_LB 10	22.25	21.87
	Δhmp_LB 11	22.24	21.84
	Δhmp_LB 12	22.16	21.79
	replicat bio 4	22.2167	21.8333	0.383333	0.766664			0.356667	0.780967
	Δhmp_LB 13	22.36	21.86
	Δhmp_LB 14	22.14	21.96
	Δhmp_LB 15	22.43	21.95
	replicat bio 5	22.31	21.9233	0.386667	0.764895			0.983333	0.50581
	Δhmp_LB 16	21.87	21.76
	Δhmp_LB 17	21.86	21.78
	Δhmp_LB 18	21.98	22.66
	replicat bio 6	21.9033	22.0667	-0.163333	1.11987			0.966667	0.511687

## Sheet: WT_pTOPO vs WT LB
		Target gene	HKG	ΔCt	2^-ΔCt	2^-ΔCt moy	SD 2^-ΔCt	ΔΔCt	Fold change
		sfiA	dxs						2^-ΔΔCt
Calibrator	WT_LB 1	22.51	22.04
	WT_LB 2	22.63	22.01
	WT_LB 3	22.51	22.05
	replicat bio 1	22.55	22.0333	0.516667	0.698985
	WT_LB 4		21.87
	WT_LB 5	22.07	21.74
	WT_LB 6	22.24	21.79
	replicat bio 2	22.155	21.8	0.355	0.78187
	WT_LB 7	22.18	22.69
	WT_LB 8	22.14	22.82
	WT_LB 9	22.09	23.03
	replicat bio 3	22.1367	22.8467	-0.71	1.6358
	WT_LB 10	22.18	22.69
	WT_LB 11	22.14	22.82
	WT_LB 12	22.09	23.03
	replicat bio 4	22.1367	22.8467	-0.71	1.6358
	WT_LB 13	22.25	22.38
	WT_LB 14	22.15	22.23
	WT_LB 15	22.19	22.38
	replicat bio 5	22.1967	22.33	-0.133333	1.09682
	WT_LB 16	22.43	22.67
	WT_LB 17	22.32	22.65
	WT_LB 18	22.18	22.45
	replicat bio 6	22.31	22.59	-0.28	1.21419
Test 1	WT/TOPO_LB 1	23.68	23.04
	WT/TOPO_LB 2	23.61	22.85
	WT/TOPO_LB 3	23.68	22.89
	replicat bio 1	23.6567	22.9267	0.73	0.602904			0.213333	0.862542
	WT/TOPO_LB 4	23.51	22.72
	WT/TOPO_LB 5	23.09	22.74
	WT/TOPO_LB 6	23.15	22.65
	replicat bio 2	23.25	22.7033	0.546667	0.6846			0.191667	0.875594
	WT/TOPO_LB 7	23.42	23.04
	WT/TOPO_LB 8	23.32	22.85
	WT/TOPO_LB 9	23.28	22.89
	replicat bio 3	23.34	22.9267	0.413333	0.750886			1.12333	0.459032
	WT/TOPO_LB 10	23.51	23.72
	WT/TOPO_LB 11	23.09	23.54
	WT/TOPO_LB 12	23.15	23.56
	replicat bio 4	23.25	23.6067	-0.356667	1.28046			0.353333	0.782773
	WT/TOPO_LB 13	23.12	22.29
	WT/TOPO_LB 14	23.09	23.01
	WT/TOPO_LB 15	23.09	23.04
	replicat bio 5	23.1	22.78	0.32	0.80107			0.453333	0.730353
	WT/TOPO_LB 16	23.55	23.35
	WT/TOPO_LB 17	23.48	23.26
	WT/TOPO_LB 18	23.57	23.44
	replicat bio 6	23.5333	23.35	0.183333	0.880666			0.463333	0.725309

## Sheet: wt_pTOPO_pDIJ vs WT_pDIJ LB
		Target gene	HKG	ΔCt	2^-ΔCt	2^-ΔCt moy	SD 2^-ΔCt	ΔΔCt	Fold change
		sfiA	dxs						2^-ΔΔCt
Calibrator	WT/DIJ/TOPO_LB 1	24.06	24.3
	WT/DIJ/TOPO_LB 2	23.34	24.23
	WT/DIJ/TOPO_LB 3	23.78	24.21
	replicat bio 1	23.7267	24.2467	-0.52	1.43396
	WT/DIJ/TOPO_LB 4	21.72	22.02
	WT/DIJ/TOPO_LB 5	20.6	22.27
	WT/DIJ/TOPO_LB 6	20.71	21.76
	replicat bio 2	21.01	22.0167	-1.00667	2.00926
	WT/DIJ/TOPO_LB 7	22.61	21.49
	WT/DIJ/TOPO_LB 8	22.21	21.5
	WT/DIJ/TOPO_LB 9	22.36	21.2
	replicat bio 3	22.3933	21.3967	0.996667	0.501157
	WT/DIJ/TOPO_LB 10	21.98	22.09
	WT/DIJ/TOPO_LB 11	21.9	21.76
	WT/DIJ/TOPO_LB 12	21.88	21.92
	replicat bio 4	21.92	21.9233	-0.00333333	1.00231
	WT/DIJ/TOPO_LB 13	22.25	22.38
	WT/DIJ/TOPO_LB 14	22.21	22.34
	WT/DIJ/TOPO_LB 15	22.25	22.38
	replicat bio 5	22.2367	22.3667	-0.13	1.09429
	WT/DIJ/TOPO_LB 16	21.4	21.53
	WT/DIJ/TOPO_LB 17	21.13	21.26
	WT/DIJ/TOPO_LB 18	21.17	21.28
	replicat bio 6	21.2333	21.3567	-0.123333	1.08925
Test 1	WT/DIJ_LB 1	20.92	19.65
	WT/DIJ_LB 2	20.89	19.48
	WT/DIJ_LB 3	20.92	19.34
	replicat bio 1	20.91	19.49	1.42	0.373712			1.94	0.260616
	WT/DIJ_LB 4	21.02	19.98
	WT/DIJ_LB 5	21.09	19.7
	WT/DIJ_LB 6	20.92	19.65
	replicat bio 2	21.01	19.7767	1.23333	0.425334			2.24	0.211686
	WT/DIJ_LB 7	20.82	19.32
	WT/DIJ_LB 8	20.89	19.26
	WT/DIJ_LB 9	20.915	19.22
	replicat bio 3	20.875	19.2667	1.60833	0.327977			0.611667	0.65444
	WT/DIJ_LB 10	21.52	19.38
	WT/DIJ_LB 11	21.46	19.53
	WT/DIJ_LB 12	21.49	19.43
	replicat bio 4	21.49	19.4467	2.04333	0.242603			2.04667	0.242043
	WT/DIJ_LB 13	20.99	19.42
	WT/DIJ_LB 14	20.94	19.37
	WT/DIJ_LB 15	21.02	19.45
	replicat bio 5	20.9833	19.4133	1.57	0.336808			1.7	0.307786
	WT/DIJ_LB 16	21.12	19.56
	WT/DIJ_LB 17	21.09	19.34
	WT/DIJ_LB 18	21.08	19.36
	replicat bio 6	21.0967	19.42	1.67667	0.312805			1.8	0.287175
