# Supplementary material for: A qnr-plasmid allows aminoglycosides to induce SOS in Escherichia coli
Source: eLife. 2022 Jan 17;11:e69511. doi: 10.7554/eLife.69511 (PMC8789287; doi:10.7554/eLife.69511)
Supplement: Figure 4—figure supplement 1—source data 2. [file elife-69511-fig4-figsupp1-data2.xlsx]

## Sheet: sfiA wt_pDIJ_pTOPO TOB vs LB
		Target gene	HKG	ΔCt	2^-ΔCt	2^-ΔCt moy	SD 2^-ΔCt	ΔΔCt	Fold change
		sfiA	dxs						2^-ΔΔCt
Calibrator	WT/DIJ/TOPO_LB 1	24.06	24.3
	WT/DIJ/TOPO_LB 2	23.34	24.23
	WT/DIJ/TOPO_LB 3	23.78	24.21
	replicat bio 1	23.7267	24.2467	-0.52	1.43396
	WT/DIJ/TOPO_LB 4	21.72	22.02
	WT/DIJ/TOPO_LB 5	20.6	22.27
	WT/DIJ/TOPO_LB 6	20.71	21.76
	replicat bio 2	21.01	22.0167	-1.00667	2.00926
	WT/DIJ/TOPO_LB 7	22.61	21.49
	WT/DIJ/TOPO_LB 8	22.21	21.5
	WT/DIJ/TOPO_LB 9	22.36	21.2
	replicat bio 3	22.3933	21.3967	0.996667	0.501157
	WT/DIJ/TOPO_LB 10	21.98	22.09
	WT/DIJ/TOPO_LB 11	21.9	21.76
	WT/DIJ/TOPO_LB 12	21.88	21.92
	replicat bio 4	21.92	21.9233	-0.00333333	1.00231
	WT/DIJ/TOPO_LB 13	22.25	22.38
	WT/DIJ/TOPO_LB 14	22.21	22.34
	WT/DIJ/TOPO_LB 15	22.25	22.38
	replicat bio 5	22.2367	22.3667	-0.13	1.09429
	WT/DIJ/TOPO_LB 16	21.4	21.53
	WT/DIJ/TOPO_LB 17	21.13	21.26
	WT/DIJ/TOPO_LB 18	21.17	21.28
	replicat bio 6	21.2333	21.3567	-0.123333	1.08925
Test 1	WT/DIJ/TOPO_TOB 1	21.34	23.59
	WT/DIJ/TOPO_TOB 2	21.42	23.7
	WT/DIJ/TOPO_TOB 3	22.75	23.75
	replicat bio 1	21.8367	23.68	-1.84333	3.58838			-1.32333	2.50244
	WT/DIJ/TOPO_TOB 4	21.29	23.89
	WT/DIJ/TOPO_TOB 5	21.22	23.68
	WT/DIJ/TOPO_TOB 6	21.28	23.78
	replicat bio 2	21.2633	23.7833	-2.52	5.73582			-1.51333	2.85469
	WT/DIJ/TOPO_TOB 7	21.05	22.48
	WT/DIJ/TOPO_TOB 8	21.12	22.48
	WT/DIJ/TOPO_TOB 9	21.08	22.41
	replicat bio 3	21.0833	22.4567	-1.37333	2.59068			-2.37	5.16941
	WT/DIJ/TOPO_TOB 10	20.45	22.08
	WT/DIJ/TOPO_TOB 11	20.39	22.05
	WT/DIJ/TOPO_TOB 12	20.45	21.99
	replicat bio 4	20.43	22.04	-1.61	3.05252			-1.60667	3.04547
	WT/DIJ/TOPO_TOB 13	20.66	22.49
	WT/DIJ/TOPO_TOB 14	20.59	22.42
	WT/DIJ/TOPO_TOB 15	20.55	22.38
	replicat bio 5	20.6	22.43	-1.83	3.55537			-1.7	3.24901
	WT/DIJ/TOPO_TOB 16	20.28	22.24
	WT/DIJ/TOPO_TOB 17	20.34	22.02
	WT/DIJ/TOPO_TOB 18	20.25	22.08
	replicat bio 6	20.29	22.1133	-1.82333	3.53898			-1.7	3.24901

## Sheet: sfiA_dhmp TOB vs LB
		Target gene	HKG	ΔCt	2^-ΔCt	2^-ΔCt moy	SD 2^-ΔCt	ΔΔCt	Fold change
		sfiA	dxs						2^-ΔΔCt
Calibrator	Δhmp_LB 1	22.51	22.04
	Δhmp_LB 2	22.63	22.01
	Δhmp_LB 3	22.51	22.05
	replicat bio 1	22.55	22.0333	0.516667	0.698985
	Δhmp_LB 4	22.07	21.87
	Δhmp_LB 5	22.24	21.74
	Δhmp_LB 6	22.16	21.79
	replicat bio 2	22.1567	21.8	0.356667	0.780967
	Δhmp_LB 7	22.48	22.04
	Δhmp_LB 8	22.63	22.01
	Δhmp_LB 9	22.52	22.05
	replicat bio 3	22.5433	22.0333	0.51	0.702222
	Δhmp_LB 10	22.25	21.87
	Δhmp_LB 11	22.24	21.84
	Δhmp_LB 12	22.16	21.79
	replicat bio 4	22.2167	21.8333	0.383333	0.766664
	Δhmp_LB 13	22.36	21.86
	Δhmp_LB 14	22.14	21.96
	Δhmp_LB 15	22.43	21.95
	replicat bio 5	22.31	21.9233	0.386667	0.764895
	Δhmp_LB 16	21.87	21.76
	Δhmp_LB 17	21.86	21.78
	Δhmp_LB 18	21.98	22.66
	replicat bio 6	21.9033	22.0667	-0.163333	1.11987
Test 1	Δhmp_TOB 1	23.68	23.04
	Δhmp_TOB 2	23.61	22.85
	Δhmp_TOB 3	23.68	22.89
	replicat bio 1	23.6567	22.9267	0.73	0.602904			0.213333	0.862542
	Δhmp_TOB 4	23.51	22.72
	Δhmp_TOB 5	23.09	22.74
	Δhmp_TOB 6	23.15	22.65
	replicat bio 2	23.25	22.7033	0.546667	0.6846			0.19	0.876606
	Δhmp_TOB 7	23.14	22.82
	Δhmp_TOB 8	23.18	22.72
	Δhmp_TOB 9	23.12	22.92
	replicat bio 3	23.1467	22.82	0.326667	0.797377			-0.183333	1.1355
	Δhmp_TOB 10	23.22	22.72
	Δhmp_TOB 11	23.44	22.75
	Δhmp_TOB 12	23.38	22.68
	replicat bio 4	23.3467	22.7167	0.63	0.646176			0.246667	0.842842
	Δhmp_TOB 13	22.87	22.14
	Δhmp_TOB 14	22.84	22.19
	Δhmp_TOB 15	22.22	22.07
	replicat bio 5	22.6433	22.1333	0.51	0.702222			0.123333	0.918064
	Δhmp_TOB 16	22.14	22.33
	Δhmp_TOB 17	22.27	22.34
	Δhmp_TOB 18	22.26	22.16
	replicat bio 6	22.2233	22.2767	-0.0533333	1.03766			0.11	0.926588

## Sheet: sfiA_Dhmp pDIJ pTOPO TOB vs LB
		Target gene	HKG	ΔCt	2^-ΔCt	2^-ΔCt moy	SD 2^-ΔCt	ΔΔCt	Fold change
		sfiA	dxs						2^-ΔΔCt
Calibrator	Δhmp/pDIJ/pTOPO_LB 4_1	15.85	18.74
	Δhmp/pDIJ/pTOPO_LB 4_2	15.78	18.63
	Δhmp/pDIJ/pTOPO_LB 4_3	15.79
	replicat bio 1	15.8067	18.685	-2.87833	7.353
	Δhmp/pDIJ/pTOPO_LB 5_1	15.8	19.51
	Δhmp/pDIJ/pTOPO_LB 5_2	15.91	19.36
	Δhmp/pDIJ/pTOPO_LB 5_3	15.95	19.34
	replicat bio 2	15.8867	19.4033	-3.51667	11.4452
	Δhmp/pDIJ/pTOPO_LB 6_1	15.62	18.76
	Δhmp/pDIJ/pTOPO_LB 6_2	15.67	18.77
	Δhmp/pDIJ/pTOPO_LB 6_3	15.67	18.82
	replicat bio 3	15.6533	18.7833	-3.13	8.75435
	Δhmp/DIJ/pTOPO_LB 1_1	23.7	24
	Δhmp/DIJ/pTOPO_LB 1_2	23.07	23.87
	Δhmp/DIJ/pTOPO_LB 1_3	23.86	24.67
	replicat bio 1	23.5433	24.18	-0.636667	1.55473
	Δhmp/DIJ/pTOPO_LB 2_1	24	24.76
	Δhmp/DIJ/pTOPO_LB 2_2	23.65	25
	Δhmp/DIJ/pTOPO_LB 2_3	23.61	24.83
	replicat bio 2	23.7533	24.8633	-1.11	2.15846
	Δhmp/DIJ/pTOPO_LB 3_1	23.28	24.78
	Δhmp/DIJ/pTOPO_LB 3_2	23.24	24.88
	Δhmp/DIJ/pTOPO_LB 3_3	23.26	24.59
	replicat bio 3	23.26	24.75	-1.49	2.80889
Test 1	Δhmp/pDIJ/pTopo_TOB 4_1	14.47	18.82
	Δhmp/pDIJ/pTopo_TOB 4_2	14.35	18.97
	Δhmp/pDIJ/pTopo_TOB 4_3	14.77	18.98
	replicat bio 1	14.53	18.9233	-4.39333	21.0148			-1.515	2.85799
	Δhmp/pDIJ/pTOPO_TOB 5_1	14.32	18.81
	Δhmp/pDIJ/pTOPO_TOB 5_2	14.37	18.84
	Δhmp/pDIJ/pTOPO_TOB 5_3	14.31	18.84
	replicat bio 2	14.3333	18.83	-4.49667	22.5752			-0.98	1.97247
	Δhmp/pDIJ/pTOPO_TOB 6_1	14.51	18.43
	Δhmp/pDIJ/pTOPO_TOB 6_2	14.58	18.57
	Δhmp/pDIJ/pTOPO_TOB 6_3	14.57	18.62
	replicat bio 3	14.5533	18.54	-3.98667	15.8528			-0.856667	1.81085
	Δhmp/DIJ/pTOPO_TOB 1_1	22.16	24.15
	Δhmp/DIJ/pTOPO_TOB 1_2	22.31	24
	Δhmp/DIJ/pTOPO_TOB 1_3	22.55	23.92
	replicat bio 1	22.34	24.0233	-1.68333	3.21169			-1.04667	2.06575
	Δhmp/DIJ/pTOPO_TOB 2_1	22.09	24.78
	Δhmp/DIJ/pTOPO_TOB 2_2	22.13	24.34
	Δhmp/DIJ/pTOPO_TOB 2_3	22.45	24.51
	replicat bio 2	22.2233	24.5433	-2.32	4.99332			-1.21	2.31338
	Δhmp/DIJ/pTOPO_TOB 3_1	21.6	24.7
	Δhmp/DIJ/pTOPO_TOB 3_2	21.58	23.6
	Δhmp/DIJ/pTOPO_TOB 3_3	21.47	23.87
	replicat bio 3	21.55	24.0567	-2.50667	5.68305			-1.01667	2.02324

## Sheet: sfiA_dhmp pDIJ pHmp TOB vs LB
		Target gene	HKG	ΔCt	2^-ΔCt	2^-ΔCt moy	SD 2^-ΔCt	ΔΔCt	Fold change
		sfiA	dxs						2^-ΔΔCt
Calibrator	Δhmp/DIJ/pHmp_LB 1_1	23.08	24.53
	Δhmp/DIJ/pHmp_LB 1_2	23.26	23.91
	Δhmp/DIJ/pHmp_LB 1_3	23.13	23.49
	replicat bio 1	23.1567	23.9767	-0.82	1.76541
	Δhmp/DIJ/pHmp_LB 2_1	23.7	24.69
	Δhmp/DIJ/pHmp_LB 2_2	23.74	24.73
	Δhmp/DIJ/pHmp_LB 2_3	24.16	24.66
	replicat bio 2	23.8667	24.6933	-0.826667	1.77358
	Δhmp/DIJ/pHmp_LB 3_1	23.79	25.18
	Δhmp/DIJ/pHmp_LB 3_2	24.09	25.15
	Δhmp/DIJ/pHmp_LB 3_3	23.91	25.31
	replicat bio 3	23.93	25.2133	-1.28333	2.43401
	Δhmp/pDIJ/pHmp_LB 4_2	15.99	16.96
	Δhmp/pDIJ/pHmp_LB 4_3	15.79	16.7
	Δhmp/pDIJ/pHmp_LB 4_4	15.86	16.73
	replicat bio 4	15.88	16.7967	-0.916667	1.88775
	Δhmp/pDIJ/pHmp_LB 5_1	15.87	16.56
	Δhmp/pDIJ/pHmp_LB 5_2	15.85	16.71
	Δhmp/pDIJ/pHmp_LB 5_3	15.72	16.31
	replicat bio 5	15.8133	16.5267	-0.713333	1.63959
	Δhmp/pDIJ/pHmp_LB 6_1	15.87	17.14
	Δhmp/pDIJ/pHmp_LB 6_2	15.65	16.89
	Δhmp/pDIJ/pHmp_LB 6_3	15.76	16.91
	replicat bio 6	15.76	16.98	-1.22	2.32947
Test 1	Δhmp/DIJ/pHmp_TOB 1_1	23.8	24.51
	Δhmp/DIJ/pHmp_TOB 1_2	24.09	24.7
	Δhmp/DIJ/pHmp_TOB 1_3	23.6	24.5
	replicat bio 1	23.83	24.57	-0.74	1.67018			0.08	0.946058
	Δhmp/DIJ/pHmp_TOB 2_1	24.56	25.19
	Δhmp/DIJ/pHmp_TOB 2_2	24.39	25.12
	Δhmp/DIJ/pHmp_TOB 2_3	24.06	25.48
	replicat bio 2	24.3367	25.2633	-0.926667	1.90088			-0.1	1.07177
	Δhmp/DIJ/pHmp_TOB 3_1	23.14	25.37
	Δhmp/DIJ/pHmp_TOB 3_2	23.97	24.89
	Δhmp/DIJ/pHmp_TOB 3_3	24.54	25.33
	replicat bio 3	23.8833	25.1967	-1.31333	2.48515			-0.03	1.02101
	Δhmp/pDIJ/pHmp_TOB 4_1	16.47	16.65
	Δhmp/pDIJ/pHmp_TOB 4_2	15.72	16.82
	Δhmp/pDIJ/pHmp_TOB 4_3	15.66	16.68
	replicat bio 4	15.95	16.7167	-0.766667	1.70133			0.15	0.90125
	Δhmp/pDIJ/pHmp_TOB 5_1	15.95	16.69
	Δhmp/pDIJ/pHmp_TOB 5_2	15.98	16.91
	Δhmp/pDIJ/pHmp_TOB 5_3	15.72	16.63
	replicat bio 5	15.8833	16.7433	-0.86	1.81504			-0.146667	1.10701
	Δhmp/pDIJ/pHmp_TOB 6_1	15.96	16.89
	Δhmp/pDIJ/pHmp_TOB 6_2	15.92	16.88
	Δhmp/pDIJ/pHmp_TOB 6_3	15.94	16.8
	replicat bio 6	15.94	16.8567	-0.916667	1.88775			0.303333	0.810378
