# Supplementary material for: A qnr-plasmid allows aminoglycosides to induce SOS in Escherichia coli
Source: eLife. 2022 Jan 17;11:e69511. doi: 10.7554/eLife.69511 (PMC8789287; doi:10.7554/eLife.69511)
Supplement: Figure 4—source data 1. [file elife-69511-fig4-data1.xlsx]

## Sheet: WT_pDIJ_pTOPO_TOB vs LB
		Target gene	HKG	ΔCt	2^-ΔCt	2^-ΔCt moy	SD 2^-ΔCt	ΔΔCt	Fold change
		sfiA	dxs						2^-ΔΔCt
Calibrator	WT/DIJ/TOPO_LB 1	24.06	24.3
	WT/DIJ/TOPO_LB 2	23.34	24.23
	WT/DIJ/TOPO_LB 3	23.78	24.21
	replicat bio 1	23.7267	24.2467	-0.52	1.43396
	WT/DIJ/TOPO_LB 4	21.72	22.02
	WT/DIJ/TOPO_LB 5	20.6	22.27
	WT/DIJ/TOPO_LB 6	20.71	21.76
	replicat bio 2	21.01	22.0167	-1.00667	2.00926
	WT/DIJ/TOPO_LB 7	22.61	21.49
	WT/DIJ/TOPO_LB 8	22.21	21.5
	WT/DIJ/TOPO_LB 9	22.36	21.2
	replicat bio 3	22.3933	21.3967	0.996667	0.501157
	WT/DIJ/TOPO_LB 10	21.98	22.09
	WT/DIJ/TOPO_LB 11	21.9	21.76
	WT/DIJ/TOPO_LB 12	21.88	21.92
	replicat bio 4	21.92	21.9233	-0.00333333	1.00231
	WT/DIJ/TOPO_LB 13	22.25	22.38
	WT/DIJ/TOPO_LB 14	22.21	22.34
	WT/DIJ/TOPO_LB 15	22.25	22.38
	replicat bio 5	22.2367	22.3667	-0.13	1.09429
	WT/DIJ/TOPO_LB 16	21.4	21.53
	WT/DIJ/TOPO_LB 17	21.13	21.26
	WT/DIJ/TOPO_LB 18	21.17	21.28
	replicat bio 6	21.2333	21.3567	-0.123333	1.08925
Test 1	WT/DIJ/TOPO_TOB 1	21.34	23.59
	WT/DIJ/TOPO_TOB 2	21.42	23.7
	WT/DIJ/TOPO_TOB 3	22.75	23.75
	replicat bio 1	21.8367	23.68	-1.84333	3.58838			-1.32333	2.50244
	WT/DIJ/TOPO_TOB 4	21.29	23.89
	WT/DIJ/TOPO_TOB 5	21.22	23.68
	WT/DIJ/TOPO_TOB 6	21.28	23.78
	replicat bio 2	21.2633	23.7833	-2.52	5.73582			-1.51333	2.85469
	WT/DIJ/TOPO_TOB 7	21.05	22.48
	WT/DIJ/TOPO_TOB 8	21.12	22.48
	WT/DIJ/TOPO_TOB 9	21.08	22.41
	replicat bio 3	21.0833	22.4567	-1.37333	2.59068			-2.37	5.16941
	WT/DIJ/TOPO_TOB 10	20.45	22.08
	WT/DIJ/TOPO_TOB 11	20.39	22.05
	WT/DIJ/TOPO_TOB 12	20.45	21.99
	replicat bio 4	20.43	22.04	-1.61	3.05252			-1.60667	3.04547
	WT/DIJ/TOPO_TOB 13	20.66	22.49
	WT/DIJ/TOPO_TOB 14	20.59	22.42
	WT/DIJ/TOPO_TOB 15	20.55	22.38
	replicat bio 5	20.6	22.43	-1.83	3.55537			-1.7	3.24901
	WT/DIJ/TOPO_TOB 16	20.28	22.24
	WT/DIJ/TOPO_TOB 17	20.34	22.02
	WT/DIJ/TOPO_TOB 18	20.25	22.08
	replicat bio 6	20.29	22.1133	-1.82333	3.53898			-1.7	3.24901

## Sheet: WT_pDIJ_pMutT_TOB vs LB
		Target gene	HKG	ΔCt	2^-ΔCt	2^-ΔCt moy	SD 2^-ΔCt	ΔΔCt	Fold change
		sfiA	dxs						2^-ΔΔCt
Calibrator	WT/DIJ/pMutT_LB 1	21.02	24.01
	WT/DIJ/pMutT_LB 2	20.3	23.71
	WT/DIJ/pMutT_LB 3	20.05	23.75
	replicat bio 1	20.4567	23.8233	-3.36667	10.315
	WT/DIJ/pMutT_LB 4	19.31	21.18
	WT/DIJ/pMutT_LB 5	19.58	21.16
	WT/DIJ/pMutT_LB 6	18.83	21.01
	replicat bio 2	19.24	21.1167	-1.87667	3.67226
	WT/DIJ/pMutT_LB 7	17.19	21.14
	WT/DIJ/pMutT_LB 8	17.29	21.02
	WT/DIJ/pMutT_LB 9	18.81	20.91
	replicat bio 3	17.7633	21.0233	-3.26	9.57983
	WT/DIJ/pMutT_LB 10	18.78	19.59
	WT/DIJ/pMutT_LB 11	18.78	19.68
	WT/DIJ/pMutT_LB 12	18.75	20.02
	replicat bio 4	18.77	19.7633	-0.993333	1.99078
	WT/DIJ/pMutT_LB 13	19.04	21.41
	WT/DIJ/pMutT_LB 14	19.12	21.49
	WT/DIJ/pMutT_LB 15	19.14	21.51
	replicat bio 5	19.1	21.47	-2.37	5.16941
	WT/DIJ/pMutT_LB 16	19.22	21.61
	WT/DIJ/pMutT_LB 17	19.24	21.63
	WT/DIJ/pMutT_LB 18	19.35	21.74
	replicat bio 6	19.27	21.66	-2.39	5.24157
Test 1	WT/DIJ/pMutT_TOB 1	20.74	23.7
	WT/DIJ/pMutT_TOB 2	20.84	23.71
	WT/DIJ/pMutT_TOB 3	20.67	23.65
	replicat bio 1	20.75	23.6867	-2.93667	7.6564			0.43	0.742262
	WT/DIJ/pMutT_TOB 4	19.14	19.67
	WT/DIJ/pMutT_TOB 5	19.22	19.7
	WT/DIJ/pMutT_TOB 6	19.28	19.62
	replicat bio 2	19.2133	19.6633	-0.45	1.36604			1.42667	0.371989
	WT/DIJ/pMutT_TOB 7	18.69	20.79
	WT/DIJ/pMutT_TOB 8	18.28	20.08
	WT/DIJ/pMutT_TOB 9	18.73	20.33
	replicat bio 3	18.5667	20.4	-1.83333	3.56359			1.42667	0.371989
	WT/DIJ/pMutT_TOB10	18.93	20.02
	WT/DIJ/pMutT_TOB11	18.84	20.12
	WT/DIJ/pMutT_TOB12	18.88	20.14
	replicat bio 4	18.8833	20.0933	-1.21	2.31338			-0.216667	1.16205
	WT/DIJ/pMutT_TOB13	19.26	20.87
	WT/DIJ/pMutT_TOB14	19.51	21.12
	WT/DIJ/pMutT_TOB15	18.98	20.56
	replicat bio 5	19.25	20.85	-1.6	3.03143			0.77	0.586417
	WT/DIJ/pMutT_TOB16	19.96	21.22
	WT/DIJ/pMutT_TOB17	19.98	21.18
	WT/DIJ/pMutT_TOB18	18.74	21.16
	replicat bio 6	19.56	21.1867	-1.62667	3.08799			0.763333	0.589134
