# Supplementary material for: A qnr-plasmid allows aminoglycosides to induce SOS in Escherichia coli
Source: eLife. 2022 Jan 17;11:e69511. doi: 10.7554/eLife.69511 (PMC8789287; doi:10.7554/eLife.69511)
Supplement: Figure 4—source data 2. [file elife-69511-fig4-data2.xlsx]

## Sheet: Feuille 1 - Figure 4-source dat
Figure 4-source data B
	pG644 (SOS GFP)	pG644 (SOS GFP)	pG644 (SOS GFP)	pG644 (SOS GFP)	pG644 (SOS-GFP) + pDIJ09-518a	pG644 (SOS-GFP) + pDIJ09-518a	pG644 (SOS-GFP) + pDIJ09-518a	pG644 (SOS-GFP) + pDIJ09-518a
E. coliΔrecF	0.863555	1.03467	0.674312	0.771605	1.30985	1.38051	1.27778	1.30993
E. coli ΔrecB	0.453992	0.63663	0.415945	0.380759	0.878049	1.02871	1.00428	1.00176
