# Supplementary material for: A qnr-plasmid allows aminoglycosides to induce SOS in Escherichia coli
Source: eLife. 2022 Jan 17;11:e69511. doi: 10.7554/eLife.69511 (PMC8789287; doi:10.7554/eLife.69511)
Supplement: Figure 4—source data 3. [file elife-69511-fig4-data3.xlsx]

## Sheet: CFU
			#1				#2
			LB (-6)	TOB (-6)	TOB/LB	%	LB (-6)	TOB (-6)	TOB/LB	%
		MG1655	60	80	1.33333	133.333	80	75	0.9375	93.75
	i037	recF	70	70	1	100	55	60	1.09091	109.091
	H546	recB	70	68	0.971429	97.1429	45	48	1.06667	106.667
		wt pDIJ	95	90	0.947368	94.7368	70	50	0.714286	71.4286
		recF pDIJ	50	56	1.12	112	60	50	0.833333	83.3333
		recB pDIJ	85	40	0.470588	47.0588	150	60	0.4	40

## Sheet: Magellan Sheet 1
	WT	recF	recB	WT pDIJ	recF pDIJ	recB pDIJ	WT	recF	recB	WT pDIJ	recF pDIJ	recB pDIJ	WT	recF	recB	WT pDIJ	recF pDIJ	recB pDIJ	WT	recF	recB	WT pDIJ	recF pDIJ	recB pDIJ	WT	recF	recB	WT pDIJ	recF pDIJ	recB pDIJ	WT	recF	recB	WT pDIJ	recF pDIJ	recB pDIJ	WT TOB	recF TOB	recB TOB	WT pDIJ TOB	recF pDIJ TOB	recB pDIJ TOB	WT TOB	recF TOB	recB TOB	WT pDIJ TOB	recF pDIJ TOB	recB pDIJ TOB	WT TOB
0s	0.0881	0.0882	0.0878	0.0884	0.088	0.0883	0.0873	0.0883	0.0878	0.0877	0.087	0.0903	0.0882	0.0879	0.0882	0.0882	0.0898	0.0883	0.0887	0.0866	0.0881	0.0881	0.0911	0.0943	0.0875	0.0893	0.0885	0.09	0.0881	0.087	0.0867	0.0885	0.0902	0.088	0.09	0.0949	0.087	0.0892	0.0892	0.089	0.0871	0.0865	0.0878	0.0891	0.0892	0.0903	0.0893	0.0953	0.0876
600s	0.0886	0.0885	0.0881	0.0884	0.0884	0.0907	0.0882	0.0893	0.0883	0.089	0.0873	0.0907	0.0889	0.088	0.0886	0.0883	0.0897	0.0892	0.0893	0.0871	0.0888	0.0883	0.0912	0.0942	0.088	0.089	0.0888	0.09	0.0887	0.0881	0.0882	0.0901	0.091	0.0881	0.0907	0.0948	0.088	0.0893	0.0892	0.0893	0.0876	0.0866	0.0882	0.0894	0.0899	0.091	0.0895	0.0954	0.0879
1200s	0.0887	0.0885	0.0881	0.0885	0.0887	0.0913	0.0879	0.0892	0.0885	0.0896	0.0875	0.091	0.089	0.0881	0.0888	0.0886	0.0898	0.0892	0.0894	0.0871	0.0887	0.0887	0.0908	0.0941	0.0881	0.089	0.0888	0.0903	0.0889	0.0883	0.0883	0.0904	0.0913	0.0882	0.0907	0.0945	0.0882	0.0893	0.0892	0.0894	0.0877	0.087	0.0883	0.0896	0.09	0.0911	0.0895	0.0954	0.088
1800s	0.0889	0.0888	0.0884	0.0887	0.089	0.0914	0.088	0.0893	0.0887	0.0901	0.0874	0.0913	0.0891	0.0883	0.0888	0.0886	0.0901	0.0893	0.0894	0.0872	0.0889	0.0892	0.0908	0.094	0.0883	0.0891	0.089	0.0906	0.0895	0.0884	0.0884	0.0906	0.0914	0.0884	0.0908	0.0948	0.0883	0.0895	0.0894	0.0896	0.0879	0.0871	0.0882	0.0897	0.0901	0.0914	0.0896	0.0961	0.0882
2400s	0.0892	0.0891	0.0887	0.0889	0.0889	0.0898	0.0882	0.0895	0.0891	0.0905	0.0874	0.0915	0.0895	0.0886	0.0891	0.089	0.0904	0.0894	0.0897	0.0873	0.0892	0.0897	0.0911	0.0939	0.0887	0.0895	0.0894	0.0911	0.0895	0.0888	0.0888	0.0911	0.0919	0.089	0.091	0.0947	0.0888	0.0898	0.0896	0.0901	0.088	0.0874	0.0885	0.0898	0.0905	0.0922	0.09	0.0962	0.0883
3000s	0.0898	0.0898	0.0888	0.0892	0.089	0.0887	0.0888	0.09	0.0899	0.0913	0.0877	0.0923	0.0899	0.0891	0.0895	0.0897	0.0906	0.0898	0.0902	0.0875	0.0898	0.0907	0.0913	0.0947	0.0894	0.0902	0.09	0.0916	0.0897	0.0891	0.0895	0.0917	0.0924	0.0897	0.0914	0.0951	0.0893	0.0903	0.0899	0.0907	0.0883	0.088	0.0891	0.0904	0.0909	0.0927	0.0903	0.0968	0.0889
3600s	0.0906	0.0906	0.0895	0.09	0.0893	0.089	0.0897	0.0909	0.0908	0.0922	0.0882	0.0931	0.0907	0.0898	0.0902	0.0905	0.0911	0.0909	0.0909	0.0878	0.0906	0.0918	0.0916	0.0952	0.0902	0.091	0.0908	0.0923	0.0899	0.0896	0.0903	0.0925	0.0931	0.0906	0.0919	0.096	0.09	0.0909	0.0905	0.0916	0.0888	0.0885	0.0901	0.0911	0.0918	0.094	0.0907	0.0978	0.0895
4200s	0.0917	0.0919	0.0907	0.0913	0.0898	0.0897	0.0909	0.092	0.0921	0.0936	0.0888	0.0939	0.0918	0.0909	0.0911	0.0918	0.0915	0.0914	0.0921	0.0883	0.0918	0.0937	0.0924	0.096	0.0914	0.0923	0.0919	0.0936	0.0905	0.0902	0.0915	0.0937	0.0941	0.0922	0.0927	0.0971	0.0909	0.0919	0.0914	0.0927	0.0893	0.0893	0.0912	0.092	0.0928	0.0957	0.0916	0.0985	0.0904
4800s	0.0934	0.0936	0.0923	0.0931	0.0906	0.0906	0.0928	0.0936	0.0938	0.0957	0.0898	0.0954	0.0935	0.0925	0.0924	0.0938	0.0923	0.0922	0.0936	0.0888	0.0934	0.0958	0.0932	0.0972	0.0932	0.0942	0.0937	0.0955	0.0912	0.0911	0.0933	0.0953	0.0955	0.0943	0.0935	0.0987	0.0925	0.0934	0.0925	0.0945	0.09	0.0902	0.0928	0.0933	0.0942	0.0976	0.0922	0.1	0.0918
5400s	0.0957	0.096	0.0944	0.0958	0.0915	0.0919	0.0953	0.096	0.0958	0.099	0.0912	0.0973	0.0958	0.0945	0.0943	0.0965	0.0932	0.0935	0.0959	0.0895	0.0954	0.0994	0.0944	0.0993	0.0955	0.0968	0.0958	0.0985	0.0924	0.0925	0.0956	0.0973	0.0973	0.0978	0.0949	0.1005	0.0943	0.0954	0.0942	0.0972	0.091	0.0915	0.0951	0.0952	0.0961	0.1012	0.0936	0.1019	0.0936
6000s	0.0987	0.0992	0.0972	0.0992	0.0928	0.0935	0.0986	0.099	0.0988	0.1035	0.0929	0.1	0.0989	0.0974	0.0967	0.0999	0.0943	0.095	0.0988	0.0904	0.0982	0.1038	0.096	0.1019	0.0987	0.1002	0.0986	0.1022	0.0935	0.0941	0.0984	0.0998	0.0994	0.1021	0.0965	0.1029	0.0971	0.0982	0.0965	0.1007	0.0923	0.0931	0.0982	0.0976	0.0985	0.1052	0.0951	0.1044	0.0961
6600s	0.1028	0.1035	0.101	0.1043	0.0945	0.0958	0.1032	0.1031	0.1025	0.1103	0.0953	0.1031	0.1031	0.1012	0.1001	0.1052	0.0962	0.0972	0.1027	0.0917	0.1019	0.1103	0.0982	0.1052	0.1029	0.1048	0.1025	0.1077	0.0955	0.0965	0.1024	0.1032	0.1023	0.1082	0.0987	0.106	0.1007	0.1017	0.0994	0.1055	0.094	0.0954	0.1023	0.1008	0.1017	0.1109	0.0973	0.1073	0.0993
7200s	0.108	0.109	0.1059	0.1107	0.0966	0.0988	0.1091	0.1085	0.1073	0.1179	0.0982	0.1072	0.1086	0.1062	0.1043	0.1117	0.0984	0.1	0.1077	0.0934	0.1066	0.1176	0.1008	0.1092	0.1084	0.1109	0.1073	0.1148	0.0979	0.0996	0.1078	0.108	0.1064	0.1171	0.1019	0.1112	0.1054	0.1067	0.1031	0.1117	0.0963	0.0985	0.1073	0.105	0.1059	0.1186	0.1002	0.1112	0.1034
7800s	0.1154	0.1165	0.1125	0.1197	0.1001	0.1031	0.117	0.1162	0.1142	0.1299	0.1027	0.1131	0.1158	0.1128	0.1097	0.1206	0.1016	0.1041	0.1145	0.0958	0.1129	0.1288	0.105	0.1153	0.1158	0.1184	0.1136	0.1246	0.1015	0.1039	0.1146	0.1142	0.1117	0.1279	0.1062	0.1167	0.1114	0.1129	0.108	0.1205	0.0998	0.1027	0.1146	0.1108	0.1118	0.129	0.1044	0.1169	0.1091
8400s	0.1237	0.124	0.1201	0.1269	0.1043	0.1086	0.1241	0.124	0.1221	0.1406	0.108	0.1197	0.1239	0.1209	0.1167	0.1282	0.1057	0.1092	0.1228	0.099	0.1209	0.1396	0.1101	0.1216	0.1241	0.126	0.1217	0.133	0.1059	0.1093	0.1228	0.1221	0.1184	0.1392	0.1116	0.1243	0.1197	0.1209	0.1147	0.1278	0.1042	0.1081	0.1226	0.1184	0.119	0.1387	0.1098	0.1234	0.1166
9000s	0.1304	0.1306	0.1265	0.1358	0.1103	0.1156	0.1318	0.1307	0.1293	0.1538	0.1156	0.1283	0.1309	0.1277	0.1249	0.1371	0.1117	0.1166	0.1301	0.1036	0.1287	0.1527	0.1173	0.1308	0.1307	0.133	0.1286	0.1431	0.1124	0.1167	0.1296	0.1298	0.1268	0.1519	0.1188	0.134	0.1263	0.1273	0.1223	0.1356	0.1101	0.1151	0.1293	0.126	0.1266	0.1505	0.1166	0.1316	0.1238
9600s	0.1404	0.1404	0.135	0.1471	0.1173	0.1226	0.1434	0.1405	0.1375	0.1704	0.123	0.1351	0.1414	0.1358	0.1313	0.1485	0.1188	0.1243	0.1399	0.1096	0.1362	0.1692	0.126	0.1398	0.1413	0.1434	0.1366	0.1555	0.1197	0.1244	0.1397	0.1367	0.1334	0.1675	0.127	0.1425	0.1342	0.135	0.1286	0.1464	0.1173	0.1226	0.1393	0.1324	0.1331	0.1658	0.1247	0.1397	0.1309
10200s	0.1518	0.1516	0.146	0.1593	0.1244	0.129	0.1556	0.1518	0.1488	0.1884	0.1295	0.143	0.153	0.1476	0.1418	0.1606	0.1263	0.1315	0.1519	0.1175	0.1477	0.1868	0.1333	0.1474	0.1528	0.155	0.148	0.1707	0.1275	0.1317	0.1516	0.1481	0.143	0.1863	0.1354	0.1532	0.1457	0.146	0.1374	0.1581	0.1245	0.1289	0.1506	0.1429	0.1435	0.1829	0.1319	0.1466	0.1418
10800s	0.1658	0.1653	0.1578	0.1745	0.131	0.1374	0.1711	0.1651	0.1603	0.2101	0.138	0.1537	0.167	0.1595	0.1526	0.1756	0.133	0.139	0.1658	0.1246	0.1586	0.2077	0.1408	0.1584	0.1668	0.1689	0.1593	0.1871	0.1343	0.1392	0.1657	0.1592	0.1539	0.2049	0.1434	0.1634	0.1573	0.1573	0.1482	0.1722	0.1312	0.1366	0.1646	0.1539	0.1541	0.2023	0.1395	0.1559	0.1531
11400s	0.1838	0.1825	0.173	0.1948	0.1413	0.1489	0.1909	0.1822	0.1755	0.2395	0.15	0.1671	0.1853	0.1748	0.1659	0.1951	0.1427	0.1501	0.184	0.1327	0.1736	0.2343	0.1524	0.1731	0.1849	0.1865	0.1742	0.2104	0.1449	0.1508	0.1837	0.1738	0.1664	0.2318	0.1553	0.1807	0.1727	0.1719	0.1603	0.1914	0.1411	0.1478	0.1827	0.1679	0.168	0.2286	0.1504	0.1684	0.1671
12000s	0.205	0.2022	0.1911	0.2149	0.1536	0.1614	0.2122	0.2018	0.1941	0.2681	0.1637	0.1808	0.2073	0.1935	0.1825	0.2159	0.1558	0.1636	0.206	0.1445	0.1921	0.2633	0.1669	0.1912	0.2068	0.2073	0.1922	0.2334	0.1581	0.164	0.2057	0.1917	0.1822	0.259	0.1696	0.197	0.1919	0.1895	0.1755	0.2109	0.1536	0.1599	0.2046	0.1851	0.1849	0.254	0.1643	0.1817	0.1851
12600s	0.2275	0.2235	0.2112	0.2405	0.1669	0.1764	0.2355	0.224	0.2153	0.3041	0.1796	0.1997	0.2291	0.2145	0.2024	0.2404	0.1693	0.1779	0.2288	0.1566	0.2131	0.297	0.1831	0.2116	0.229	0.2287	0.213	0.2627	0.1723	0.1786	0.229	0.213	0.2018	0.291	0.1867	0.216	0.2144	0.2106	0.1939	0.2348	0.1671	0.1742	0.2271	0.206	0.2055	0.2847	0.1795	0.1976	0.2063
13200s	0.2517	0.2468	0.2328	0.2682	0.1843	0.1951	0.2614	0.2466	0.2382	0.3424	0.2005	0.2214	0.2537	0.237	0.223	0.2685	0.187	0.1968	0.251	0.172	0.2352	0.3321	0.2047	0.237	0.2538	0.2527	0.2344	0.2956	0.1904	0.1979	0.2522	0.2358	0.2238	0.3264	0.2091	0.2402	0.2364	0.2316	0.2139	0.2613	0.1844	0.1919	0.2508	0.228	0.2271	0.3181	0.1986	0.218	0.2287
13800s	0.282	0.2751	0.257	0.2975	0.2047	0.2166	0.2913	0.2738	0.2615	0.3823	0.2239	0.2482	0.2843	0.2622	0.2454	0.2968	0.2079	0.2187	0.2812	0.1912	0.2572	0.368	0.2304	0.2646	0.284	0.2818	0.2584	0.3321	0.213	0.2215	0.2832	0.2589	0.2469	0.3631	0.2361	0.2673	0.2617	0.2552	0.2352	0.2884	0.2041	0.2122	0.2818	0.2502	0.2488	0.3544	0.2215	0.2439	0.2532
14400s	0.3088	0.3001	0.2871	0.3314	0.2291	0.2422	0.3107	0.3004	0.2938	0.4226	0.2504	0.2792	0.3113	0.2921	0.2717	0.3239	0.2317	0.2435	0.3054	0.2125	0.2896	0.4049	0.264	0.2986	0.3104	0.3066	0.2875	0.3654	0.2373	0.2475	0.3072	0.2904	0.2701	0.4009	0.2658	0.2983	0.2924	0.2845	0.2595	0.3181	0.2285	0.2376	0.3035	0.2801	0.2775	0.3888	0.2505	0.2749	0.2824
15000s	0.3347	0.3297	0.3119	0.3585	0.2568	0.2698	0.3314	0.3231	0.3138	0.4609	0.2778	0.3074	0.3331	0.3145	0.2988	0.3527	0.2596	0.2708	0.3305	0.2347	0.3112	0.4383	0.2983	0.3308	0.3391	0.3348	0.3112	0.3964	0.2664	0.2792	0.3285	0.3117	0.3028	0.4343	0.298	0.3293	0.3179	0.3096	0.2897	0.3483	0.2561	0.2663	0.327	0.3043	0.3029	0.4213	0.2825	0.3066	0.3081
15600s	0.3519	0.3455	0.335	0.3728	0.2811	0.2924	0.3519	0.3421	0.3382	0.487	0.2987	0.3313	0.3494	0.3344	0.3246	0.3675	0.2833	0.2971	0.3458	0.2578	0.3376	0.4636	0.329	0.3646	0.3543	0.3522	0.3387	0.4187	0.2919	0.3097	0.3431	0.3344	0.3214	0.4622	0.3287	0.3614	0.3419	0.335	0.3124	0.3691	0.28	0.2896	0.3411	0.3281	0.3273	0.4432	0.3103	0.3344	0.3357
16200s	0.3788	0.3777	0.3574	0.3933	0.3044	0.3128	0.3733	0.3634	0.3547	0.5162	0.3192	0.3591	0.3771	0.3599	0.3445	0.3887	0.3065	0.3143	0.365	0.2895	0.3538	0.4848	0.3542	0.3878	0.3822	0.3812	0.3559	0.4438	0.3149	0.3295	0.3681	0.35	0.3444	0.4866	0.3536	0.3841	0.3598	0.3522	0.3395	0.3876	0.3032	0.3083	0.3688	0.3458	0.3457	0.4671	0.3351	0.3561	0.354
16800s	0.3985	0.4012	0.3845	0.428	0.3272	0.3369	0.3904	0.3812	0.3748	0.5558	0.3438	0.3837	0.3979	0.3838	0.3674	0.4222	0.3293	0.3391	0.3867	0.3131	0.3785	0.5185	0.38	0.416	0.4108	0.409	0.3825	0.4832	0.3382	0.3569	0.4005	0.3784	0.3685	0.5283	0.3809	0.4107	0.3897	0.3775	0.3551	0.4213	0.3245	0.3331	0.3928	0.3687	0.3685	0.5025	0.362	0.384	0.379
17400s	0.4165	0.4225	0.4095	0.4562	0.3534	0.355	0.4137	0.4038	0.4003	0.5873	0.3702	0.411	0.4184	0.4084	0.3936	0.4483	0.3552	0.3568	0.4094	0.3412	0.4019	0.5508	0.4051	0.4392	0.4336	0.433	0.4106	0.5146	0.3635	0.3754	0.4271	0.4051	0.398	0.5618	0.4079	0.432	0.417	0.4044	0.3837	0.4477	0.3498	0.3514	0.4146	0.3943	0.3956	0.5328	0.3857	0.4031	0.4083
18000s	0.4322	0.4404	0.4296	0.4876	0.3782	0.3819	0.4324	0.4273	0.4291	0.6244	0.3909	0.4379	0.4356	0.426	0.4162	0.4784	0.3787	0.3784	0.4294	0.3544	0.4315	0.5832	0.4308	0.4664	0.4498	0.4517	0.4332	0.5488	0.3882	0.4008	0.4608	0.4321	0.4278	0.5984	0.4325	0.4614	0.4408	0.4294	0.411	0.4771	0.3755	0.3783	0.4373	0.4173	0.4207	0.5664	0.4072	0.4331	0.4363
18600s	0.4462	0.4567	0.4494	0.517	0.3986	0.4091	0.4453	0.4453	0.4572	0.656	0.4153	0.468	0.4503	0.443	0.437	0.5084	0.3985	0.4033	0.4439	0.3728	0.4572	0.6144	0.4494	0.4956	0.4652	0.4712	0.4578	0.5809	0.4094	0.4274	0.4868	0.4598	0.457	0.6309	0.4518	0.4919	0.4599	0.454	0.4385	0.5087	0.3955	0.4062	0.4563	0.4397	0.4462	0.5975	0.4232	0.4592	0.4596
19200s	0.4579	0.4714	0.4676	0.552	0.4229	0.4354	0.4555	0.4605	0.4801	0.6853	0.4393	0.4998	0.465	0.4586	0.4575	0.547	0.4222	0.4321	0.4604	0.3979	0.4818	0.6453	0.4734	0.5236	0.4804	0.4904	0.4818	0.6144	0.434	0.4531	0.5098	0.4906	0.4912	0.6635	0.4733	0.5173	0.4788	0.4745	0.4632	0.5485	0.4203	0.4351	0.4734	0.4648	0.4758	0.6312	0.4464	0.4877	0.4788
19800s	0.4697	0.4867	0.4857	0.5766	0.4456	0.4608	0.4624	0.4724	0.4942	0.7107	0.4607	0.5272	0.4767	0.4735	0.4746	0.5708	0.4444	0.4511	0.4655	0.4176	0.4958	0.6733	0.4909	0.5459	0.4923	0.5057	0.5006	0.6373	0.4567	0.473	0.52	0.5068	0.5141	0.6906	0.4896	0.5398	0.4926	0.4925	0.4842	0.573	0.4423	0.4602	0.4804	0.4782	0.4927	0.6527	0.4621	0.5065	0.4956
20400s	0.4819	0.5044	0.5064	0.6149	0.4692	0.4896	0.4806	0.4912	0.5175	0.7511	0.4848	0.5572	0.4881	0.4879	0.4938	0.6151	0.4669	0.4824	0.4918	0.4429	0.5191	0.7048	0.5167	0.5809	0.5085	0.5263	0.5238	0.6778	0.4803	0.4997	0.5506	0.5338	0.5451	0.7328	0.5118	0.5702	0.5085	0.5099	0.5055	0.6202	0.4669	0.4908	0.498	0.4992	0.5166	0.6957	0.4841	0.5392	0.5108
21000s	0.4944	0.5199	0.5242	0.6427	0.4902	0.5156	0.4937	0.5055	0.5342	0.7803	0.507	0.5858	0.4993	0.5014	0.51	0.6467	0.4883	0.5083	0.5051	0.4579	0.5355	0.7348	0.5333	0.6059	0.5194	0.542	0.5424	0.7054	0.5019	0.5259	0.5607	0.5463	0.5621	0.7639	0.5298	0.5954	0.5236	0.53	0.5275	0.6532	0.4888	0.5191	0.5101	0.5143	0.5341	0.725	0.503	0.5637	0.5269
21600s	0.5117	0.5378	0.5434	0.6714	0.5102	0.5421	0.5086	0.5226	0.5527	0.8077	0.5268	0.6133	0.5138	0.5151	0.5263	0.6768	0.509	0.5366	0.5169	0.4722	0.5546	0.7627	0.5533	0.6383	0.5335	0.5596	0.5626	0.7395	0.5233	0.5542	0.581	0.5681	0.5832	0.7994	0.5484	0.6216	0.5382	0.5475	0.5485	0.6865	0.5111	0.5488	0.5245	0.5327	0.5546	0.7589	0.5233	0.5927	0.5433
22200s	0.5416	0.5632	0.5644	0.6997	0.5291	0.5686	0.5365	0.5463	0.5667	0.8335	0.5441	0.6388	0.5365	0.5378	0.5469	0.7019	0.5286	0.5618	0.5132	0.4863	0.5725	0.7887	0.5721	0.6661	0.5506	0.5823	0.5842	0.7662	0.544	0.5828	0.5692	0.5848	0.6008	0.8276	0.5674	0.6468	0.5556	0.5659	0.5703	0.7156	0.5314	0.5785	0.5457	0.553	0.5765	0.7873	0.5437	0.6191	0.559
22800s	0.5673	0.5961	0.5986	0.7365	0.5472	0.5956	0.5493	0.5723	0.6028	0.8595	0.563	0.6658	0.5713	0.5611	0.5645	0.7343	0.5468	0.5897	0.5196	0.5019	0.599	0.8145	0.5906	0.6974	0.5888	0.617	0.6055	0.8063	0.5636	0.6119	0.5626	0.6184	0.6151	0.8627	0.5858	0.672	0.5781	0.5906	0.5931	0.7545	0.5505	0.6072	0.5629	0.5731	0.6011	0.8216	0.5627	0.6437	0.5789
23400s	0.5838	0.6171	0.625	0.768	0.5649	0.6225	0.5558	0.5868	0.6178	0.8928	0.5801	0.6913	0.5897	0.5876	0.6069	0.77	0.5643	0.6159	0.5163	0.5196	0.624	0.8433	0.6091	0.7243	0.6086	0.6361	0.6433	0.8356	0.5825	0.6405	0.5546	0.6156	0.6589	0.8986	0.6038	0.6988	0.6122	0.6234	0.6209	0.786	0.5692	0.6359	0.5644	0.5899	0.6276	0.8545	0.581	0.6712	0.6092
24000s	0.5925	0.6343	0.6456	0.787	0.5806	0.6461	0.5515	0.5963	0.6347	0.9177	0.5946	0.714	0.5992	0.6031	0.6225	0.7857	0.5807	0.6374	0.5152	0.5243	0.634	0.8751	0.6247	0.7498	0.6206	0.655	0.6636	0.8544	0.5998	0.667	0.5451	0.617	0.6632	0.9222	0.62	0.722	0.6312	0.6454	0.6558	0.8027	0.5864	0.6618	0.5631	0.6031	0.6456	0.8758	0.5981	0.6938	0.6342
24600s	0.6003	0.6482	0.6595	0.8062	0.596	0.6699	0.5715	0.6121	0.6484	0.9311	0.6101	0.7382	0.6061	0.6205	0.6422	0.8014	0.5963	0.6583	0.5184	0.5522	0.6493	0.8981	0.6356	0.7707	0.6284	0.6648	0.6772	0.8715	0.6165	0.6928	0.5468	0.6232	0.682	0.9399	0.6366	0.7447	0.6413	0.657	0.6719	0.8204	0.6029	0.6873	0.571	0.6138	0.6606	0.8888	0.6135	0.7172	0.6487
25200s	0.6088	0.6588	0.6686	0.8269	0.6112	0.6948	0.5861	0.6248	0.662	0.952	0.6241	0.7599	0.6151	0.6308	0.6536	0.8252	0.6113	0.6862	0.5264	0.5581	0.6611	0.9203	0.6529	0.7953	0.6358	0.6725	0.6872	0.8969	0.6321	0.7229	0.5537	0.6353	0.7034	0.9662	0.653	0.7692	0.6499	0.6671	0.682	0.8449	0.6187	0.715	0.5774	0.6259	0.6722	0.914	0.6303	0.742	0.6586
25800s	0.6156	0.6677	0.6791	0.8441	0.6245	0.7183	0.5929	0.6349	0.6732	0.965	0.6383	0.7828	0.6223	0.6391	0.6621	0.84	0.6246	0.7132	0.5317	0.5645	0.6708	0.9396	0.6639	0.8147	0.6424	0.6812	0.6967	0.9113	0.6477	0.7493	0.5569	0.6475	0.7175	0.9794	0.6677	0.7947	0.6582	0.6729	0.6908	0.8608	0.6332	0.7376	0.5864	0.6362	0.6827	0.9244	0.6454	0.7679	0.6675
26400s	0.6221	0.6723	0.6867	0.861	0.6359	0.7322	0.6091	0.6425	0.6836	0.9879	0.6486	0.7944	0.629	0.6456	0.6695	0.8558	0.638	0.7371	0.5364	0.5782	0.6843	0.9581	0.6806	0.8465	0.6489	0.687	0.7052	0.9304	0.6613	0.7685	0.5623	0.656	0.7351	1.0028	0.6832	0.816	0.6686	0.6809	0.7005	0.8779	0.6474	0.7555	0.5941	0.6473	0.6942	0.9473	0.6605	0.7893	0.6782
27000s	0.6287	0.6815	0.6958	0.8789	0.6491	0.7467	0.6252	0.6527	0.694	0.9989	0.6603	0.8093	0.6347	0.6523	0.6772	0.8715	0.6499	0.7537	0.5431	0.5956	0.6966	0.9734	0.6919	0.8683	0.6569	0.6949	0.7163	0.9494	0.6756	0.7872	0.5685	0.6696	0.7535	1.0178	0.6961	0.8278	0.6762	0.6885	0.7125	0.8963	0.6602	0.7734	0.6002	0.6631	0.7058	0.9605	0.6738	0.8032	0.6859
27600s	0.6346	0.6885	0.7041	0.8929	0.6594	0.758	0.626	0.6596	0.7021	1.0146	0.6694	0.8209	0.6406	0.6582	0.6845	0.8822	0.6618	0.7668	0.5484	0.6032	0.7095	0.9899	0.7038	0.8841	0.6626	0.7011	0.7257	0.9655	0.688	0.8032	0.5742	0.6782	0.7714	1.0341	0.7091	0.8409	0.6861	0.6976	0.7238	0.9083	0.6723	0.7867	0.6066	0.6723	0.7152	0.9822	0.6861	0.8164	0.6959
28200s	0.64	0.6967	0.7138	0.9035	0.6698	0.7698	0.6383	0.6676	0.7101	1.0216	0.6799	0.8371	0.6456	0.6643	0.6906	0.8913	0.6712	0.7766	0.5537	0.6076	0.7166	1.0028	0.7126	0.8987	0.669	0.7064	0.7353	0.9774	0.6996	0.8157	0.5793	0.6827	0.7841	1.0452	0.7209	0.85	0.694	0.7043	0.732	0.919	0.6836	0.7981	0.6104	0.677	0.7241	0.9947	0.6966	0.8265	0.7027
28800s	0.6434	0.6986	0.7181	0.9142	0.6785	0.779	0.6554	0.6743	0.7184	1.036	0.6882	0.8461	0.6492	0.6694	0.6976	0.9066	0.681	0.7896	0.5614	0.6168	0.731	1.0177	0.7256	0.9142	0.6734	0.7103	0.7456	0.9941	0.7101	0.832	0.5863	0.6957	0.7992	1.0582	0.7333	0.8614	0.7018	0.7125	0.7435	0.9333	0.6938	0.812	0.6156	0.6876	0.7368	1.0056	0.7091	0.8381	0.7115
29400s	0.6477	0.7074	0.7271	0.9295	0.6884	0.7895	0.6686	0.6825	0.7269	1.0494	0.6963	0.8547	0.6526	0.674	0.7036	0.922	0.6902	0.8031	0.5664	0.6245	0.7433	1.0307	0.7393	0.9271	0.677	0.7151	0.7568	1.0072	0.7207	0.8468	0.5913	0.7044	0.812	1.0729	0.7456	0.8727	0.7077	0.7183	0.7522	0.9504	0.7032	0.8248	0.6202	0.6933	0.7491	1.0193	0.7208	0.8477	0.7195
30000s	0.6504	0.7098	0.7309	0.9406	0.6948	0.7969	0.6736	0.6882	0.7327	1.0599	0.7026	0.8632	0.6558	0.6776	0.7085	0.933	0.6989	0.8117	0.5694	0.6271	0.7517	1.0401	0.7485	0.9419	0.6814	0.7211	0.7672	1.0219	0.7316	0.8584	0.5935	0.708	0.8253	1.0853	0.7546	0.88	0.7139	0.7241	0.7598	0.9663	0.7127	0.8365	0.6247	0.6977	0.7624	1.0314	0.7304	0.8577	0.7266
30600s	0.6549	0.7177	0.7383	0.95	0.7028	0.8051	0.6828	0.695	0.7401	1.0703	0.7096	0.862	0.6606	0.6835	0.717	0.9439	0.7078	0.8215	0.5733	0.6346	0.7618	1.0544	0.7602	0.9512	0.6831	0.7275	0.776	1.0307	0.7404	0.8708	0.5966	0.7148	0.8369	1.0997	0.7654	0.8896	0.7207	0.7315	0.7684	0.978	0.7201	0.8467	0.6285	0.7036	0.7738	1.0479	0.7406	0.867	0.7325
31200s	0.6587	0.722	0.7437	0.9592	0.7092	0.8118	0.6861	0.7007	0.7458	1.0779	0.7138	0.8713	0.664	0.6878	0.721	0.9493	0.7141	0.8273	0.5751	0.6356	0.7676	1.0647	0.7674	0.9639	0.6864	0.7337	0.7837	1.0406	0.7482	0.8788	0.6005	0.7179	0.8472	1.1077	0.774	0.8954	0.7267	0.7386	0.7772	0.986	0.7276	0.8543	0.6319	0.7029	0.784	1.0597	0.7486	0.8722	0.7384
31800s	0.6623	0.7262	0.7495	0.9665	0.7147	0.8178	0.6949	0.7058	0.752	1.0858	0.718	0.872	0.6674	0.6929	0.7269	0.9581	0.72	0.8341	0.577	0.6412	0.7767	1.075	0.7782	0.9765	0.6903	0.7396	0.7912	1.0573	0.7558	0.8899	0.6045	0.7245	0.8576	1.1168	0.7838	0.9052	0.7321	0.7453	0.7842	0.9952	0.7337	0.8638	0.6363	0.7103	0.7983	1.0755	0.7569	0.8835	0.7433
32400s	0.6674	0.7323	0.756	0.9792	0.7207	0.8234	0.7012	0.7119	0.7585	1.0923	0.7233	0.871	0.6708	0.6978	0.7336	0.9692	0.7271	0.8443	0.5811	0.6458	0.7857	1.0865	0.7854	0.9858	0.6942	0.7467	0.8	1.0771	0.7642	0.9041	0.6078	0.7291	0.8678	1.126	0.7897	0.9111	0.7358	0.7517	0.7939	1.008	0.7407	0.8737	0.6402	0.7153	0.8081	1.0856	0.7645	0.889	0.7478
33000s	0.6716	0.7378	0.7608	0.9838	0.7251	0.8282	0.7005	0.7159	0.7639	1.098	0.7271	0.8762	0.6735	0.7022	0.7372	0.9733	0.7316	0.8461	0.5831	0.6473	0.7908	1.0936	0.7897	0.9945	0.6968	0.7513	0.8043	1.0831	0.7702	0.9113	0.6111	0.7307	0.8811	1.1325	0.7962	0.9154	0.7394	0.7578	0.8001	1.0119	0.7457	0.8788	0.6448	0.7195	0.8163	1.0929	0.77	0.8906	0.7509
33600s	0.6765	0.7443	0.7682	0.9895	0.7299	0.8334	0.7106	0.7216	0.7706	1.1047	0.7316	0.8709	0.6768	0.7067	0.7437	0.9827	0.737	0.8515	0.5867	0.6528	0.8006	1.1029	0.7944	1.0024	0.7003	0.7564	0.8097	1.0926	0.7756	0.9265	0.6166	0.7362	0.8943	1.1442	0.8039	0.922	0.7433	0.7648	0.8075	1.0204	0.7506	0.8884	0.6495	0.7233	0.8261	1.1074	0.7762	0.899	0.7581
34200s	0.6815	0.7496	0.7735	1.0009	0.7337	0.8371	0.7175	0.7263	0.7766	1.111	0.7342	0.8712	0.6808	0.7113	0.7499	0.994	0.742	0.8593	0.5898	0.6579	0.809	1.1154	0.8023	1.0082	0.7051	0.7625	0.8158	1.1071	0.7819	0.9389	0.622	0.7389	0.9041	1.1562	0.8102	0.9268	0.7459	0.7704	0.8168	1.0329	0.7556	0.8958	0.654	0.7281	0.8351	1.1165	0.7822	0.9033	0.7619
34800s	0.6878	0.7562	0.7792	1.0067	0.7383	0.8422	0.7276	0.7312	0.7824	1.1206	0.7383	0.8737	0.6839	0.7149	0.7568	1.0038	0.7464	0.8661	0.593	0.6621	0.8175	1.1265	0.8129	1.0184	0.7113	0.7685	0.8251	1.1216	0.788	0.9549	0.6287	0.7453	0.9165	1.1683	0.8178	0.9353	0.7485	0.7758	0.8227	1.0443	0.7586	0.905	0.6581	0.7319	0.8446	1.1312	0.7885	0.9125	0.7679
35400s	0.6951	0.7619	0.7856	1.0204	0.742	0.846	0.7358	0.7366	0.7883	1.1261	0.7422	0.8754	0.6866	0.7189	0.7626	1.0131	0.7507	0.8714	0.5957	0.6665	0.8247	1.135	0.8176	1.0238	0.7165	0.772	0.8321	1.1319	0.7917	0.9646	0.6319	0.7479	0.927	1.177	0.8248	0.9418	0.7526	0.7821	0.8333	1.0593	0.7627	0.9153	0.6622	0.7379	0.8554	1.1405	0.7939	0.9228	0.7706
36000s	0.6998	0.7671	0.7906	1.0194	0.7441	0.8484	0.7312	0.7392	0.7913	1.1283	0.7431	0.872	0.6893	0.7247	0.7665	1.0138	0.7546	0.8722	0.5986	0.6693	0.8297	1.1453	0.8162	1.0279	0.7204	0.7789	0.8333	1.1379	0.797	0.9666	0.637	0.7483	0.9338	1.1824	0.8269	0.9401	0.7575	0.79	0.8381	1.056	0.7664	0.9154	0.6667	0.7405	0.8605	1.1417	0.7978	0.9186	0.7786
36600s	0.7053	0.772	0.7959	1.0251	0.7468	0.8517	0.7374	0.744	0.7971	1.1323	0.746	0.8765	0.6929	0.7285	0.7725	1.0231	0.7581	0.8766	0.6019	0.6733	0.8391	1.1524	0.8246	1.0304	0.7222	0.782	0.8385	1.1465	0.8004	0.9753	0.6401	0.7507	0.9426	1.1904	0.8327	0.9435	0.76	0.7952	0.8453	1.0668	0.7696	0.9243	0.6705	0.7457	0.8678	1.1518	0.8032	0.9245	0.78
37200s	0.711	0.7774	0.8	1.0293	0.7493	0.8542	0.7331	0.747	0.8025	1.1352	0.7487	0.8748	0.6962	0.7332	0.7755	1.0257	0.7611	0.8749	0.6044	0.6759	0.8441	1.1566	0.8267	1.0346	0.7274	0.7878	0.8424	1.1495	0.8045	0.9777	0.6429	0.7523	0.9492	1.1956	0.837	0.9454	0.7631	0.8018	0.8514	1.0699	0.7728	0.9282	0.6737	0.7501	0.8734	1.1547	0.8065	0.923	0.7847
37800s	0.7163	0.7821	0.8051	1.0337	0.752	0.8569	0.7305	0.7516	0.8074	1.1449	0.7509	0.8778	0.6984	0.7371	0.7811	1.0336	0.7641	0.8791	0.6077	0.6807	0.8536	1.166	0.8343	1.0396	0.7332	0.7939	0.8492	1.158	0.8092	0.9877	0.6464	0.7583	0.9514	1.2031	0.8417	0.9505	0.7645	0.8056	0.8562	1.0768	0.7746	0.9344	0.6772	0.7545	0.8786	1.1651	0.8106	0.9291	0.7881
38400s	0.7213	0.7869	0.8096	1.0375	0.7549	0.8585	0.7337	0.7556	0.8119	1.1475	0.7532	0.8794	0.7002	0.7412	0.7851	1.035	0.7665	0.8793	0.6098	0.6842	0.8595	1.1705	0.8359	1.0427	0.7356	0.7974	0.8526	1.1637	0.8122	0.9939	0.6483	0.7634	0.9434	1.2076	0.8445	0.9528	0.7678	0.8099	0.8629	1.0811	0.7775	0.9393	0.6794	0.7597	0.8819	1.169	0.8136	0.929	0.7886
39000s	0.7263	0.7931	0.8146	1.0382	0.7574	0.8611	0.7397	0.7593	0.8159	1.151	0.7557	0.88	0.7019	0.7453	0.7901	1.038	0.7691	0.8801	0.6119	0.6879	0.8658	1.1744	0.8367	1.0487	0.7425	0.8009	0.8571	1.168	0.8141	1.0011	0.6498	0.7673	0.9349	1.2126	0.8477	0.9537	0.7716	0.8142	0.8686	1.0804	0.7796	0.9426	0.6833	0.7647	0.8847	1.1757	0.817	0.9302	0.7927
39600s	0.7326	0.7966	0.8179	1.0508	0.7604	0.8637	0.743	0.7634	0.8218	1.1607	0.7583	0.8832	0.7062	0.749	0.7974	1.0549	0.7717	0.8899	0.6172	0.6945	0.878	1.1843	0.8485	1.0534	0.7454	0.8035	0.8642	1.1831	0.8167	1.0167	0.6522	0.7723	0.924	1.2208	0.8542	0.9639	0.7776	0.8174	0.8752	1.1017	0.7823	0.9576	0.6851	0.7695	0.8952	1.1862	0.8217	0.9395	0.7961
40200s	0.738	0.8018	0.8226	1.0491	0.7619	0.8655	0.7463	0.7666	0.8233	1.1609	0.7594	0.8862	0.7095	0.7534	0.8013	1.0525	0.7735	0.8905	0.6162	0.698	0.8818	1.1916	0.8462	1.0566	0.7489	0.8092	0.8668	1.1852	0.819	1.0197	0.6534	0.7778	0.908	1.2241	0.8561	0.9596	0.781	0.8214	0.8806	1.0994	0.785	0.96	0.687	0.7741	0.8944	1.1882	0.8233	0.9405	0.7982
40800s	0.7433	0.8035	0.8258	1.0497	0.764	0.8666	0.7483	0.7699	0.8272	1.1621	0.7604	0.8835	0.7113	0.7562	0.8045	1.056	0.7746	0.8889	0.6159	0.7006	0.8877	1.1922	0.8483	1.0585	0.7518	0.8122	0.871	1.1867	0.8211	1.0232	0.6542	0.7824	0.8952	1.2273	0.8577	0.9585	0.7844	0.8244	0.8861	1.1055	0.7859	0.9659	0.6883	0.7783	0.8955	1.19	0.8256	0.9385	0.8026
41400s	0.747	0.807	0.8292	1.0498	0.7652	0.8684	0.7517	0.7736	0.8301	1.1648	0.7619	0.8843	0.7156	0.7598	0.8076	1.0582	0.7759	0.8892	0.6186	0.7047	0.8948	1.1968	0.8502	1.0623	0.7536	0.8141	0.8737	1.1894	0.8224	1.0275	0.6556	0.7862	0.8867	1.2305	0.8593	0.9568	0.7891	0.8271	0.8908	1.1072	0.7869	0.9688	0.6894	0.7817	0.8968	1.1951	0.8271	0.9386	0.8058
42000s	0.7534	0.8095	0.8332	1.0547	0.767	0.87	0.754	0.7769	0.8332	1.1708	0.7632	0.8869	0.7189	0.7635	0.8131	1.067	0.778	0.8936	0.6217	0.7103	0.9039	1.2042	0.8516	1.0651	0.7612	0.8199	0.881	1.1985	0.8251	1.0357	0.658	0.7914	0.8803	1.2349	0.8619	0.9615	0.7933	0.8309	0.898	1.1174	0.7881	0.978	0.6909	0.786	0.9027	1.2011	0.8299	0.9423	0.8089
42600s	0.7599	0.8145	0.8381	1.0567	0.7692	0.8716	0.756	0.7804	0.8364	1.1723	0.7651	0.8869	0.7208	0.7664	0.8151	1.0681	0.7788	0.8944	0.624	0.7135	0.9086	1.2067	0.8524	1.0684	0.7645	0.8233	0.8849	1.2022	0.8269	1.0382	0.6585	0.7959	0.8686	1.2376	0.8622	0.9606	0.7959	0.8335	0.902	1.1191	0.7879	0.9781	0.6926	0.7887	0.9054	1.2037	0.8306	0.9435	0.8125
43200s	0.7659	0.8189	0.8435	1.0606	0.771	0.8732	0.7563	0.7834	0.8391	1.1759	0.7657	0.8905	0.7235	0.7697	0.8217	1.0786	0.7798	0.8992	0.6262	0.7175	0.9154	1.2115	0.8568	1.0688	0.7659	0.8259	0.8904	1.2063	0.828	1.042	0.6596	0.7991	0.8605	1.2408	0.8662	0.9619	0.7992	0.8369	0.9105	1.1324	0.7897	0.9864	0.6929	0.7921	0.9142	1.2066	0.8329	0.9491	0.8171
43800s	0.7646	0.8193	0.8469	1.055	0.771	0.8742	0.7578	0.7841	0.8417	1.1759	0.7656	0.8899	0.7265	0.7727	0.8216	1.0704	0.7793	0.8959	0.6275	0.7205	0.9184	1.2128	0.8563	1.0756	0.7685	0.8285	0.8933	1.2099	0.8289	1.0452	0.6617	0.8028	0.8494	1.2429	0.8657	0.9604	0.8022	0.8398	0.9136	1.1232	0.7887	0.9826	0.6945	0.7943	0.9147	1.2102	0.8328	0.9482	0.817
44400s	0.767	0.8209	0.8496	1.0571	0.7721	0.8754	0.76	0.7866	0.8437	1.1754	0.7664	0.8896	0.7286	0.7754	0.8245	1.0735	0.7797	0.8945	0.6291	0.7227	0.925	1.216	0.8575	1.075	0.7699	0.83	0.8969	1.2097	0.8295	1.0477	0.663	0.8058	0.838	1.2448	0.8678	0.9585	0.8055	0.8427	0.9193	1.1288	0.7894	0.9882	0.6962	0.7977	0.9203	1.2127	0.8337	0.945	0.8185
45000s	0.7713	0.8251	0.8539	1.0635	0.7736	0.8775	0.7614	0.7902	0.8485	1.1815	0.7669	0.8926	0.733	0.7788	0.8304	1.0858	0.7806	0.9021	0.6308	0.7263	0.9321	1.2199	0.8612	1.0784	0.7728	0.8334	0.9044	1.2191	0.8303	1.0555	0.6645	0.8098	0.8298	1.2479	0.8705	0.9612	0.8096	0.8464	0.9254	1.1438	0.7897	1.0009	0.6973	0.8013	0.9272	1.2156	0.8348	0.95	0.8231
45600s	0.7729	0.8279	0.8579	1.0558	0.7742	0.878	0.7618	0.7918	0.8487	1.178	0.7671	0.8915	0.7348	0.782	0.8312	1.0784	0.7801	0.8986	0.6319	0.7297	0.9323	1.222	0.8589	1.0815	0.7749	0.8371	0.9071	1.2194	0.8311	1.056	0.6635	0.8133	0.819	1.249	0.869	0.9586	0.8154	0.8496	0.9304	1.1366	0.7892	0.9968	0.6982	0.8034	0.9247	1.2157	0.8342	0.948	0.8264
46200s	0.7738	0.8299	0.8601	1.0567	0.7744	0.8795	0.7629	0.7929	0.8505	1.1772	0.7674	0.8906	0.7367	0.785	0.8358	1.0834	0.7805	0.8979	0.633	0.7327	0.9346	1.2246	0.8572	1.0826	0.775	0.839	0.9111	1.2218	0.831	1.0582	0.6649	0.8158	0.8124	1.2499	0.8711	0.9595	0.8234	0.8527	0.9393	1.1401	0.7895	1.0028	0.6995	0.8063	0.9308	1.2185	0.8351	0.9493	0.8313
46800s	0.778	0.8338	0.8653	1.0582	0.7756	0.8807	0.7645	0.7958	0.8538	1.1825	0.7682	0.8924	0.7388	0.7887	0.8431	1.0941	0.7821	0.904	0.6353	0.7364	0.9399	1.2306	0.8626	1.0807	0.7766	0.8408	0.9158	1.2256	0.8311	1.0655	0.6659	0.8185	0.8067	1.2533	0.875	0.9614	0.8276	0.8564	0.9496	1.1466	0.789	1.0114	0.7011	0.8087	0.9372	1.2242	0.8357	0.9479	0.835
47400s	0.7782	0.833	0.8626	1.0526	0.7754	0.881	0.7645	0.7955	0.8561	1.1815	0.7667	0.8919	0.7407	0.7912	0.8446	1.0923	0.7808	0.9022	0.6368	0.7381	0.9415	1.2313	0.8619	1.0859	0.7803	0.8447	0.9215	1.2296	0.8318	1.0655	0.6666	0.8218	0.7934	1.2551	0.8738	0.9609	0.8308	0.8606	0.957	1.148	0.7892	1.0136	0.7019	0.8123	0.9386	1.2231	0.8352	0.9497	0.8381
48000s	0.7816	0.8384	0.8679	1.0561	0.7765	0.8825	0.7655	0.799	0.8561	1.1838	0.7681	0.8927	0.7412	0.7927	0.8475	1.0907	0.7801	0.9007	0.6373	0.7394	0.9458	1.2311	0.8613	1.0874	0.7824	0.8473	0.9301	1.2301	0.832	1.0688	0.668	0.8247	0.7844	1.2562	0.8742	0.9628	0.8335	0.8671	0.9627	1.1481	0.7878	1.018	0.7032	0.8142	0.94	1.2266	0.8359	0.9484	0.8381
48599s	0.7825	0.8403	0.8721	1.0532	0.7768	0.8828	0.765	0.8004	0.8558	1.185	0.7677	0.892	0.7438	0.7963	0.8525	1.0892	0.781	0.9013	0.6393	0.7431	0.9458	1.2371	0.8592	1.0891	0.784	0.8477	0.9376	1.2319	0.8313	1.0693	0.6683	0.8276	0.7707	1.2577	0.8747	0.9618	0.8357	0.8745	0.9676	1.1467	0.7875	1.0177	0.7047	0.8179	0.941	1.225	0.8356	0.9448	0.8403
49199s	0.7833	0.8404	0.8774	1.058	0.7767	0.8838	0.7657	0.8019	0.8613	1.1901	0.7685	0.8924	0.7455	0.7981	0.8569	1.0983	0.7796	0.9037	0.64	0.7444	0.9509	1.237	0.8632	1.089	0.7912	0.8541	0.9461	1.2369	0.8322	1.0762	0.6684	0.8309	0.761	1.2601	0.8771	0.9639	0.8351	0.8788	0.9716	1.1602	0.7867	1.0268	0.7064	0.8199	0.9501	1.2304	0.8359	0.9473	0.8404
49799s	0.7864	0.843	0.8847	1.0553	0.7767	0.884	0.7657	0.8023	0.8596	1.1887	0.7676	0.8921	0.7475	0.8006	0.8603	1.0957	0.7797	0.9034	0.6413	0.7473	0.9503	1.2418	0.8609	1.0922	0.7946	0.8599	0.9503	1.24	0.8312	1.0778	0.6689	0.833	0.7456	1.2622	0.8752	0.9628	0.8368	0.8827	0.9748	1.1585	0.7862	1.0253	0.7082	0.8231	0.9515	1.23	0.8346	0.9489	0.8384
50400s	0.7922	0.8469	0.8883	1.0575	0.7767	0.8842	0.7657	0.8035	0.8611	1.1834	0.768	0.8917	0.7502	0.8028	0.8629	1.0891	0.7789	0.8969	0.6419	0.7485	0.9488	1.2393	0.8532	1.0927	0.799	0.8673	0.9557	1.2407	0.8312	1.077	0.6693	0.8365	0.7371	1.2618	0.8727	0.9632	0.8373	0.8855	0.9778	1.15	0.7849	1.0239	0.7101	0.8251	0.953	1.2312	0.8339	0.9407	0.8402
50999s	0.7966	0.853	0.8898	1.0607	0.7768	0.8853	0.7651	0.8057	0.8593	1.1841	0.7676	0.8921	0.7541	0.8048	0.8682	1.0987	0.7783	0.899	0.643	0.751	0.952	1.2415	0.8578	1.0911	0.7982	0.8684	0.9582	1.2406	0.8295	1.0781	0.6696	0.8373	0.7254	1.2623	0.8756	0.9638	0.8374	0.8878	0.9815	1.1561	0.7838	1.0291	0.714	0.8282	0.9609	1.2336	0.8349	0.9492	0.8396
51599s	0.797	0.8577	0.8933	1.0616	0.7765	0.8847	0.7675	0.8064	0.8577	1.1805	0.7677	0.8926	0.7587	0.8069	0.8742	1.0962	0.7773	0.8947	0.6439	0.7523	0.9496	1.2408	0.8568	1.0922	0.7978	0.8698	0.9609	1.2378	0.8284	1.0748	0.6705	0.8397	0.716	1.2619	0.8755	0.9629	0.8376	0.8899	0.9834	1.151	0.7823	1.0274	0.7174	0.8304	0.9595	1.2349	0.8335	0.9425	0.8395
52199s	0.799	0.8638	0.896	1.0638	0.7769	0.8852	0.7675	0.8074	0.8573	1.1816	0.7671	0.8924	0.7612	0.8086	0.8814	1.101	0.7763	0.8954	0.6446	0.754	0.9513	1.2419	0.8592	1.0926	0.8011	0.8738	0.9644	1.2412	0.8289	1.0794	0.6721	0.8433	0.7066	1.264	0.8757	0.9645	0.8383	0.8915	0.9871	1.1613	0.7816	1.0319	0.7195	0.8354	0.9629	1.2348	0.8335	0.9428	0.8392
52799s	0.7986	0.8677	0.9219	1.0653	0.7766	0.8852	0.7706	0.8082	0.8618	1.1814	0.7674	0.8929	0.7624	0.8119	0.8888	1.0934	0.7754	0.8908	0.6458	0.7552	0.9524	1.2427	0.8609	1.092	0.8022	0.8766	0.9681	1.24	0.8286	1.0836	0.6723	0.8488	0.6933	1.2652	0.8754	0.9655	0.8379	0.8937	0.9893	1.1527	0.7809	1.0299	0.7214	0.8405	0.9615	1.2383	0.833	0.9448	0.8374
53399s	0.8007	0.8722	1.0069	1.0677	0.7771	0.8856	0.7737	0.8094	0.8674	1.1824	0.7671	0.8943	0.7628	0.8149	0.8924	1.0989	0.7741	0.89	0.6465	0.7564	0.9515	1.242	0.8608	1.0922	0.8029	0.8788	0.9718	1.244	0.828	1.0841	0.6739	0.8549	0.6785	1.2663	0.8768	0.9657	0.8382	0.8948	0.9928	1.1628	0.7789	1.0348	0.7217	0.8462	0.9645	1.2375	0.8324	0.9456	0.8414
53999s	0.8004	0.8736	0.942	1.0693	0.7769	0.8851	0.7755	0.8098	0.8699	1.1757	0.7662	0.8941	0.7637	0.8201	0.8968	1.0959	0.7734	0.8889	0.6476	0.7589	0.9535	1.2444	0.8619	1.0904	0.8009	0.8782	0.9729	1.2404	0.8258	1.085	0.6748	0.8601	0.6712	1.2659	0.8774	0.9657	0.8376	0.8966	0.9943	1.1541	0.7769	1.0356	0.7232	0.8503	0.9624	1.2382	0.8316	0.9421	0.8395
54599s	0.8004	0.8772	0.9534	1.0712	0.7774	0.8853	0.7762	0.8109	0.8775	1.1759	0.7659	0.8939	0.7643	0.8255	0.8996	1.0982	0.7721	0.8882	0.6481	0.7599	0.9531	1.2458	0.8613	1.0968	0.802	0.8803	0.9759	1.248	0.8255	1.0876	0.6766	0.8645	0.662	1.2667	0.8766	0.9663	0.8377	0.8978	0.9972	1.1619	0.7751	1.0346	0.7237	0.8523	0.9616	1.2354	0.8308	0.941	0.8406
55199s	0.8004	0.8788	0.9546	1.0731	0.777	0.8857	0.7763	0.8119	0.8862	1.1755	0.7659	0.8943	0.7643	0.83	0.9026	1.1033	0.7716	0.8883	0.6487	0.7623	0.9573	1.2467	0.8621	1.094	0.8026	0.8809	0.9785	1.2497	0.8234	1.0911	0.679	0.867	0.6499	1.2672	0.8785	0.9677	0.8376	0.9002	1.0004	1.1692	0.7733	1.0422	0.7245	0.8548	0.9652	1.2386	0.8297	0.9438	0.8389
55799s	0.7983	0.8783	0.9548	1.0749	0.7766	0.8851	0.775	0.8123	0.8853	1.1752	0.7639	0.8938	0.7651	0.8331	0.9054	1.1084	0.7706	0.8872	0.6499	0.7634	0.9613	1.2474	0.8619	1.0974	0.8039	0.8832	0.982	1.2549	0.8221	1.0963	0.6817	0.8694	0.6275	1.2692	0.8775	0.9683	0.8378	0.9015	1.0029	1.1739	0.7708	1.0464	0.7255	0.8559	0.9654	1.2409	0.8287	0.9413	0.8382
56399s	0.8003	0.8812	0.9721	1.0773	0.7764	0.8857	0.7742	0.8141	0.8875	1.1764	0.7637	0.8941	0.7655	0.8351	0.9086	1.1174	0.7706	0.8918	0.6516	0.766	0.9677	1.251	0.8657	1.0939	0.8029	0.8842	0.985	1.2566	0.8207	1.1008	0.6845	0.871	0.6181	1.2707	0.8789	0.9683	0.8383	0.9029	1.006	1.1793	0.7688	1.0514	0.7254	0.8572	0.9685	1.2421	0.8276	0.9438	0.8416
56999s	0.8003	0.8838	0.9758	1.0796	0.7764	0.8858	0.7744	0.8175	0.8911	1.1754	0.7635	0.8937	0.7656	0.8365	0.9102	1.1096	0.7691	0.8849	0.6529	0.7672	0.9684	1.2503	0.8605	1.0981	0.8037	0.8858	0.9887	1.2559	0.8197	1.0996	0.6881	0.8727	0.5995	1.2696	0.8755	0.9669	0.8377	0.9042	1.0072	1.1718	0.7663	1.0454	0.7254	0.8582	0.9661	1.2394	0.8254	0.9452	0.8429
57599s	0.7997	0.8905	0.983	1.081	0.7764	0.886	0.7724	0.8201	0.8893	1.1749	0.7624	0.8929	0.7652	0.838	0.9119	1.1154	0.7659	0.8837	0.6546	0.7684	0.9763	1.2492	0.863	1.0995	0.8026	0.8861	0.9904	1.2576	0.8171	1.1016	0.6911	0.8741	0.592	1.2704	0.8766	0.9685	0.8374	0.9057	1.01	1.1745	0.7637	1.0524	0.7266	0.859	0.9697	1.2419	0.8245	0.9424	0.8435
58199s	0.7986	0.8923	1.0796	1.0831	0.7754	0.8859	0.7737	0.8238	0.8922	1.1766	0.7616	0.8931	0.7649	0.839	0.9139	1.1145	0.7644	0.8805	0.6553	0.7694	0.9766	1.2494	0.8619	1.0995	0.8023	0.8869	0.9928	1.2597	0.815	1.1027	0.694	0.8751	0.5842	1.2712	0.8754	0.9669	0.8381	0.9072	1.0121	1.1753	0.7613	1.0537	0.7264	0.861	0.9708	1.2417	0.8227	0.946	0.8433
58799s	0.8001	0.8964	1.0272	1.0854	0.7751	0.8865	0.7827	0.8275	0.897	1.176	0.7603	0.8922	0.7666	0.84	0.9156	1.1076	0.7622	0.8738	0.6564	0.7714	0.9769	1.2497	0.8619	1.0975	0.8037	0.8885	0.9947	1.2617	0.813	1.1021	0.6949	0.8771	0.575	1.2721	0.8758	0.9665	0.8379	0.9113	1.0133	1.1746	0.7582	1.0501	0.7272	0.8627	0.9699	1.2417	0.821	0.9417	0.8469
59399s	0.8008	0.8997	1.0323	1.0878	0.7751	0.8861	0.7835	0.8296	0.9769	1.1699	0.7605	0.8936	0.7677	0.8413	0.9193	1.1174	0.7616	0.8764	0.6587	0.7754	0.9789	1.2527	0.8603	1.095	0.8034	0.8897	0.9969	1.2624	0.8102	1.1003	0.6957	0.8775	0.5713	1.2718	0.8737	0.9656	0.8384	0.913	1.0155	1.1804	0.7554	1.0532	0.7281	0.8635	0.972	1.242	0.8188	0.942	0.8469
59999s	0.8023	0.9006	1.0394	1.0906	0.7747	0.8866	0.7751	0.8326	0.9842	1.1702	0.7592	0.8926	0.7666	0.8419	0.9191	1.1163	0.7585	0.8708	0.6583	0.7765	0.9821	1.2502	0.8645	1.0989	0.804	0.8911	0.9991	1.2665	0.808	1.1034	0.6968	0.8798	0.5673	1.2732	0.8765	0.9673	0.8412	0.9132	1.0171	1.1871	0.7521	1.0579	0.729	0.8648	0.975	1.2433	0.817	0.9443	0.8473
60599s	0.8053	0.9018	1.0436	1.0927	0.7746	0.8857	0.7718	0.8379	0.9769	1.1662	0.7583	0.8929	0.7661	0.8427	0.9209	1.1204	0.7565	0.8693	0.6614	0.7808	0.9808	1.252	0.8617	1.0963	0.8035	0.8915	1.0001	1.2667	0.8053	1.0997	0.6957	0.881	0.5629	1.273	0.8722	0.9662	0.8425	0.9155	1.0185	1.1906	0.7491	1.0583	0.7296	0.8664	0.9746	1.242	0.8148	0.941	0.8482
61199s	0.8093	0.9046	1.048	1.0946	0.7743	0.8865	0.7725	0.8425	1.0291	1.163	0.7576	0.8948	0.7667	0.8432	0.9237	1.1232	0.7554	0.868	0.6629	0.7865	0.9816	1.2527	0.8604	1.0942	0.8028	0.8929	1.0027	1.2672	0.8035	1.099	0.6965	0.882	0.5593	1.2733	0.869	0.9657	0.844	0.9158	1.0199	1.1879	0.746	1.0593	0.7293	0.8671	0.9734	1.2412	0.8121	0.9384	0.8496
61799s	0.8174	0.9053	1.0514	1.0955	0.773	0.8858	0.7595	0.8443	1.0708	1.1601	0.7561	0.8922	0.7667	0.8445	0.9258	1.1216	0.753	0.864	0.6643	0.7905	0.9842	1.2529	0.8582	1.0956	0.8036	0.8918	1.003	1.2674	0.7999	1.0966	0.6964	0.8818	0.555	1.2739	0.8688	0.9658	0.8452	0.9191	1.0218	1.185	0.7431	1.0589	0.7294	0.8678	0.9749	1.2426	0.8092	0.9371	0.8512
62399s	0.8385	0.9071	1.0538	1.0961	0.7717	0.8851	0.7326	0.8494	1.0544	1.1619	0.7552	0.8925	0.7667	0.8458	0.9266	1.1202	0.7508	0.8593	0.6643	0.7916	0.987	1.2515	0.8605	1.1008	0.8068	0.8941	1.0058	1.2725	0.7981	1.1	0.6969	0.8846	0.555	1.276	0.8688	0.9677	0.8453	0.9204	1.0222	1.1945	0.7391	1.0625	0.7299	0.8681	0.9756	1.2456	0.8068	0.9358	0.8538
62999s	0.8517	0.9113	1.0558	1.0961	0.7716	0.885	0.7273	0.8301	1.0417	1.1556	0.7539	0.8918	0.7686	0.8462	0.9288	1.1208	0.749	0.856	0.6666	0.7946	0.9864	1.2541	0.8551	1.0948	0.8063	0.8941	1.0067	1.2702	0.7945	1.0921	0.6969	0.8844	0.5498	1.2744	0.8629	0.9643	0.8464	0.9214	1.0235	1.1847	0.7359	1.0564	0.7293	0.8686	0.9754	1.243	0.8044	0.9348	0.8559
63599s	0.8735	0.9126	1.0564	1.0963	0.7704	0.8851	0.7158	0.8184	1.0347	1.1519	0.7523	0.8905	0.7693	0.8477	0.9301	1.1219	0.7463	0.8512	0.6677	0.795	0.9888	1.2528	0.8556	1.0963	0.8074	0.8975	1.0083	1.2749	0.7921	1.0933	0.697	0.8859	0.5489	1.2754	0.8626	0.9646	0.8505	0.9228	1.0245	1.1895	0.7329	1.0588	0.7314	0.869	0.9769	1.2429	0.8013	0.9334	0.8577
64199s	0.8806	0.916	1.0581	1.0965	0.7697	0.8849	0.7164	0.8204	1.0334	1.15	0.7514	0.8905	0.7703	0.8479	0.9318	1.1359	0.7445	0.8542	0.6702	0.7961	0.9888	1.2542	0.8548	1.0926	0.8096	0.8977	1.0094	1.275	0.7892	1.0886	0.6979	0.8864	0.5464	1.2746	0.8598	0.9638	0.8507	0.9229	1.0251	1.2009	0.7294	1.0619	0.7317	0.8687	0.9783	1.2406	0.7983	0.9337	0.8563
64799s	0.8839	0.9178	1.0592	1.0966	0.7683	0.8848	0.728	0.817	1.0295	1.1469	0.7498	0.8902	0.7722	0.8482	0.9326	1.1347	0.7406	0.8489	0.6713	0.7957	0.9921	1.252	0.8562	1.094	0.8104	0.9004	1.0103	1.2774	0.7866	1.0905	0.6981	0.8863	0.5437	1.2754	0.8598	0.9644	0.854	0.9233	1.0262	1.204	0.7261	1.0649	0.7324	0.8699	0.98	1.2431	0.7959	0.9336	0.861
65399s	0.8859	0.919	1.0607	1.097	0.7676	0.8838	0.8152	0.8057	1.0262	1.1317	0.7485	0.8897	0.7726	0.8489	0.9336	1.1303	0.7382	0.8429	0.6727	0.7971	0.9896	1.2525	0.8476	1.0874	0.8116	0.8957	1.0101	1.2751	0.783	1.0812	0.6991	0.886	0.5401	1.2745	0.8551	0.9608	0.8559	0.9232	1.0258	1.1924	0.7225	1.0573	0.7294	0.8706	0.9795	1.2405	0.7924	0.9316	0.8636
65999s	0.8882	0.9209	1.0621	1.0971	0.7666	0.8842	0.9773	0.8204	1.0279	1.1176	0.7474	0.8891	0.7733	0.8499	0.9349	1.1282	0.7367	0.8392	0.6733	0.7978	0.9895	1.253	0.8446	1.0836	0.8152	0.8957	1.0109	1.2756	0.7808	1.0789	0.6976	0.8872	0.5372	1.2749	0.8502	0.9611	0.8579	0.9236	1.0258	1.1895	0.7194	1.0529	0.7286	0.8708	0.9803	1.2406	0.7902	0.931	0.8651
66599s	0.8887	0.9214	1.0634	1.0966	0.765	0.8832	0.9462	0.8986	1.0276	1.0962	0.7457	0.8876	0.7747	0.8495	0.935	1.1258	0.7322	0.8326	0.6741	0.7967	0.9901	1.2503	0.8433	1.0862	0.8207	0.8991	1.0117	1.2756	0.7778	1.0757	0.6987	0.8873	0.536	1.2747	0.8476	0.9611	0.8613	0.924	1.0268	1.1884	0.7162	1.053	0.7284	0.8709	0.9814	1.2419	0.7876	0.9314	0.8667
67199s	0.8554	0.9241	1.0645	1.0976	0.7644	0.8835	0.9514	1.0315	1.0296	1.0897	0.745	0.8883	0.7766	0.8495	0.9357	1.1374	0.7298	0.8342	0.6741	0.7966	0.9935	1.2514	0.8469	1.0848	0.822	0.8984	1.0113	1.2765	0.7747	1.0767	0.6991	0.8873	0.5344	1.2758	0.8497	0.9631	0.8649	0.9247	1.0266	1.2018	0.7131	1.057	0.7278	0.8706	0.9823	1.2446	0.7851	0.9307	0.8676
67799s	0.9102	0.9259	1.0661	1.0973	0.7628	0.8829	0.95	1.036	1.0306	1.076	0.7428	0.8874	0.7802	0.8508	0.9374	1.1181	0.7272	0.8237	0.675	0.7978	0.9879	1.2518	0.8362	1.0789	0.8261	0.8996	1.0125	1.2735	0.7726	1.0685	0.6995	0.8879	0.5321	1.2736	0.8393	0.9598	0.8698	0.9245	1.0254	1.1765	0.7093	1.0365	0.7288	0.8691	0.9805	1.2407	0.781	0.9294	0.8724
68399s	0.9662	0.9285	1.0675	1.098	0.7622	0.8836	0.951	1.0275	1.0322	1.0668	0.7423	0.8877	0.7846	0.8519	0.9385	1.1387	0.7256	0.8285	0.6753	0.7972	0.9931	1.2517	0.8433	1.0826	0.8329	0.9031	1.0123	1.2769	0.7694	1.0755	0.7033	0.8876	0.5309	1.2743	0.8435	0.963	0.8751	0.9248	1.0268	1.2009	0.7072	1.0534	0.731	0.8692	0.9826	1.2435	0.7798	0.9318	0.8768
68999s	0.9912	0.9293	1.0686	1.0972	0.7608	0.8831	0.9504	0.9802	1.0325	1.0669	0.7411	0.8866	0.7876	0.8509	0.9379	1.1379	0.7223	0.8234	0.6756	0.7973	0.9901	1.2507	0.8378	1.0795	0.8409	0.9071	1.012	1.2777	0.7672	1.0739	0.7054	0.8881	0.5293	1.274	0.8381	0.9628	0.8795	0.9241	1.0255	1.202	0.7038	1.0455	0.7292	0.869	0.9818	1.2416	0.7764	0.9314	0.8835
69599s	1.0202	0.9295	1.0699	1.098	0.7604	0.8816	0.9506	0.9599	1.0322	1.0668	0.7391	0.8858	0.7893	0.8534	0.9383	1.1346	0.7191	0.8201	0.6742	0.7969	0.9919	1.25	0.8383	1.078	0.8489	0.9035	1.0116	1.2765	0.7647	1.0763	0.7082	0.8886	0.5281	1.2732	0.8363	0.9637	0.8829	0.9246	1.0247	1.2002	0.7008	1.0445	0.7293	0.8686	0.9818	1.2423	0.7741	0.9335	0.8909
70199s	0.9922	0.9303	1.071	1.0972	0.7592	0.8809	0.9505	0.9597	1.0327	1.0671	0.7377	0.8854	0.7934	0.8576	0.9385	1.1388	0.7158	0.8155	0.6739	0.7983	0.9896	1.2496	0.8319	1.0739	0.8489	0.9026	1.0111	1.2772	0.7618	1.0718	0.7089	0.8883	0.5271	1.2721	0.8307	0.9601	0.886	0.9234	1.0236	1.2044	0.6977	1.0355	0.7284	0.8669	0.9849	1.2394	0.7704	0.9327	0.8923
70799s	0.9916	0.9289	1.0724	1.0971	0.7571	0.8799	0.9507	0.9596	1.0323	1.0662	0.7354	0.8853	0.8	0.8538	0.9392	1.1295	0.7131	0.805	0.6742	0.7977	0.9849	1.2494	0.8253	1.065	0.8576	0.9025	1.0109	1.2732	0.7589	1.0587	0.7082	0.8877	0.5245	1.2697	0.825	0.9558	0.8901	0.9239	1.0233	1.1886	0.6944	1.0205	0.7279	0.8674	0.9827	1.236	0.7672	0.928	0.8968
71399s	0.9603	0.9299	1.0746	1.0974	0.7569	0.8802	0.953	0.961	1.0335	1.0671	0.7347	0.8854	0.8034	0.8564	0.9393	1.1341	0.7109	0.8019	0.6744	0.798	0.9856	1.249	0.8262	1.0675	0.8591	0.9021	1.0095	1.2728	0.756	1.057	0.7047	0.8865	0.5234	1.2693	0.8247	0.9552	0.8952	0.9252	1.0318	1.1968	0.6923	1.0216	0.7271	0.8678	0.9826	1.2343	0.7653	0.928	0.9011
71999s	0.9452	0.9149	1.0757	1.0975	0.755	0.8789	0.9527	0.9595	1.0327	1.0653	0.7324	0.8831	0.8096	0.8493	0.9386	1.1215	0.7075	0.7913	0.6749	0.7969	0.9783	1.2474	0.8193	1.0587	0.8679	0.902	1.0091	1.2695	0.754	1.0491	0.7051	0.8857	0.5216	1.2675	0.8198	0.952	0.8981	0.9264	1.0348	1.1787	0.6891	1.0086	0.7279	0.8664	0.982	1.2321	0.7624	0.924	0.9072
72599s	0.9521	0.903	1.077	1.0979	0.7545	0.8798	0.9544	0.962	1.0346	1.067	0.731	0.8843	0.8141	0.8495	0.9383	1.1303	0.7055	0.7927	0.679	0.7967	0.982	1.2478	0.8204	1.0568	0.8687	0.9009	1.0083	1.2702	0.7517	1.0504	0.7079	0.885	0.521	1.2666	0.8182	0.9534	0.8988	0.9274	1.0332	1.1833	0.6861	1.0117	0.7266	0.8644	0.9806	1.2323	0.7599	0.9249	0.9068
73199s	0.9496	0.9419	1.0773	1.0975	0.7529	0.8784	0.9546	0.9613	1.0343	1.0657	0.7289	0.8828	0.8213	0.8486	0.938	1.1292	0.703	0.7871	0.6808	0.7961	0.9772	1.2465	0.8138	1.049	0.8723	0.9012	1.0079	1.2678	0.7491	1.0428	0.7099	0.885	0.5188	1.2638	0.8116	0.9502	0.8991	0.9259	1.0284	1.1781	0.6836	1.0024	0.7282	0.8638	0.9805	1.2283	0.7569	0.9234	0.9072
73799s	0.9452	1.0415	1.0777	1.0976	0.7515	0.8777	0.9555	0.9619	1.0345	1.0657	0.7276	0.8824	0.8248	0.8492	0.9377	1.1222	0.6995	0.7807	0.6792	0.7943	0.9775	1.2446	0.8145	1.0516	0.8768	0.9024	1.01	1.2672	0.746	1.0401	0.7091	0.8832	0.5182	1.2636	0.8116	0.9491	0.8987	0.926	1.0233	1.1719	0.6812	0.9955	0.7269	0.8637	0.9804	1.2298	0.7547	0.9207	0.907
74399s	0.9535	1.0049	1.0777	1.0972	0.7509	0.8782	0.9565	0.9623	1.0351	1.0654	0.7263	0.8814	0.8262	0.8482	0.936	1.1312	0.6965	0.7836	0.6765	0.7934	0.975	1.243	0.811	1.0476	0.8747	0.9004	1.0153	1.2654	0.7436	1.0383	0.7083	0.8825	0.5168	1.2619	0.8078	0.9485	0.8982	0.9258	1.0194	1.1791	0.6786	0.9998	0.7263	0.8622	0.9872	1.2267	0.7522	0.9193	0.9065
74999s	0.9566	1.0425	1.0778	1.097	0.7482	0.8779	0.9582	0.9622	1.035	1.0646	0.7247	0.881	0.8281	0.8476	0.9363	1.1341	0.6956	0.7814	0.678	0.7946	0.9756	1.2432	0.8073	1.0445	0.8755	0.9015	1.0158	1.2654	0.7411	1.0447	0.7103	0.8815	0.516	1.26	0.8046	0.947	0.8987	0.9256	1.017	1.1796	0.6764	0.999	0.725	0.8625	0.9884	1.2257	0.7494	0.9171	0.9064
75599s	0.9581	1.0054	1.0785	1.097	0.7481	0.8775	0.9608	0.9624	1.0358	1.0645	0.724	0.8802	0.83	0.8472	0.9346	1.136	0.6919	0.7736	0.6779	0.7922	0.9716	1.2398	0.8031	1.0403	0.8774	0.9017	1.013	1.2636	0.739	1.0382	0.7094	0.8807	0.5154	1.2586	0.8011	0.943	0.8979	0.9256	1.013	1.1825	0.6736	0.9912	0.7273	0.8614	0.9856	1.2226	0.7465	0.9138	0.9053
76199s	0.9598	0.9947	1.0876	1.0978	0.7475	0.8783	0.9621	0.9635	1.036	1.0643	0.7225	0.8801	0.831	0.8464	0.9348	1.1368	0.69	0.7672	0.6773	0.7925	0.9691	1.2394	0.8013	1.037	0.8778	0.9014	1.0092	1.2642	0.7367	1.0364	0.7217	0.8809	0.5136	1.2567	0.799	0.9422	0.8969	0.9268	1.0095	1.1891	0.6707	0.9827	0.7278	0.8595	0.9804	1.2213	0.7448	0.9148	0.9033
76799s	0.9633	0.9949	1.0863	1.0963	0.7455	0.8774	0.9625	0.9633	1.0357	1.0632	0.7218	0.8791	0.8353	0.8456	0.9337	1.1421	0.6872	0.7625	0.6814	0.7921	0.9677	1.238	0.7988	1.0343	0.8779	0.9017	1.0053	1.2631	0.7344	1.03	0.7247	0.8808	0.5129	1.2551	0.7977	0.9388	0.8974	0.927	1.0065	1.1973	0.6688	0.98	0.7308	0.8589	0.979	1.2191	0.7421	0.9124	0.9031
77399s	0.9679	0.9956	1.0801	1.0962	0.7444	0.8777	0.9631	0.9634	1.0367	1.0634	0.7194	0.8788	0.8382	0.8447	0.9331	1.1415	0.6843	0.7616	0.6762	0.7915	0.9679	1.2353	0.7961	1.0306	0.8811	0.9017	1.0013	1.26	0.7327	1.0245	0.7198	0.8787	0.5127	1.2529	0.7949	0.9339	0.896	0.9321	1.0044	1.2049	0.6663	0.9825	0.7233	0.8581	0.9728	1.2164	0.7398	0.9123	0.9021
77999s	0.9641	0.9959	1.0739	1.0958	0.7435	0.8773	0.9634	0.9643	1.0369	1.0626	0.7171	0.877	0.8396	0.8438	0.9414	1.1408	0.6833	0.7561	0.6758	0.7911	0.9646	1.2353	0.7925	1.0306	0.8787	0.9014	0.9981	1.2606	0.7299	1.0272	0.7184	0.8787	0.5117	1.2514	0.7916	0.933	0.8962	0.9356	1.001	1.2043	0.6642	0.9718	0.7205	0.8583	0.9721	1.2145	0.7375	0.9104	0.902
78599s	0.9731	1.0015	1.068	1.095	0.7421	0.8769	0.9632	0.9644	1.0374	1.0622	0.716	0.8766	0.8388	0.8433	0.9404	1.144	0.68	0.759	0.6748	0.7892	0.9642	1.2312	0.7897	1.0313	0.8803	0.9013	0.9945	1.2584	0.7282	1.0365	0.719	0.8793	0.5117	1.2494	0.7898	0.9335	0.896	0.9351	0.9982	1.2123	0.6621	0.9856	0.729	0.8573	0.9719	1.2139	0.736	0.9121	0.9036
79199s	0.9719	1.009	1.0642	1.0945	0.7416	0.8755	0.9638	0.965	1.0374	1.0617	0.7151	0.8766	0.8384	0.8425	0.9364	1.147	0.677	0.7579	0.6747	0.7895	0.9604	1.2305	0.7863	1.0251	0.8787	0.9025	0.9909	1.2563	0.7253	1.0358	0.7177	0.8788	0.5101	1.2473	0.7873	0.931	0.8957	0.931	0.9944	1.2163	0.6595	0.9787	0.7229	0.8563	0.9657	1.2113	0.7335	0.9096	0.9014
79799s	0.9675	1.0114	1.0602	1.0943	0.7403	0.8741	0.9624	0.9645	1.0368	1.0608	0.7131	0.8755	0.8381	0.8419	0.9321	1.1382	0.6753	0.7476	0.6754	0.7896	0.9546	1.2294	0.7836	1.023	0.8802	0.9006	0.9872	1.2548	0.7237	1.0316	0.7177	0.8809	0.5084	1.2452	0.7847	0.9289	0.8966	0.9276	0.9909	1.2043	0.6571	0.9626	0.7212	0.8556	0.963	1.2079	0.7314	0.908	0.9006
80399s	0.9631	1.0145	1.0578	1.0937	0.7395	0.8732	0.9631	0.9652	1.0371	1.0607	0.7123	0.8752	0.8373	0.8425	0.9278	1.1277	0.6726	0.7351	0.6745	0.7896	0.9492	1.2266	0.7803	1.0162	0.8819	0.9034	0.9859	1.2564	0.7217	1.0118	0.7169	0.8812	0.5072	1.2428	0.7806	0.9249	0.8966	0.9247	0.9876	1.1893	0.6546	0.9421	0.7218	0.8588	0.9584	1.2001	0.7288	0.9059	0.8993
80999s	0.9713	1.0175	1.0547	1.0931	0.7393	0.8732	0.9631	0.9667	1.0375	1.0605	0.7117	0.8749	0.8382	0.8416	0.9241	1.1348	0.6708	0.7363	0.6808	0.7868	0.9518	1.225	0.7788	1.0214	0.8806	0.9082	0.9819	1.2621	0.7199	1.0156	0.7152	0.8844	0.5069	1.2407	0.779	0.9237	0.8961	0.923	0.9852	1.1925	0.6529	0.9528	0.7212	0.8617	0.957	1.2029	0.7271	0.9075	0.8995
81599s	0.9711	1.0176	1.052	1.0962	0.7373	0.8709	0.9615	0.9652	1.0358	1.0586	0.7097	0.8728	0.8374	0.8413	0.921	1.1409	0.6684	0.7348	0.6825	0.7867	0.9469	1.2223	0.7758	1.0194	0.8815	0.9131	0.9801	1.2643	0.7179	1.014	0.7136	0.8896	0.5063	1.239	0.7751	0.9212	0.8955	0.9213	0.982	1.1963	0.6505	0.9516	0.7209	0.8595	0.9532	1.1997	0.7249	0.905	0.896
82199s	0.9703	1.0181	1.0501	1.0962	0.7375	0.8718	0.9622	0.9671	1.036	1.0594	0.7092	0.8741	0.8368	0.841	0.9202	1.139	0.6666	0.7334	0.6779	0.7853	0.9448	1.2206	0.773	1.0167	0.8804	0.9116	0.9752	1.2644	0.7154	1.0122	0.714	0.8885	0.506	1.2369	0.7736	0.9194	0.8959	0.9189	0.9785	1.191	0.6486	0.9481	0.7214	0.8543	0.9513	1.1992	0.7232	0.9038	0.8978
82799s	0.9701	1.0179	1.0473	1.0929	0.7359	0.8699	0.9606	0.9661	1.0349	1.0582	0.7077	0.8726	0.8361	0.8413	0.9146	1.1301	0.6644	0.7232	0.6771	0.7847	0.9352	1.2184	0.7699	1.0082	0.8808	0.91	0.9723	1.2626	0.7139	0.9971	0.7152	0.8892	0.5052	1.2351	0.7704	0.9141	0.8959	0.9162	0.9768	1.1761	0.6465	0.9245	0.7206	0.8509	0.9465	1.1935	0.7209	0.8993	0.8999
83399s	0.9772	1.0171	1.0453	1.0887	0.7347	0.8697	0.9605	0.9667	1.0341	1.0575	0.7067	0.8722	0.8355	0.8408	0.9114	1.1376	0.6625	0.7303	0.6798	0.7846	0.9331	1.2157	0.767	1.0104	0.8799	0.9084	0.9693	1.2593	0.7124	1.0083	0.7198	0.8847	0.5063	1.2327	0.7694	0.9165	0.8968	0.9131	0.9742	1.1784	0.6445	0.9452	0.7212	0.8478	0.9453	1.1944	0.7191	0.9016	0.8996
83999s	0.9789	1.0207	1.0428	1.0849	0.7339	0.8686	0.9599	0.9677	1.0332	1.057	0.7058	0.8721	0.8349	0.844	0.9082	1.1442	0.6603	0.7228	0.6857	0.783	0.926	1.2144	0.7646	1.0091	0.8804	0.9113	0.9665	1.2595	0.71	1.0109	0.7169	0.884	0.5052	1.2312	0.7657	0.9125	0.9014	0.9147	0.9714	1.1837	0.6426	0.9283	0.7204	0.8458	0.9422	1.1943	0.717	0.8984	0.8979
84599s	0.9849	1.0174	1.0401	1.0804	0.7323	0.8683	0.9587	0.9671	1.0316	1.055	0.7038	0.8707	0.8359	0.8489	0.9063	1.1403	0.659	0.7109	0.6834	0.7831	0.9183	1.2139	0.7619	1.0021	0.8801	0.9099	0.9634	1.2559	0.7081	0.9911	0.7134	0.8779	0.5044	1.2324	0.7633	0.9106	0.9042	0.9144	0.9691	1.1655	0.641	0.9003	0.7206	0.8418	0.939	1.1941	0.715	0.8952	0.8978
85199s	0.9986	1.0123	1.0386	1.0776	0.7319	0.8674	0.959	0.9681	1.0316	1.0553	0.7042	0.8713	0.8347	0.845	0.9019	1.1445	0.6569	0.7048	0.6828	0.7827	0.911	1.2115	0.7586	0.9994	0.8789	0.9067	0.9612	1.2541	0.7063	0.9794	0.7178	0.8776	0.5036	1.2345	0.7601	0.9087	0.9006	0.9126	0.9657	1.1643	0.6389	0.897	0.7204	0.8389	0.9374	1.196	0.7127	0.8935	0.9014
85799s	0.9996	1.0081	1.0367	1.0743	0.7314	0.8671	0.9589	0.9683	1.0319	1.0546	0.7027	0.8711	0.8343	0.8402	0.8988	1.1412	0.655	0.701	0.682	0.7823	0.9048	1.2089	0.7571	0.9919	0.879	0.9077	0.9588	1.2495	0.7044	0.9743	0.7186	0.8771	0.5027	1.234	0.7581	0.9065	0.8974	0.9074	0.9632	1.1523	0.6369	0.8995	0.7192	0.8359	0.934	1.1954	0.7114	0.8917	0.9004
Date of measurement: 2019-02-14/Time of measurement: 10:10:43
cinetique 37C zb 24h.mth
14022019-001.wsp
[truncated: 23 more columns]

## Sheet: Feuil1
		WT	WT	WT	recF	recF	recF	recB	recB	recB	WT pDIJ	WT pDIJ	WT pDIJ	recF pDIJ	recF pDIJ	recF pDIJ	recB pDIJ	recB pDIJ	recB pDIJ	WT	WT	WT	recF	recF	recF	recB	recB	recB	WT pDIJ	WT pDIJ	WT pDIJ	recF pDIJ	recF pDIJ	recF pDIJ	recB pDIJ	recB pDIJ	recB pDIJ	WT TOB	WT TOB	WT TOB	recF TOB	recF TOB	recF TOB	recB TOB	recB TOB	recB TOB	WT pDIJ TOB	WT pDIJ TOB	WT pDIJ TOB
0	0s	0.0881	0.0882	0.0875	0.0882	0.0879	0.0893	0.0878	0.0882	0.0885	0.0884	0.0882	0.09	0.088	0.0898	0.0881	0.0883	0.0883	0.087	0.0873	0.0867	0.0887	0.0883	0.0885	0.0866	0.0878	0.0902	0.0881	0.0877	0.088	0.0881	0.087	0.09	0.0911	0.0903	0.0949	0.0943	0.087	0.0876	0.0878	0.0892	0.0882	0.0884	0.0892	0.0899	0.0889	0.089	0.0906	0.0892
10	600s	0.0886	0.0889	0.088	0.0885	0.088	0.089	0.0881	0.0886	0.0888	0.0884	0.0883	0.09	0.0884	0.0897	0.0887	0.0907	0.0892	0.0881	0.0882	0.0882	0.0893	0.0893	0.0901	0.0871	0.0883	0.091	0.0888	0.089	0.0881	0.0883	0.0873	0.0907	0.0912	0.0907	0.0948	0.0942	0.088	0.0879	0.0882	0.0893	0.0885	0.0889	0.0892	0.09	0.0895	0.0893	0.0907	0.0898
20	1200s	0.0887	0.089	0.0881	0.0885	0.0881	0.089	0.0881	0.0888	0.0888	0.0885	0.0886	0.0903	0.0887	0.0898	0.0889	0.0913	0.0892	0.0883	0.0879	0.0883	0.0894	0.0892	0.0904	0.0871	0.0885	0.0913	0.0887	0.0896	0.0882	0.0887	0.0875	0.0907	0.0908	0.091	0.0945	0.0941	0.0882	0.088	0.0883	0.0893	0.0886	0.0888	0.0892	0.0901	0.0896	0.0894	0.0907	0.0899
30	1800s	0.0889	0.0891	0.0883	0.0888	0.0883	0.0891	0.0884	0.0888	0.089	0.0887	0.0886	0.0906	0.089	0.0901	0.0895	0.0914	0.0893	0.0884	0.088	0.0884	0.0894	0.0893	0.0906	0.0872	0.0887	0.0914	0.0889	0.0901	0.0884	0.0892	0.0874	0.0908	0.0908	0.0913	0.0948	0.094	0.0883	0.0882	0.0884	0.0895	0.0888	0.0891	0.0894	0.0902	0.0898	0.0896	0.0908	0.0901
40	2400s	0.0892	0.0895	0.0887	0.0891	0.0886	0.0895	0.0887	0.0891	0.0894	0.0889	0.089	0.0911	0.0889	0.0904	0.0895	0.0898	0.0894	0.0888	0.0882	0.0888	0.0897	0.0895	0.0911	0.0873	0.0891	0.0919	0.0892	0.0905	0.089	0.0897	0.0874	0.091	0.0911	0.0915	0.0947	0.0939	0.0888	0.0883	0.0889	0.0898	0.0891	0.0894	0.0896	0.0905	0.0901	0.0901	0.0911	0.0906
50	3000s	0.0898	0.0899	0.0894	0.0898	0.0891	0.0902	0.0888	0.0895	0.09	0.0892	0.0897	0.0916	0.089	0.0906	0.0897	0.0887	0.0898	0.0891	0.0888	0.0895	0.0902	0.09	0.0917	0.0875	0.0899	0.0924	0.0898	0.0913	0.0897	0.0907	0.0877	0.0914	0.0913	0.0923	0.0951	0.0947	0.0893	0.0889	0.0894	0.0903	0.0896	0.0899	0.0899	0.0909	0.0905	0.0907	0.0918	0.0912
60	3600s	0.0906	0.0907	0.0902	0.0906	0.0898	0.091	0.0895	0.0902	0.0908	0.09	0.0905	0.0923	0.0893	0.0911	0.0899	0.089	0.0909	0.0896	0.0897	0.0903	0.0909	0.0909	0.0925	0.0878	0.0908	0.0931	0.0906	0.0922	0.0906	0.0918	0.0882	0.0919	0.0916	0.0931	0.096	0.0952	0.09	0.0895	0.0901	0.0909	0.0902	0.0906	0.0905	0.0915	0.0913	0.0916	0.0926	0.0921
70	4200s	0.0917	0.0918	0.0914	0.0919	0.0909	0.0923	0.0907	0.0911	0.0919	0.0913	0.0918	0.0936	0.0898	0.0915	0.0905	0.0897	0.0914	0.0902	0.0909	0.0915	0.0921	0.092	0.0937	0.0883	0.0921	0.0941	0.0918	0.0936	0.0922	0.0937	0.0888	0.0927	0.0924	0.0939	0.0971	0.096	0.0909	0.0904	0.091	0.0919	0.0911	0.0917	0.0914	0.0923	0.0922	0.0927	0.094	0.0934
80	4800s	0.0934	0.0935	0.0932	0.0936	0.0925	0.0942	0.0923	0.0924	0.0937	0.0931	0.0938	0.0955	0.0906	0.0923	0.0912	0.0906	0.0922	0.0911	0.0928	0.0933	0.0936	0.0936	0.0953	0.0888	0.0938	0.0955	0.0934	0.0957	0.0943	0.0958	0.0898	0.0935	0.0932	0.0954	0.0987	0.0972	0.0925	0.0918	0.0926	0.0934	0.0923	0.0932	0.0925	0.0936	0.0938	0.0945	0.0959	0.0956
90	5400s	0.0957	0.0958	0.0955	0.096	0.0945	0.0968	0.0944	0.0943	0.0958	0.0958	0.0965	0.0985	0.0915	0.0932	0.0924	0.0919	0.0935	0.0925	0.0953	0.0956	0.0959	0.096	0.0973	0.0895	0.0958	0.0973	0.0954	0.099	0.0978	0.0994	0.0912	0.0949	0.0944	0.0973	0.1005	0.0993	0.0943	0.0936	0.0945	0.0954	0.0941	0.0951	0.0942	0.0953	0.0955	0.0972	0.0988	0.0985
100	6000s	0.0987	0.0989	0.0987	0.0992	0.0974	0.1002	0.0972	0.0967	0.0986	0.0992	0.0999	0.1022	0.0928	0.0943	0.0935	0.0935	0.095	0.0941	0.0986	0.0984	0.0988	0.099	0.0998	0.0904	0.0988	0.0994	0.0982	0.1035	0.1021	0.1038	0.0929	0.0965	0.096	0.1	0.1029	0.1019	0.0971	0.0961	0.0971	0.0982	0.0965	0.0977	0.0965	0.0972	0.098	0.1007	0.1026	0.1023
110	6600s	0.1028	0.1031	0.1029	0.1035	0.1012	0.1048	0.101	0.1001	0.1025	0.1043	0.1052	0.1077	0.0945	0.0962	0.0955	0.0958	0.0972	0.0965	0.1032	0.1024	0.1027	0.1031	0.1032	0.0917	0.1025	0.1023	0.1019	0.1103	0.1082	0.1103	0.0953	0.0987	0.0982	0.1031	0.106	0.1052	0.1007	0.0993	0.1008	0.1017	0.0995	0.1013	0.0994	0.1	0.1012	0.1055	0.1076	0.1076
120	7200s	0.108	0.1086	0.1084	0.109	0.1062	0.1109	0.1059	0.1043	0.1073	0.1107	0.1117	0.1148	0.0966	0.0984	0.0979	0.0988	0.1	0.0996	0.1091	0.1078	0.1077	0.1085	0.108	0.0934	0.1073	0.1064	0.1066	0.1179	0.1171	0.1176	0.0982	0.1019	0.1008	0.1072	0.1112	0.1092	0.1054	0.1034	0.1055	0.1067	0.1036	0.106	0.1031	0.1035	0.1052	0.1117	0.1142	0.1143
130	7800s	0.1154	0.1158	0.1158	0.1165	0.1128	0.1184	0.1125	0.1097	0.1136	0.1197	0.1206	0.1246	0.1001	0.1016	0.1015	0.1031	0.1041	0.1039	0.117	0.1146	0.1145	0.1162	0.1142	0.0958	0.1142	0.1117	0.1129	0.1299	0.1279	0.1288	0.1027	0.1062	0.105	0.1131	0.1167	0.1153	0.1114	0.1091	0.1118	0.1129	0.1092	0.1124	0.108	0.1082	0.1107	0.1205	0.1233	0.1239
140	8400s	0.1237	0.1239	0.1241	0.124	0.1209	0.126	0.1201	0.1167	0.1217	0.1269	0.1282	0.133	0.1043	0.1057	0.1059	0.1086	0.1092	0.1093	0.1241	0.1228	0.1228	0.124	0.1221	0.099	0.1221	0.1184	0.1209	0.1406	0.1392	0.1396	0.108	0.1116	0.1101	0.1197	0.1243	0.1216	0.1197	0.1166	0.1198	0.1209	0.1164	0.1202	0.1147	0.1141	0.1177	0.1278	0.1314	0.1315
150	9000s	0.1304	0.1309	0.1307	0.1306	0.1277	0.133	0.1265	0.1249	0.1286	0.1358	0.1371	0.1431	0.1103	0.1117	0.1124	0.1156	0.1166	0.1167	0.1318	0.1296	0.1301	0.1307	0.1298	0.1036	0.1293	0.1268	0.1287	0.1538	0.1519	0.1527	0.1156	0.1188	0.1173	0.1283	0.134	0.1308	0.1263	0.1238	0.1272	0.1273	0.1241	0.1277	0.1223	0.1219	0.1257	0.1356	0.1402	0.1401
160	9600s	0.1404	0.1414	0.1413	0.1404	0.1358	0.1434	0.135	0.1313	0.1366	0.1471	0.1485	0.1555	0.1173	0.1188	0.1197	0.1226	0.1243	0.1244	0.1434	0.1397	0.1399	0.1405	0.1367	0.1096	0.1375	0.1334	0.1362	0.1704	0.1675	0.1692	0.123	0.127	0.126	0.1351	0.1425	0.1398	0.1342	0.1309	0.1349	0.135	0.1306	0.1345	0.1286	0.1288	0.132	0.1464	0.1521	0.1515
170	10200s	0.1518	0.153	0.1528	0.1516	0.1476	0.155	0.146	0.1418	0.148	0.1593	0.1606	0.1707	0.1244	0.1263	0.1275	0.129	0.1315	0.1317	0.1556	0.1516	0.1519	0.1518	0.1481	0.1175	0.1488	0.143	0.1477	0.1884	0.1863	0.1868	0.1295	0.1354	0.1333	0.143	0.1532	0.1474	0.1457	0.1418	0.1465	0.146	0.1401	0.145	0.1374	0.1365	0.1416	0.1581	0.165	0.1639
180	10800s	0.1658	0.167	0.1668	0.1653	0.1595	0.1689	0.1578	0.1526	0.1593	0.1745	0.1756	0.1871	0.131	0.133	0.1343	0.1374	0.139	0.1392	0.1711	0.1657	0.1658	0.1651	0.1592	0.1246	0.1603	0.1539	0.1586	0.2101	0.2049	0.2077	0.138	0.1434	0.1408	0.1537	0.1634	0.1584	0.1573	0.1531	0.1585	0.1573	0.1511	0.157	0.1482	0.1477	0.1524	0.1722	0.1809	0.179
190	11400s	0.1838	0.1853	0.1849	0.1825	0.1748	0.1865	0.173	0.1659	0.1742	0.1948	0.1951	0.2104	0.1413	0.1427	0.1449	0.1489	0.1501	0.1508	0.1909	0.1837	0.184	0.1822	0.1738	0.1327	0.1755	0.1664	0.1736	0.2395	0.2318	0.2343	0.15	0.1553	0.1524	0.1671	0.1807	0.1731	0.1727	0.1671	0.1734	0.1719	0.1642	0.1709	0.1603	0.1591	0.165	0.1914	0.2021	0.1985
200	12000s	0.205	0.2073	0.2068	0.2022	0.1935	0.2073	0.1911	0.1825	0.1922	0.2149	0.2159	0.2334	0.1536	0.1558	0.1581	0.1614	0.1636	0.164	0.2122	0.2057	0.206	0.2018	0.1917	0.1445	0.1941	0.1822	0.1921	0.2681	0.259	0.2633	0.1637	0.1696	0.1669	0.1808	0.197	0.1912	0.1919	0.1851	0.1925	0.1895	0.1803	0.1882	0.1755	0.1729	0.1807	0.2109	0.2231	0.2191
210	12600s	0.2275	0.2291	0.229	0.2235	0.2145	0.2287	0.2112	0.2024	0.213	0.2405	0.2404	0.2627	0.1669	0.1693	0.1723	0.1764	0.1779	0.1786	0.2355	0.229	0.2288	0.224	0.213	0.1566	0.2153	0.2018	0.2131	0.3041	0.291	0.297	0.1796	0.1867	0.1831	0.1997	0.216	0.2116	0.2144	0.2063	0.2143	0.2106	0.1994	0.2085	0.1939	0.1906	0.1996	0.2348	0.251	0.2443
220	13200s	0.2517	0.2537	0.2538	0.2468	0.237	0.2527	0.2328	0.223	0.2344	0.2682	0.2685	0.2956	0.1843	0.187	0.1904	0.1951	0.1968	0.1979	0.2614	0.2522	0.251	0.2466	0.2358	0.172	0.2382	0.2238	0.2352	0.3424	0.3264	0.3321	0.2005	0.2091	0.2047	0.2214	0.2402	0.237	0.2364	0.2287	0.2381	0.2316	0.2209	0.2307	0.2139	0.2117	0.2203	0.2613	0.2843	0.2742
230	13800s	0.282	0.2843	0.284	0.2751	0.2622	0.2818	0.257	0.2454	0.2584	0.2975	0.2968	0.3321	0.2047	0.2079	0.213	0.2166	0.2187	0.2215	0.2913	0.2832	0.2812	0.2738	0.2589	0.1912	0.2615	0.2469	0.2572	0.3823	0.3631	0.368	0.2239	0.2361	0.2304	0.2482	0.2673	0.2646	0.2617	0.2532	0.2635	0.2552	0.244	0.2547	0.2352	0.2334	0.2429	0.2884	0.3157	0.3034
240	14400s	0.3088	0.3113	0.3104	0.3001	0.2921	0.3066	0.2871	0.2717	0.2875	0.3314	0.3239	0.3654	0.2291	0.2317	0.2373	0.2422	0.2435	0.2475	0.3107	0.3072	0.3054	0.3004	0.2904	0.2125	0.2938	0.2701	0.2896	0.4226	0.4009	0.4049	0.2504	0.2658	0.264	0.2792	0.2983	0.2986	0.2924	0.2824	0.2937	0.2845	0.2698	0.282	0.2595	0.2569	0.2677	0.3181	0.3485	0.3355
250	15000s	0.3347	0.3331	0.3391	0.3297	0.3145	0.3348	0.3119	0.2988	0.3112	0.3585	0.3527	0.3964	0.2568	0.2596	0.2664	0.2698	0.2708	0.2792	0.3314	0.3285	0.3305	0.3231	0.3117	0.2347	0.3138	0.3028	0.3112	0.4609	0.4343	0.4383	0.2778	0.298	0.2983	0.3074	0.3293	0.3308	0.3179	0.3081	0.3187	0.3096	0.2991	0.3084	0.2897	0.2856	0.2981	0.3483	0.3795	0.3641
260	15600s	0.3519	0.3494	0.3543	0.3455	0.3344	0.3522	0.335	0.3246	0.3387	0.3728	0.3675	0.4187	0.2811	0.2833	0.2919	0.2924	0.2971	0.3097	0.3519	0.3431	0.3458	0.3421	0.3344	0.2578	0.3382	0.3214	0.3376	0.487	0.4622	0.4636	0.2987	0.3287	0.329	0.3313	0.3614	0.3646	0.3419	0.3357	0.3472	0.335	0.3232	0.3347	0.3124	0.3098	0.3207	0.3691	0.4049	0.389
270	16200s	0.3788	0.3771	0.3822	0.3777	0.3599	0.3812	0.3574	0.3445	0.3559	0.3933	0.3887	0.4438	0.3044	0.3065	0.3149	0.3128	0.3143	0.3295	0.3733	0.3681	0.365	0.3634	0.35	0.2895	0.3547	0.3444	0.3538	0.5162	0.4866	0.4848	0.3192	0.3536	0.3542	0.3591	0.3841	0.3878	0.3598	0.354	0.3664	0.3522	0.3449	0.3558	0.3395	0.3385	0.3484	0.3876	0.4266	0.4052
280	16800s	0.3985	0.3979	0.4108	0.4012	0.3838	0.409	0.3845	0.3674	0.3825	0.428	0.4222	0.4832	0.3272	0.3293	0.3382	0.3369	0.3391	0.3569	0.3904	0.4005	0.3867	0.3812	0.3784	0.3131	0.3748	0.3685	0.3785	0.5558	0.5283	0.5185	0.3438	0.3809	0.38	0.3837	0.4107	0.416	0.3897	0.379	0.398	0.3775	0.365	0.3826	0.3551	0.3585	0.3692	0.4213	0.4671	0.4431
290	17400s	0.4165	0.4184	0.4336	0.4225	0.4084	0.433	0.4095	0.3936	0.4106	0.4562	0.4483	0.5146	0.3534	0.3552	0.3635	0.355	0.3568	0.3754	0.4137	0.4271	0.4094	0.4038	0.4051	0.3412	0.4003	0.398	0.4019	0.5873	0.5618	0.5508	0.3702	0.4079	0.4051	0.411	0.432	0.4392	0.417	0.4083	0.4286	0.4044	0.3944	0.416	0.3837	0.3805	0.3997	0.4477	0.4971	0.4717
300	18000s	0.4322	0.4356	0.4498	0.4404	0.426	0.4517	0.4296	0.4162	0.4332	0.4876	0.4784	0.5488	0.3782	0.3787	0.3882	0.3819	0.3784	0.4008	0.4324	0.4608	0.4294	0.4273	0.4321	0.3544	0.4291	0.4278	0.4315	0.6244	0.5984	0.5832	0.3909	0.4325	0.4308	0.4379	0.4614	0.4664	0.4408	0.4363	0.4574	0.4294	0.4206	0.4446	0.411	0.4092	0.429	0.4771	0.5321	0.5051
310	18600s	0.4462	0.4503	0.4652	0.4567	0.443	0.4712	0.4494	0.437	0.4578	0.517	0.5084	0.5809	0.3986	0.3985	0.4094	0.4091	0.4033	0.4274	0.4453	0.4868	0.4439	0.4453	0.4598	0.3728	0.4572	0.457	0.4572	0.656	0.6309	0.6144	0.4153	0.4518	0.4494	0.468	0.4919	0.4956	0.4599	0.4596	0.4786	0.454	0.4452	0.4696	0.4385	0.4356	0.4571	0.5087	0.5619	0.5337
320	19200s	0.4579	0.465	0.4804	0.4714	0.4586	0.4904	0.4676	0.4575	0.4818	0.552	0.547	0.6144	0.4229	0.4222	0.434	0.4354	0.4321	0.4531	0.4555	0.5098	0.4604	0.4605	0.4906	0.3979	0.4801	0.4912	0.4818	0.6853	0.6635	0.6453	0.4393	0.4733	0.4734	0.4998	0.5173	0.5236	0.4788	0.4788	0.4977	0.4745	0.4666	0.4918	0.4632	0.4622	0.4819	0.5485	0.5983	0.5743
330	19800s	0.4697	0.4767	0.4923	0.4867	0.4735	0.5057	0.4857	0.4746	0.5006	0.5766	0.5708	0.6373	0.4456	0.4444	0.4567	0.4608	0.4511	0.473	0.4624	0.52	0.4655	0.4724	0.5068	0.4176	0.4942	0.5141	0.4958	0.7107	0.6906	0.6733	0.4607	0.4896	0.4909	0.5272	0.5398	0.5459	0.4926	0.4956	0.5151	0.4925	0.4861	0.5138	0.4842	0.4847	0.5074	0.573	0.6238	0.6002
340	20400s	0.4819	0.4881	0.5085	0.5044	0.4879	0.5263	0.5064	0.4938	0.5238	0.6149	0.6151	0.6778	0.4692	0.4669	0.4803	0.4896	0.4824	0.4997	0.4806	0.5506	0.4918	0.4912	0.5338	0.4429	0.5175	0.5451	0.5191	0.7511	0.7328	0.7048	0.4848	0.5118	0.5167	0.5572	0.5702	0.5809	0.5085	0.5108	0.5317	0.5099	0.5061	0.5325	0.5055	0.5115	0.5282	0.6202	0.6676	0.6518
350	21000s	0.4944	0.4993	0.5194	0.5199	0.5014	0.542	0.5242	0.51	0.5424	0.6427	0.6467	0.7054	0.4902	0.4883	0.5019	0.5156	0.5083	0.5259	0.4937	0.5607	0.5051	0.5055	0.5463	0.4579	0.5342	0.5621	0.5355	0.7803	0.7639	0.7348	0.507	0.5298	0.5333	0.5858	0.5954	0.6059	0.5236	0.5269	0.5476	0.53	0.5269	0.5545	0.5275	0.5348	0.5525	0.6532	0.699	0.6862
360	21600s	0.5117	0.5138	0.5335	0.5378	0.5151	0.5596	0.5434	0.5263	0.5626	0.6714	0.6768	0.7395	0.5102	0.509	0.5233	0.5421	0.5366	0.5542	0.5086	0.581	0.5169	0.5226	0.5681	0.4722	0.5527	0.5832	0.5546	0.8077	0.7994	0.7627	0.5268	0.5484	0.5533	0.6133	0.6216	0.6383	0.5382	0.5433	0.5623	0.5475	0.5464	0.5732	0.5485	0.5586	0.5741	0.6865	0.7334	0.7223
370	22200s	0.5416	0.5365	0.5506	0.5632	0.5378	0.5823	0.5644	0.5469	0.5842	0.6997	0.7019	0.7662	0.5291	0.5286	0.544	0.5686	0.5618	0.5828	0.5365	0.5692	0.5132	0.5463	0.5848	0.4863	0.5667	0.6008	0.5725	0.8335	0.8276	0.7887	0.5441	0.5674	0.5721	0.6388	0.6468	0.6661	0.5556	0.559	0.5789	0.5659	0.5672	0.5944	0.5703	0.5824	0.5976	0.7156	0.7628	0.7523
380	22800s	0.5673	0.5713	0.5888	0.5961	0.5611	0.617	0.5986	0.5645	0.6055	0.7365	0.7343	0.8063	0.5472	0.5468	0.5636	0.5956	0.5897	0.6119	0.5493	0.5626	0.5196	0.5723	0.6184	0.5019	0.6028	0.6151	0.599	0.8595	0.8627	0.8145	0.563	0.5858	0.5906	0.6658	0.672	0.6974	0.5781	0.5789	0.598	0.5906	0.5882	0.6159	0.5931	0.6042	0.6221	0.7545	0.8006	0.7857
390	23400s	0.5838	0.5897	0.6086	0.6171	0.5876	0.6361	0.625	0.6069	0.6433	0.768	0.77	0.8356	0.5649	0.5643	0.5825	0.6225	0.6159	0.6405	0.5558	0.5546	0.5163	0.5868	0.6156	0.5196	0.6178	0.6589	0.624	0.8928	0.8986	0.8433	0.5801	0.6038	0.6091	0.6913	0.6988	0.7243	0.6122	0.6092	0.6294	0.6234	0.6078	0.6384	0.6209	0.6233	0.6447	0.786	0.8352	0.8229
400	24000s	0.5925	0.5992	0.6206	0.6343	0.6031	0.655	0.6456	0.6225	0.6636	0.787	0.7857	0.8544	0.5806	0.5807	0.5998	0.6461	0.6374	0.667	0.5515	0.5451	0.5152	0.5963	0.617	0.5243	0.6347	0.6632	0.634	0.9177	0.9222	0.8751	0.5946	0.62	0.6247	0.714	0.722	0.7498	0.6312	0.6342	0.6548	0.6454	0.642	0.6731	0.6558	0.6608	0.6761	0.8027	0.8564	0.8448
410	24600s	0.6003	0.6061	0.6284	0.6482	0.6205	0.6648	0.6595	0.6422	0.6772	0.8062	0.8014	0.8715	0.596	0.5963	0.6165	0.6699	0.6583	0.6928	0.5715	0.5468	0.5184	0.6121	0.6232	0.5522	0.6484	0.682	0.6493	0.9311	0.9399	0.8981	0.6101	0.6366	0.6356	0.7382	0.7447	0.7707	0.6413	0.6487	0.6701	0.657	0.6613	0.6921	0.6719	0.6832	0.7005	0.8204	0.8775	0.8651
420	25200s	0.6088	0.6151	0.6358	0.6588	0.6308	0.6725	0.6686	0.6536	0.6872	0.8269	0.8252	0.8969	0.6112	0.6113	0.6321	0.6948	0.6862	0.7229	0.5861	0.5537	0.5264	0.6248	0.6353	0.5581	0.662	0.7034	0.6611	0.952	0.9662	0.9203	0.6241	0.653	0.6529	0.7599	0.7692	0.7953	0.6499	0.6586	0.6805	0.6671	0.6752	0.7047	0.682	0.6947	0.7123	0.8449	0.9061	0.8901
430	25800s	0.6156	0.6223	0.6424	0.6677	0.6391	0.6812	0.6791	0.6621	0.6967	0.8441	0.84	0.9113	0.6245	0.6246	0.6477	0.7183	0.7132	0.7493	0.5929	0.5569	0.5317	0.6349	0.6475	0.5645	0.6732	0.7175	0.6708	0.965	0.9794	0.9396	0.6383	0.6677	0.6639	0.7828	0.7947	0.8147	0.6582	0.6675	0.6893	0.6729	0.6836	0.7131	0.6908	0.7064	0.7244	0.8608	0.9206	0.9059
440	26400s	0.6221	0.629	0.6489	0.6723	0.6456	0.687	0.6867	0.6695	0.7052	0.861	0.8558	0.9304	0.6359	0.638	0.6613	0.7322	0.7371	0.7685	0.6091	0.5623	0.5364	0.6425	0.656	0.5782	0.6836	0.7351	0.6843	0.9879	1.0028	0.9581	0.6486	0.6832	0.6806	0.7944	0.816	0.8465	0.6686	0.6782	0.6995	0.6809	0.692	0.7213	0.7005	0.7175	0.7331	0.8779	0.9406	0.9243
450	27000s	0.6287	0.6347	0.6569	0.6815	0.6523	0.6949	0.6958	0.6772	0.7163	0.8789	0.8715	0.9494	0.6491	0.6499	0.6756	0.7467	0.7537	0.7872	0.6252	0.5685	0.5431	0.6527	0.6696	0.5956	0.694	0.7535	0.6966	0.9989	1.0178	0.9734	0.6603	0.6961	0.6919	0.8093	0.8278	0.8683	0.6762	0.6859	0.7084	0.6885	0.6983	0.7286	0.7125	0.7306	0.7452	0.8963	0.963	0.9435
460	27600s	0.6346	0.6406	0.6626	0.6885	0.6582	0.7011	0.7041	0.6845	0.7257	0.8929	0.8822	0.9655	0.6594	0.6618	0.688	0.758	0.7668	0.8032	0.626	0.5742	0.5484	0.6596	0.6782	0.6032	0.7021	0.7714	0.7095	1.0146	1.0341	0.9899	0.6694	0.7091	0.7038	0.8209	0.8409	0.8841	0.6861	0.6959	0.7197	0.6976	0.7053	0.7394	0.7238	0.7426	0.7584	0.9083	0.9904	0.9598
470	28200s	0.64	0.6456	0.669	0.6967	0.6643	0.7064	0.7138	0.6906	0.7353	0.9035	0.8913	0.9774	0.6698	0.6712	0.6996	0.7698	0.7766	0.8157	0.6383	0.5793	0.5537	0.6676	0.6827	0.6076	0.7101	0.7841	0.7166	1.0216	1.0452	1.0028	0.6799	0.7209	0.7126	0.8371	0.85	0.8987	0.694	0.7027	0.7287	0.7043	0.7118	0.7471	0.732	0.7555	0.7687	0.919	1.0003	0.9708
480	28800s	0.6434	0.6492	0.6734	0.6986	0.6694	0.7103	0.7181	0.6976	0.7456	0.9142	0.9066	0.9941	0.6785	0.681	0.7101	0.779	0.7896	0.832	0.6554	0.5863	0.5614	0.6743	0.6957	0.6168	0.7184	0.7992	0.731	1.036	1.0582	1.0177	0.6882	0.7333	0.7256	0.8461	0.8614	0.9142	0.7018	0.7115	0.7377	0.7125	0.7192	0.7546	0.7435	0.7707	0.7799	0.9333	1.0181	0.9815
490	29400s	0.6477	0.6526	0.677	0.7074	0.674	0.7151	0.7271	0.7036	0.7568	0.9295	0.922	1.0072	0.6884	0.6902	0.7207	0.7895	0.8031	0.8468	0.6686	0.5913	0.5664	0.6825	0.7044	0.6245	0.7269	0.812	0.7433	1.0494	1.0729	1.0307	0.6963	0.7456	0.7393	0.8547	0.8727	0.9271	0.7077	0.7195	0.7469	0.7183	0.7255	0.7634	0.7522	0.7831	0.7927	0.9504	1.037	1.0006
500	30000s	0.6504	0.6558	0.6814	0.7098	0.6776	0.7211	0.7309	0.7085	0.7672	0.9406	0.933	1.0219	0.6948	0.6989	0.7316	0.7969	0.8117	0.8584	0.6736	0.5935	0.5694	0.6882	0.708	0.6271	0.7327	0.8253	0.7517	1.0599	1.0853	1.0401	0.7026	0.7546	0.7485	0.8632	0.88	0.9419	0.7139	0.7266	0.7528	0.7241	0.7299	0.7705	0.7598	0.794	0.804	0.9663	1.0483	1.0136
510	30600s	0.6549	0.6606	0.6831	0.7177	0.6835	0.7275	0.7383	0.717	0.776	0.95	0.9439	1.0307	0.7028	0.7078	0.7404	0.8051	0.8215	0.8708	0.6828	0.5966	0.5733	0.695	0.7148	0.6346	0.7401	0.8369	0.7618	1.0703	1.0997	1.0544	0.7096	0.7654	0.7602	0.862	0.8896	0.9512	0.7207	0.7325	0.7607	0.7315	0.7354	0.7786	0.7684	0.8034	0.8135	0.978	1.0614	1.026
520	31200s	0.6587	0.664	0.6864	0.722	0.6878	0.7337	0.7437	0.721	0.7837	0.9592	0.9493	1.0406	0.7092	0.7141	0.7482	0.8118	0.8273	0.8788	0.6861	0.6005	0.5751	0.7007	0.7179	0.6356	0.7458	0.8472	0.7676	1.0779	1.1077	1.0647	0.7138	0.774	0.7674	0.8713	0.8954	0.9639	0.7267	0.7384	0.7662	0.7386	0.7416	0.7869	0.7772	0.814	0.8224	0.986	1.0748	1.0351
530	31800s	0.6623	0.6674	0.6903	0.7262	0.6929	0.7396	0.7495	0.7269	0.7912	0.9665	0.9581	1.0573	0.7147	0.72	0.7558	0.8178	0.8341	0.8899	0.6949	0.6045	0.577	0.7058	0.7245	0.6412	0.752	0.8576	0.7767	1.0858	1.1168	1.075	0.718	0.7838	0.7782	0.872	0.9052	0.9765	0.7321	0.7433	0.7708	0.7453	0.7475	0.7933	0.7842	0.8229	0.8305	0.9952	1.0871	1.0433
540	32400s	0.6674	0.6708	0.6942	0.7323	0.6978	0.7467	0.756	0.7336	0.8	0.9792	0.9692	1.0771	0.7207	0.7271	0.7642	0.8234	0.8443	0.9041	0.7012	0.6078	0.5811	0.7119	0.7291	0.6458	0.7585	0.8678	0.7857	1.0923	1.126	1.0865	0.7233	0.7897	0.7854	0.871	0.9111	0.9858	0.7358	0.7478	0.7742	0.7517	0.7532	0.802	0.7939	0.8329	0.8402	1.008	1.1035	1.0573
550	33000s	0.6716	0.6735	0.6968	0.7378	0.7022	0.7513	0.7608	0.7372	0.8043	0.9838	0.9733	1.0831	0.7251	0.7316	0.7702	0.8282	0.8461	0.9113	0.7005	0.6111	0.5831	0.7159	0.7307	0.6473	0.7639	0.8811	0.7908	1.098	1.1325	1.0936	0.7271	0.7962	0.7897	0.8762	0.9154	0.9945	0.7394	0.7509	0.7787	0.7578	0.7584	0.8085	0.8001	0.8407	0.8473	1.0119	1.1061	1.0619
560	33600s	0.6765	0.6768	0.7003	0.7443	0.7067	0.7564	0.7682	0.7437	0.8097	0.9895	0.9827	1.0926	0.7299	0.737	0.7756	0.8334	0.8515	0.9265	0.7106	0.6166	0.5867	0.7216	0.7362	0.6528	0.7706	0.8943	0.8006	1.1047	1.1442	1.1029	0.7316	0.8039	0.7944	0.8709	0.922	1.0024	0.7433	0.7581	0.784	0.7648	0.765	0.8157	0.8075	0.8496	0.8555	1.0204	1.1247	1.0714
570	34200s	0.6815	0.6808	0.7051	0.7496	0.7113	0.7625	0.7735	0.7499	0.8158	1.0009	0.994	1.1071	0.7337	0.742	0.7819	0.8371	0.8593	0.9389	0.7175	0.622	0.5898	0.7263	0.7389	0.6579	0.7766	0.9041	0.809	1.111	1.1562	1.1154	0.7342	0.8102	0.8023	0.8712	0.9268	1.0082	0.7459	0.7619	0.7885	0.7704	0.7719	0.8218	0.8168	0.8607	0.8617	1.0329	1.1382	1.0835
580	34800s	0.6878	0.6839	0.7113	0.7562	0.7149	0.7685	0.7792	0.7568	0.8251	1.0067	1.0038	1.1216	0.7383	0.7464	0.788	0.8422	0.8661	0.9549	0.7276	0.6287	0.593	0.7312	0.7453	0.6621	0.7824	0.9165	0.8175	1.1206	1.1683	1.1265	0.7383	0.8178	0.8129	0.8737	0.9353	1.0184	0.7485	0.7679	0.7933	0.7758	0.7777	0.8283	0.8227	0.8711	0.8697	1.0443	1.1517	1.0969
590	35400s	0.6951	0.6866	0.7165	0.7619	0.7189	0.772	0.7856	0.7626	0.8321	1.0204	1.0131	1.1319	0.742	0.7507	0.7917	0.846	0.8714	0.9646	0.7358	0.6319	0.5957	0.7366	0.7479	0.6665	0.7883	0.927	0.8247	1.1261	1.177	1.135	0.7422	0.8248	0.8176	0.8754	0.9418	1.0238	0.7526	0.7706	0.7982	0.7821	0.7817	0.8344	0.8333	0.8813	0.8774	1.0593	1.1626	1.1117
600	36000s	0.6998	0.6893	0.7204	0.7671	0.7247	0.7789	0.7906	0.7665	0.8333	1.0194	1.0138	1.1379	0.7441	0.7546	0.797	0.8484	0.8722	0.9666	0.7312	0.637	0.5986	0.7392	0.7483	0.6693	0.7913	0.9338	0.8297	1.1283	1.1824	1.1453	0.7431	0.8269	0.8162	0.872	0.9401	1.0279	0.7575	0.7786	0.8035	0.79	0.7871	0.8403	0.8381	0.8854	0.8827	1.056	1.1643	1.1067
610	36600s	0.7053	0.6929	0.7222	0.772	0.7285	0.782	0.7959	0.7725	0.8385	1.0251	1.0231	1.1465	0.7468	0.7581	0.8004	0.8517	0.8766	0.9753	0.7374	0.6401	0.6019	0.744	0.7507	0.6733	0.7971	0.9426	0.8391	1.1323	1.1904	1.1524	0.746	0.8327	0.8246	0.8765	0.9435	1.0304	0.76	0.78	0.8061	0.7952	0.7921	0.845	0.8453	0.8925	0.8879	1.0668	1.1702	1.115
620	37200s	0.711	0.6962	0.7274	0.7774	0.7332	0.7878	0.8	0.7755	0.8424	1.0293	1.0257	1.1495	0.7493	0.7611	0.8045	0.8542	0.8749	0.9777	0.7331	0.6429	0.6044	0.747	0.7523	0.6759	0.8025	0.9492	0.8441	1.1352	1.1956	1.1566	0.7487	0.837	0.8267	0.8748	0.9454	1.0346	0.7631	0.7847	0.8118	0.8018	0.7972	0.8523	0.8514	0.8959	0.8935	1.0699	1.1727	1.1164
630	37800s	0.7163	0.6984	0.7332	0.7821	0.7371	0.7939	0.8051	0.7811	0.8492	1.0337	1.0336	1.158	0.752	0.7641	0.8092	0.8569	0.8791	0.9877	0.7305	0.6464	0.6077	0.7516	0.7583	0.6807	0.8074	0.9514	0.8536	1.1449	1.2031	1.166	0.7509	0.8417	0.8343	0.8778	0.9505	1.0396	0.7645	0.7881	0.8157	0.8056	0.804	0.8582	0.8562	0.9015	0.9003	1.0768	1.182	1.1252
640	38400s	0.7213	0.7002	0.7356	0.7869	0.7412	0.7974	0.8096	0.7851	0.8526	1.0375	1.035	1.1637	0.7549	0.7665	0.8122	0.8585	0.8793	0.9939	0.7337	0.6483	0.6098	0.7556	0.7634	0.6842	0.8119	0.9434	0.8595	1.1475	1.2076	1.1705	0.7532	0.8445	0.8359	0.8794	0.9528	1.0427	0.7678	0.7886	0.817	0.8099	0.8067	0.8612	0.8629	0.9045	0.904	1.0811	1.1901	1.1281
650	39000s	0.7263	0.7019	0.7425	0.7931	0.7453	0.8009	0.8146	0.7901	0.8571	1.0382	1.038	1.168	0.7574	0.7691	0.8141	0.8611	0.8801	1.0011	0.7397	0.6498	0.6119	0.7593	0.7673	0.6879	0.8159	0.9349	0.8658	1.151	1.2126	1.1744	0.7557	0.8477	0.8367	0.88	0.9537	1.0487	0.7716	0.7927	0.8201	0.8142	0.8126	0.8657	0.8686	0.9096	0.9104	1.0804	1.1964	1.1302
660	39600s	0.7326	0.7062	0.7454	0.7966	0.749	0.8035	0.8179	0.7974	0.8642	1.0508	1.0549	1.1831	0.7604	0.7717	0.8167	0.8637	0.8899	1.0167	0.743	0.6522	0.6172	0.7634	0.7723	0.6945	0.8218	0.924	0.878	1.1607	1.2208	1.1843	0.7583	0.8542	0.8485	0.8832	0.9639	1.0534	0.7776	0.7961	0.8246	0.8174	0.8174	0.8692	0.8752	0.9197	0.9155	1.1017	1.2101	1.1502
670	40200s	0.738	0.7095	0.7489	0.8018	0.7534	0.8092	0.8226	0.8013	0.8668	1.0491	1.0525	1.1852	0.7619	0.7735	0.819	0.8655	0.8905	1.0197	0.7463	0.6534	0.6162	0.7666	0.7778	0.698	0.8233	0.908	0.8818	1.1609	1.2241	1.1916	0.7594	0.8561	0.8462	0.8862	0.9596	1.0566	0.781	0.7982	0.8294	0.8214	0.821	0.8738	0.8806	0.9216	0.9207	1.0994	1.2125	1.1456
680	40800s	0.7433	0.7113	0.7518	0.8035	0.7562	0.8122	0.8258	0.8045	0.871	1.0497	1.056	1.1867	0.764	0.7746	0.8211	0.8666	0.8889	1.0232	0.7483	0.6542	0.6159	0.7699	0.7824	0.7006	0.8272	0.8952	0.8877	1.1621	1.2273	1.1922	0.7604	0.8577	0.8483	0.8835	0.9585	1.0585	0.7844	0.8026	0.8327	0.8244	0.8257	0.8777	0.8861	0.9253	0.9258	1.1055	1.2136	1.1489
690	41400s	0.747	0.7156	0.7536	0.807	0.7598	0.8141	0.8292	0.8076	0.8737	1.0498	1.0582	1.1894	0.7652	0.7759	0.8224	0.8684	0.8892	1.0275	0.7517	0.6556	0.6186	0.7736	0.7862	0.7047	0.8301	0.8867	0.8948	1.1648	1.2305	1.1968	0.7619	0.8593	0.8502	0.8843	0.9568	1.0623	0.7891	0.8058	0.8335	0.8271	0.8286	0.8806	0.8908	0.9277	0.9313	1.1072	1.2161	1.15
700	42000s	0.7534	0.7189	0.7612	0.8095	0.7635	0.8199	0.8332	0.8131	0.881	1.0547	1.067	1.1985	0.767	0.778	0.8251	0.87	0.8936	1.0357	0.754	0.658	0.6217	0.7769	0.7914	0.7103	0.8332	0.8803	0.9039	1.1708	1.2349	1.2042	0.7632	0.8619	0.8516	0.8869	0.9615	1.0651	0.7933	0.8089	0.8372	0.8309	0.8327	0.8852	0.898	0.9329	0.938	1.1174	1.2251	1.1616
710	42600s	0.7599	0.7208	0.7645	0.8145	0.7664	0.8233	0.8381	0.8151	0.8849	1.0567	1.0681	1.2022	0.7692	0.7788	0.8269	0.8716	0.8944	1.0382	0.756	0.6585	0.624	0.7804	0.7959	0.7135	0.8364	0.8686	0.9086	1.1723	1.2376	1.2067	0.7651	0.8622	0.8524	0.8869	0.9606	1.0684	0.7959	0.8125	0.8399	0.8335	0.837	0.8877	0.902	0.9366	0.942	1.1191	1.2268	1.1635
720	43200s	0.7659	0.7235	0.7659	0.8189	0.7697	0.8259	0.8435	0.8217	0.8904	1.0606	1.0786	1.2063	0.771	0.7798	0.828	0.8732	0.8992	1.042	0.7563	0.6596	0.6262	0.7834	0.7991	0.7175	0.8391	0.8605	0.9154	1.1759	1.2408	1.2115	0.7657	0.8662	0.8568	0.8905	0.9619	1.0688	0.7992	0.8171	0.8421	0.8369	0.8418	0.8906	0.9105	0.9436	0.947	1.1324	1.2331	1.1742
730	43800s	0.7646	0.7265	0.7685	0.8193	0.7727	0.8285	0.8469	0.8216	0.8933	1.055	1.0704	1.2099	0.771	0.7793	0.8289	0.8742	0.8959	1.0452	0.7578	0.6617	0.6275	0.7841	0.8028	0.7205	0.8417	0.8494	0.9184	1.1759	1.2429	1.2128	0.7656	0.8657	0.8563	0.8899	0.9604	1.0756	0.8022	0.817	0.8444	0.8398	0.8442	0.8945	0.9136	0.9441	0.952	1.1232	1.2355	1.1665
740	44400s	0.767	0.7286	0.7699	0.8209	0.7754	0.83	0.8496	0.8245	0.8969	1.0571	1.0735	1.2097	0.7721	0.7797	0.8295	0.8754	0.8945	1.0477	0.76	0.663	0.6291	0.7866	0.8058	0.7227	0.8437	0.838	0.925	1.1754	1.2448	1.216	0.7664	0.8678	0.8575	0.8896	0.9585	1.075	0.8055	0.8185	0.8489	0.8427	0.8459	0.8987	0.9193	0.9483	0.957	1.1288	1.2367	1.1682
750	45000s	0.7713	0.733	0.7728	0.8251	0.7788	0.8334	0.8539	0.8304	0.9044	1.0635	1.0858	1.2191	0.7736	0.7806	0.8303	0.8775	0.9021	1.0555	0.7614	0.6645	0.6308	0.7902	0.8098	0.7263	0.8485	0.8298	0.9321	1.1815	1.2479	1.2199	0.7669	0.8705	0.8612	0.8926	0.9612	1.0784	0.8096	0.8231	0.8524	0.8464	0.8512	0.9023	0.9254	0.9555	0.9661	1.1438	1.2467	1.1814
760	45600s	0.7729	0.7348	0.7749	0.8279	0.782	0.8371	0.8579	0.8312	0.9071	1.0558	1.0784	1.2194	0.7742	0.7801	0.8311	0.878	0.8986	1.056	0.7618	0.6635	0.6319	0.7918	0.8133	0.7297	0.8487	0.819	0.9323	1.178	1.249	1.222	0.7671	0.869	0.8589	0.8915	0.9586	1.0815	0.8154	0.8264	0.8558	0.8496	0.8528	0.9047	0.9304	0.9563	0.975	1.1366	1.2443	1.1719
770	46200s	0.7738	0.7367	0.775	0.8299	0.785	0.839	0.8601	0.8358	0.9111	1.0567	1.0834	1.2218	0.7744	0.7805	0.831	0.8795	0.8979	1.0582	0.7629	0.6649	0.633	0.7929	0.8158	0.7327	0.8505	0.8124	0.9346	1.1772	1.2499	1.2246	0.7674	0.8711	0.8572	0.8906	0.9595	1.0826	0.8234	0.8313	0.8628	0.8527	0.856	0.9095	0.9393	0.9618	0.9848	1.1401	1.2474	1.1748
780	46800s	0.778	0.7388	0.7766	0.8338	0.7887	0.8408	0.8653	0.8431	0.9158	1.0582	1.0941	1.2256	0.7756	0.7821	0.8311	0.8807	0.904	1.0655	0.7645	0.6659	0.6353	0.7958	0.8185	0.7364	0.8538	0.8067	0.9399	1.1825	1.2533	1.2306	0.7682	0.875	0.8626	0.8924	0.9614	1.0807	0.8276	0.835	0.8677	0.8564	0.8587	0.9158	0.9496	0.9705	0.9923	1.1466	1.2554	1.1862
790	47400s	0.7782	0.7407	0.7803	0.833	0.7912	0.8447	0.8626	0.8446	0.9215	1.0526	1.0923	1.2296	0.7754	0.7808	0.8318	0.881	0.9022	1.0655	0.7645	0.6666	0.6368	0.7955	0.8218	0.7381	0.8561	0.7934	0.9415	1.1815	1.2551	1.2313	0.7667	0.8738	0.8619	0.8919	0.9609	1.0859	0.8308	0.8381	0.8686	0.8606	0.8621	0.9224	0.957	0.9789	0.9958	1.148	1.2565	1.1814
800	48000s	0.7816	0.7412	0.7824	0.8384	0.7927	0.8473	0.8679	0.8475	0.9301	1.0561	1.0907	1.2301	0.7765	0.7801	0.832	0.8825	0.9007	1.0688	0.7655	0.668	0.6373	0.799	0.8247	0.7394	0.8561	0.7844	0.9458	1.1838	1.2562	1.2311	0.7681	0.8742	0.8613	0.8927	0.9628	1.0874	0.8335	0.8381	0.8697	0.8671	0.8638	0.9288	0.9627	0.9862	1.0012	1.1481	1.2577	1.1862
810	48599s	0.7825	0.7438	0.784	0.8403	0.7963	0.8477	0.8721	0.8525	0.9376	1.0532	1.0892	1.2319	0.7768	0.781	0.8313	0.8828	0.9013	1.0693	0.765	0.6683	0.6393	0.8004	0.8276	0.7431	0.8558	0.7707	0.9458	1.185	1.2577	1.2371	0.7677	0.8747	0.8592	0.892	0.9618	1.0891	0.8357	0.8403	0.8704	0.8745	0.8687	0.9327	0.9676	0.9909	1.0054	1.1467	1.259	1.183
820	49199s	0.7833	0.7455	0.7912	0.8404	0.7981	0.8541	0.8774	0.8569	0.9461	1.058	1.0983	1.2369	0.7767	0.7796	0.8322	0.8838	0.9037	1.0762	0.7657	0.6684	0.64	0.8019	0.8309	0.7444	0.8613	0.761	0.9509	1.1901	1.2601	1.237	0.7685	0.8771	0.8632	0.8924	0.9639	1.089	0.8351	0.8404	0.8688	0.8788	0.8732	0.9345	0.9716	0.9972	1.0086	1.1602	1.2661	1.1942
830	49799s	0.7864	0.7475	0.7946	0.843	0.8006	0.8599	0.8847	0.8603	0.9503	1.0553	1.0957	1.24	0.7767	0.7797	0.8312	0.884	0.9034	1.0778	0.7657	0.6689	0.6413	0.8023	0.833	0.7473	0.8596	0.7456	0.9503	1.1887	1.2622	1.2418	0.7676	0.8752	0.8609	0.8921	0.9628	1.0922	0.8368	0.8384	0.8681	0.8827	0.8779	0.937	0.9748	0.9985	1.0128	1.1585	1.2675	1.1884
840	50400s	0.7922	0.7502	0.799	0.8469	0.8028	0.8673	0.8883	0.8629	0.9557	1.0575	1.0891	1.2407	0.7767	0.7789	0.8312	0.8842	0.8969	1.077	0.7657	0.6693	0.6419	0.8035	0.8365	0.7485	0.8611	0.7371	0.9488	1.1834	1.2618	1.2393	0.768	0.8727	0.8532	0.8917	0.9632	1.0927	0.8373	0.8402	0.8693	0.8855	0.8853	0.9399	0.9778	1.0033	1.0177	1.15	1.2683	1.1846
850	50999s	0.7966	0.7541	0.7982	0.853	0.8048	0.8684	0.8898	0.8682	0.9582	1.0607	1.0987	1.2406	0.7768	0.7783	0.8295	0.8853	0.899	1.0781	0.7651	0.6696	0.643	0.8057	0.8373	0.751	0.8593	0.7254	0.952	1.1841	1.2623	1.2415	0.7676	0.8756	0.8578	0.8921	0.9638	1.0911	0.8374	0.8396	0.8675	0.8878	0.8885	0.9412	0.9815	1.0068	1.022	1.1561	1.2704	1.192
860	51599s	0.797	0.7587	0.7978	0.8577	0.8069	0.8698	0.8933	0.8742	0.9609	1.0616	1.0962	1.2378	0.7765	0.7773	0.8284	0.8847	0.8947	1.0748	0.7675	0.6705	0.6439	0.8064	0.8397	0.7523	0.8577	0.716	0.9496	1.1805	1.2619	1.2408	0.7677	0.8755	0.8568	0.8926	0.9629	1.0922	0.8376	0.8395	0.8683	0.8899	0.892	0.9436	0.9834	1.0098	1.0264	1.151	1.2682	1.1886
870	52199s	0.799	0.7612	0.8011	0.8638	0.8086	0.8738	0.896	0.8814	0.9644	1.0638	1.101	1.2412	0.7769	0.7763	0.8289	0.8852	0.8954	1.0794	0.7675	0.6721	0.6446	0.8074	0.8433	0.754	0.8573	0.7066	0.9513	1.1816	1.264	1.2419	0.7671	0.8757	0.8592	0.8924	0.9645	1.0926	0.8383	0.8392	0.8641	0.8915	0.8937	0.9421	0.9871	1.0124	1.0257	1.1613	1.2719	1.1913
880	52799s	0.7986	0.7624	0.8022	0.8677	0.8119	0.8766	0.9219	0.8888	0.9681	1.0653	1.0934	1.24	0.7766	0.7754	0.8286	0.8852	0.8908	1.0836	0.7706	0.6723	0.6458	0.8082	0.8488	0.7552	0.8618	0.6933	0.9524	1.1814	1.2652	1.2427	0.7674	0.8754	0.8609	0.8929	0.9655	1.092	0.8379	0.8374	0.866	0.8937	0.8939	0.9465	0.9893	1.0145	1.0313	1.1527	1.2726	1.1926
890	53399s	0.8007	0.7628	0.8029	0.8722	0.8149	0.8788	1.0069	0.8924	0.9718	1.0677	1.0989	1.244	0.7771	0.7741	0.828	0.8856	0.89	1.0841	0.7737	0.6739	0.6465	0.8094	0.8549	0.7564	0.8674	0.6785	0.9515	1.1824	1.2663	1.242	0.7671	0.8768	0.8608	0.8943	0.9657	1.0922	0.8382	0.8414	0.8661	0.8948	0.8997	0.9485	0.9928	1.0195	1.0344	1.1628	1.2771	1.2008
900	53999s	0.8004	0.7637	0.8009	0.8736	0.8201	0.8782	0.942	0.8968	0.9729	1.0693	1.0959	1.2404	0.7769	0.7734	0.8258	0.8851	0.8889	1.085	0.7755	0.6748	0.6476	0.8098	0.8601	0.7589	0.8699	0.6712	0.9535	1.1757	1.2659	1.2444	0.7662	0.8774	0.8619	0.8941	0.9657	1.0904	0.8376	0.8395	0.8738	0.8966	0.8995	0.9487	0.9943	1.0212	1.0365	1.1541	1.2759	1.1968
910	54599s	0.8004	0.7643	0.802	0.8772	0.8255	0.8803	0.9534	0.8996	0.9759	1.0712	1.0982	1.248	0.7774	0.7721	0.8255	0.8853	0.8882	1.0876	0.7762	0.6766	0.6481	0.8109	0.8645	0.7599	0.8775	0.662	0.9531	1.1759	1.2667	1.2458	0.7659	0.8766	0.8613	0.8939	0.9663	1.0968	0.8377	0.8406	0.8794	0.8978	0.9024	0.9519	0.9972	1.024	1.0392	1.1619	1.2795	1.1977
920	55199s	0.8004	0.7643	0.8026	0.8788	0.83	0.8809	0.9546	0.9026	0.9785	1.0731	1.1033	1.2497	0.777	0.7716	0.8234	0.8857	0.8883	1.0911	0.7763	0.679	0.6487	0.8119	0.867	0.7623	0.8862	0.6499	0.9573	1.1755	1.2672	1.2467	0.7659	0.8785	0.8621	0.8943	0.9677	1.094	0.8376	0.8389	0.8811	0.9002	0.903	0.9528	1.0004	1.027	1.0426	1.1692	1.2854	1.2065
930	55799s	0.7983	0.7651	0.8039	0.8783	0.8331	0.8832	0.9548	0.9054	0.982	1.0749	1.1084	1.2549	0.7766	0.7706	0.8221	0.8851	0.8872	1.0963	0.775	0.6817	0.6499	0.8123	0.8694	0.7634	0.8853	0.6275	0.9613	1.1752	1.2692	1.2474	0.7639	0.8775	0.8619	0.8938	0.9683	1.0974	0.8378	0.8382	0.8786	0.9015	0.9039	0.9538	1.0029	1.0296	1.0451	1.1739	1.2905	1.2091
940	56399s	0.8003	0.7655	0.8029	0.8812	0.8351	0.8842	0.9721	0.9086	0.985	1.0773	1.1174	1.2566	0.7764	0.7706	0.8207	0.8857	0.8918	1.1008	0.7742	0.6845	0.6516	0.8141	0.871	0.766	0.8875	0.6181	0.9677	1.1764	1.2707	1.251	0.7637	0.8789	0.8657	0.8941	0.9683	1.0939	0.8383	0.8416	0.8764	0.9029	0.9049	0.9545	1.006	1.0321	1.0472	1.1793	1.2939	1.2153
950	56999s	0.8003	0.7656	0.8037	0.8838	0.8365	0.8858	0.9758	0.9102	0.9887	1.0796	1.1096	1.2559	0.7764	0.7691	0.8197	0.8858	0.8849	1.0996	0.7744	0.6881	0.6529	0.8175	0.8727	0.7672	0.8911	0.5995	0.9684	1.1754	1.2696	1.2503	0.7635	0.8755	0.8605	0.8937	0.9669	1.0981	0.8377	0.8429	0.8766	0.9042	0.9075	0.9582	1.0072	1.0347	1.0499	1.1718	1.2905	1.2064
960	57599s	0.7997	0.7652	0.8026	0.8905	0.838	0.8861	0.983	0.9119	0.9904	1.081	1.1154	1.2576	0.7764	0.7659	0.8171	0.886	0.8837	1.1016	0.7724	0.6911	0.6546	0.8201	0.8741	0.7684	0.8893	0.592	0.9763	1.1749	1.2704	1.2492	0.7624	0.8766	0.863	0.8929	0.9685	1.0995	0.8374	0.8435	0.8754	0.9057	0.908	0.9587	1.01	1.0371	1.053	1.1745	1.295	1.2142
970	58199s	0.7986	0.7649	0.8023	0.8923	0.839	0.8869	1.0796	0.9139	0.9928	1.0831	1.1145	1.2597	0.7754	0.7644	0.815	0.8859	0.8805	1.1027	0.7737	0.694	0.6553	0.8238	0.8751	0.7694	0.8922	0.5842	0.9766	1.1766	1.2712	1.2494	0.7616	0.8754	0.8619	0.8931	0.9669	1.0995	0.8381	0.8433	0.874	0.9072	0.9092	0.9638	1.0121	1.0392	1.0547	1.1753	1.2962	1.2121
980	58799s	0.8001	0.7666	0.8037	0.8964	0.84	0.8885	1.0272	0.9156	0.9947	1.0854	1.1076	1.2617	0.7751	0.7622	0.813	0.8865	0.8738	1.1021	0.7827	0.6949	0.6564	0.8275	0.8771	0.7714	0.897	0.575	0.9769	1.176	1.2721	1.2497	0.7603	0.8758	0.8619	0.8922	0.9665	1.0975	0.8379	0.8469	0.8756	0.9113	0.9123	0.9657	1.0133	1.0417	1.0579	1.1746	1.2965	1.2118
990	59399s	0.8008	0.7677	0.8034	0.8997	0.8413	0.8897	1.0323	0.9193	0.9969	1.0878	1.1174	1.2624	0.7751	0.7616	0.8102	0.8861	0.8764	1.1003	0.7835	0.6957	0.6587	0.8296	0.8775	0.7754	0.9769	0.5713	0.9789	1.1699	1.2718	1.2527	0.7605	0.8737	0.8603	0.8936	0.9656	1.095	0.8384	0.8469	0.8746	0.913	0.9124	0.9676	1.0155	1.0435	1.061	1.1804	1.2973	1.2137
1000	59999s	0.8023	0.7666	0.804	0.9006	0.8419	0.8911	1.0394	0.9191	0.9991	1.0906	1.1163	1.2665	0.7747	0.7585	0.808	0.8866	0.8708	1.1034	0.7751	0.6968	0.6583	0.8326	0.8798	0.7765	0.9842	0.5673	0.9821	1.1702	1.2732	1.2502	0.7592	0.8765	0.8645	0.8926	0.9673	1.0989	0.8412	0.8473	0.8757	0.9132	0.9128	0.9692	1.0171	1.0455	1.0626	1.1871	1.302	1.2164
1010	60599s	0.8053	0.7661	0.8035	0.9018	0.8427	0.8915	1.0436	0.9209	1.0001	1.0927	1.1204	1.2667	0.7746	0.7565	0.8053	0.8857	0.8693	1.0997	0.7718	0.6957	0.6614	0.8379	0.881	0.7808	0.9769	0.5629	0.9808	1.1662	1.273	1.252	0.7583	0.8722	0.8617	0.8929	0.9662	1.0963	0.8425	0.8482	0.8749	0.9155	0.915	0.971	1.0185	1.0477	1.065	1.1906	1.3006	1.2162
1020	61199s	0.8093	0.7667	0.8028	0.9046	0.8432	0.8929	1.048	0.9237	1.0027	1.0946	1.1232	1.2672	0.7743	0.7554	0.8035	0.8865	0.868	1.099	0.7725	0.6965	0.6629	0.8425	0.882	0.7865	1.0291	0.5593	0.9816	1.163	1.2733	1.2527	0.7576	0.869	0.8604	0.8948	0.9657	1.0942	0.844	0.8496	0.8747	0.9158	0.9179	0.9741	1.0199	1.0501	1.0674	1.1879	1.3016	1.2163
1030	61799s	0.8174	0.7667	0.8036	0.9053	0.8445	0.8918	1.0514	0.9258	1.003	1.0955	1.1216	1.2674	0.773	0.753	0.7999	0.8858	0.864	1.0966	0.7595	0.6964	0.6643	0.8443	0.8818	0.7905	1.0708	0.555	0.9842	1.1601	1.2739	1.2529	0.7561	0.8688	0.8582	0.8922	0.9658	1.0956	0.8452	0.8512	0.8757	0.9191	0.9196	0.9768	1.0218	1.0516	1.07	1.185	1.3027	1.2141
1040	62399s	0.8385	0.7667	0.8068	0.9071	0.8458	0.8941	1.0538	0.9266	1.0058	1.0961	1.1202	1.2725	0.7717	0.7508	0.7981	0.8851	0.8593	1.1	0.7326	0.6969	0.6643	0.8494	0.8846	0.7916	1.0544	0.555	0.987	1.1619	1.276	1.2515	0.7552	0.8688	0.8605	0.8925	0.9677	1.1008	0.8453	0.8538	0.8777	0.9204	0.9182	0.9841	1.0222	1.0541	1.0722	1.1945	1.3069	1.2225
1050	62999s	0.8517	0.7686	0.8063	0.9113	0.8462	0.8941	1.0558	0.9288	1.0067	1.0961	1.1208	1.2702	0.7716	0.749	0.7945	0.885	0.856	1.0921	0.7273	0.6969	0.6666	0.8301	0.8844	0.7946	1.0417	0.5498	0.9864	1.1556	1.2744	1.2541	0.7539	0.8629	0.8551	0.8918	0.9643	1.0948	0.8464	0.8559	0.8806	0.9214	0.9261	0.9881	1.0235	1.056	1.0742	1.1847	1.3055	1.2149
1060	63599s	0.8735	0.7693	0.8074	0.9126	0.8477	0.8975	1.0564	0.9301	1.0083	1.0963	1.1219	1.2749	0.7704	0.7463	0.7921	0.8851	0.8512	1.0933	0.7158	0.697	0.6677	0.8184	0.8859	0.795	1.0347	0.5489	0.9888	1.1519	1.2754	1.2528	0.7523	0.8626	0.8556	0.8905	0.9646	1.0963	0.8505	0.8577	0.881	0.9228	0.9216	0.9935	1.0245	1.0574	1.0793	1.1895	1.3073	1.2154
1070	64199s	0.8806	0.7703	0.8096	0.916	0.8479	0.8977	1.0581	0.9318	1.0094	1.0965	1.1359	1.275	0.7697	0.7445	0.7892	0.8849	0.8542	1.0886	0.7164	0.6979	0.6702	0.8204	0.8864	0.7961	1.0334	0.5464	0.9888	1.15	1.2746	1.2542	0.7514	0.8598	0.8548	0.8905	0.9638	1.0926	0.8507	0.8563	0.8783	0.9229	0.9218	0.9964	1.0251	1.058	1.078	1.2009	1.3066	1.2218
1080	64799s	0.8839	0.7722	0.8104	0.9178	0.8482	0.9004	1.0592	0.9326	1.0103	1.0966	1.1347	1.2774	0.7683	0.7406	0.7866	0.8848	0.8489	1.0905	0.728	0.6981	0.6713	0.817	0.8863	0.7957	1.0295	0.5437	0.9921	1.1469	1.2754	1.252	0.7498	0.8598	0.8562	0.8902	0.9644	1.094	0.854	0.861	0.8803	0.9233	0.923	0.9999	1.0262	1.0597	1.079	1.204	1.3096	1.2238
1090	65399s	0.8859	0.7726	0.8116	0.919	0.8489	0.8957	1.0607	0.9336	1.0101	1.097	1.1303	1.2751	0.7676	0.7382	0.783	0.8838	0.8429	1.0812	0.8152	0.6991	0.6727	0.8057	0.886	0.7971	1.0262	0.5401	0.9896	1.1317	1.2745	1.2525	0.7485	0.8551	0.8476	0.8897	0.9608	1.0874	0.8559	0.8636	0.8827	0.9232	0.9234	1.0005	1.0258	1.0605	1.0801	1.1924	1.308	1.2133
1100	65999s	0.8882	0.7733	0.8152	0.9209	0.8499	0.8957	1.0621	0.9349	1.0109	1.0971	1.1282	1.2756	0.7666	0.7367	0.7808	0.8842	0.8392	1.0789	0.9773	0.6976	0.6733	0.8204	0.8872	0.7978	1.0279	0.5372	0.9895	1.1176	1.2749	1.253	0.7474	0.8502	0.8446	0.8891	0.9611	1.0836	0.8579	0.8651	0.8847	0.9236	0.9233	1.0065	1.0258	1.0614	1.0846	1.1895	1.3082	1.2138
1110	66599s	0.8887	0.7747	0.8207	0.9214	0.8495	0.8991	1.0634	0.935	1.0117	1.0966	1.1258	1.2756	0.765	0.7322	0.7778	0.8832	0.8326	1.0757	0.9462	0.6987	0.6741	0.8986	0.8873	0.7967	1.0276	0.536	0.9901	1.0962	1.2747	1.2503	0.7457	0.8476	0.8433	0.8876	0.9611	1.0862	0.8613	0.8667	0.8855	0.924	0.9249	1.0096	1.0268	1.0619	1.0845	1.1884	1.3079	1.2136
1120	67199s	0.8554	0.7766	0.822	0.9241	0.8495	0.8984	1.0645	0.9357	1.0113	1.0976	1.1374	1.2765	0.7644	0.7298	0.7747	0.8835	0.8342	1.0767	0.9514	0.6991	0.6741	1.0315	0.8873	0.7966	1.0296	0.5344	0.9935	1.0897	1.2758	1.2514	0.745	0.8497	0.8469	0.8883	0.9631	1.0848	0.8649	0.8676	0.8834	0.9247	0.9258	1.0097	1.0266	1.0624	1.0856	1.2018	1.3107	1.2212
1130	67799s	0.9102	0.7802	0.8261	0.9259	0.8508	0.8996	1.0661	0.9374	1.0125	1.0973	1.1181	1.2735	0.7628	0.7272	0.7726	0.8829	0.8237	1.0685	0.95	0.6995	0.675	1.036	0.8879	0.7978	1.0306	0.5321	0.9879	1.076	1.2736	1.2518	0.7428	0.8393	0.8362	0.8874	0.9598	1.0789	0.8698	0.8724	0.888	0.9245	0.9239	1.0185	1.0254	1.0621	1.0873	1.1765	1.3064	1.2068
1140	68399s	0.9662	0.7846	0.8329	0.9285	0.8519	0.9031	1.0675	0.9385	1.0123	1.098	1.1387	1.2769	0.7622	0.7256	0.7694	0.8836	0.8285	1.0755	0.951	0.7033	0.6753	1.0275	0.8876	0.7972	1.0322	0.5309	0.9931	1.0668	1.2743	1.2517	0.7423	0.8435	0.8433	0.8877	0.963	1.0826	0.8751	0.8768	0.8885	0.9248	0.9236	1.0193	1.0268	1.0624	1.0888	1.2009	1.3111	1.2249
1150	68999s	0.9912	0.7876	0.8409	0.9293	0.8509	0.9071	1.0686	0.9379	1.012	1.0972	1.1379	1.2777	0.7608	0.7223	0.7672	0.8831	0.8234	1.0739	0.9504	0.7054	0.6756	0.9802	0.8881	0.7973	1.0325	0.5293	0.9901	1.0669	1.274	1.2507	0.7411	0.8381	0.8378	0.8866	0.9628	1.0795	0.8795	0.8835	0.8893	0.9241	0.9257	1.0185	1.0255	1.0622	1.0858	1.202	1.3103	1.2182
1160	69599s	1.0202	0.7893	0.8489	0.9295	0.8534	0.9035	1.0699	0.9383	1.0116	1.098	1.1346	1.2765	0.7604	0.7191	0.7647	0.8816	0.8201	1.0763	0.9506	0.7082	0.6742	0.9599	0.8886	0.7969	1.0322	0.5281	0.9919	1.0668	1.2732	1.25	0.7391	0.8363	0.8383	0.8858	0.9637	1.078	0.8829	0.8909	0.8705	0.9246	0.9259	1.019	1.0247	1.062	1.0914	1.2002	1.3103	1.2196
1170	70199s	0.9922	0.7934	0.8489	0.9303	0.8576	0.9026	1.071	0.9385	1.0111	1.0972	1.1388	1.2772	0.7592	0.7158	0.7618	0.8809	0.8155	1.0718	0.9505	0.7089	0.6739	0.9597	0.8883	0.7983	1.0327	0.5271	0.9896	1.0671	1.2721	1.2496	0.7377	0.8307	0.8319	0.8854	0.9601	1.0739	0.886	0.8923	0.8593	0.9234	0.9254	1.0207	1.0236	1.0619	1.0973	1.2044	1.3103	1.2185
1180	70799s	0.9916	0.8	0.8576	0.9289	0.8538	0.9025	1.0724	0.9392	1.0109	1.0971	1.1295	1.2732	0.7571	0.7131	0.7589	0.8799	0.805	1.0587	0.9507	0.7082	0.6742	0.9596	0.8877	0.7977	1.0323	0.5245	0.9849	1.0662	1.2697	1.2494	0.7354	0.825	0.8253	0.8853	0.9558	1.065	0.8901	0.8968	0.8619	0.9239	0.9243	1.0222	1.0233	1.0611	1.1059	1.1886	1.3078	1.209
1190	71399s	0.9603	0.8034	0.8591	0.9299	0.8564	0.9021	1.0746	0.9393	1.0095	1.0974	1.1341	1.2728	0.7569	0.7109	0.756	0.8802	0.8019	1.057	0.953	0.7047	0.6744	0.961	0.8865	0.798	1.0335	0.5234	0.9856	1.0671	1.2693	1.249	0.7347	0.8247	0.8262	0.8854	0.9552	1.0675	0.8952	0.9011	0.8601	0.9252	0.9238	1.0261	1.0318	1.0606	1.1383	1.1968	1.3069	1.2156
1200	71999s	0.9452	0.8096	0.8679	0.9149	0.8493	0.902	1.0757	0.9386	1.0091	1.0975	1.1215	1.2695	0.755	0.7075	0.754	0.8789	0.7913	1.0491	0.9527	0.7051	0.6749	0.9595	0.8857	0.7969	1.0327	0.5216	0.9783	1.0653	1.2675	1.2474	0.7324	0.8198	0.8193	0.8831	0.952	1.0587	0.8981	0.9072	0.8433	0.9264	0.9255	1.0285	1.0348	1.0671	1.1862	1.1787	1.3037	1.2027
1210	72599s	0.9521	0.8141	0.8687	0.903	0.8495	0.9009	1.077	0.9383	1.0083	1.0979	1.1303	1.2702	0.7545	0.7055	0.7517	0.8798	0.7927	1.0504	0.9544	0.7079	0.679	0.962	0.885	0.7967	1.0346	0.521	0.982	1.067	1.2666	1.2478	0.731	0.8182	0.8204	0.8843	0.9534	1.0568	0.8988	0.9068	0.8411	0.9274	0.927	1.0268	1.0332	1.0711	1.1889	1.1833	1.3043	1.209
1220	73199s	0.9496	0.8213	0.8723	0.9419	0.8486	0.9012	1.0773	0.938	1.0079	1.0975	1.1292	1.2678	0.7529	0.703	0.7491	0.8784	0.7871	1.0428	0.9546	0.7099	0.6808	0.9613	0.885	0.7961	1.0343	0.5188	0.9772	1.0657	1.2638	1.2465	0.7289	0.8116	0.8138	0.8828	0.9502	1.049	0.8991	0.9072	0.8445	0.9259	0.9268	1.0263	1.0284	1.0717	1.1057	1.1781	1.3083	1.2094
1230	73799s	0.9452	0.8248	0.8768	1.0415	0.8492	0.9024	1.0777	0.9377	1.01	1.0976	1.1222	1.2672	0.7515	0.6995	0.746	0.8777	0.7807	1.0401	0.9555	0.7091	0.6792	0.9619	0.8832	0.7943	1.0345	0.5182	0.9775	1.0657	1.2636	1.2446	0.7276	0.8116	0.8145	0.8824	0.9491	1.0516	0.8987	0.907	0.8434	0.926	0.9268	1.0272	1.0233	1.0668	1.0819	1.1719	1.3116	1.211
1240	74399s	0.9535	0.8262	0.8747	1.0049	0.8482	0.9004	1.0777	0.936	1.0153	1.0972	1.1312	1.2654	0.7509	0.6965	0.7436	0.8782	0.7836	1.0383	0.9565	0.7083	0.6765	0.9623	0.8825	0.7934	1.0351	0.5168	0.975	1.0654	1.2619	1.243	0.7263	0.8078	0.811	0.8814	0.9485	1.0476	0.8982	0.9065	0.8385	0.9258	0.9267	1.0258	1.0194	1.0624	1.0818	1.1791	1.3115	1.2105
1250	74999s	0.9566	0.8281	0.8755	1.0425	0.8476	0.9015	1.0778	0.9363	1.0158	1.097	1.1341	1.2654	0.7482	0.6956	0.7411	0.8779	0.7814	1.0447	0.9582	0.7103	0.678	0.9622	0.8815	0.7946	1.035	0.516	0.9756	1.0646	1.26	1.2432	0.7247	0.8046	0.8073	0.881	0.947	1.0445	0.8987	0.9064	0.8312	0.9256	0.926	1.0263	1.017	1.0574	1.0827	1.1796	1.3109	1.2076
1260	75599s	0.9581	0.83	0.8774	1.0054	0.8472	0.9017	1.0785	0.9346	1.013	1.097	1.136	1.2636	0.7481	0.6919	0.739	0.8775	0.7736	1.0382	0.9608	0.7094	0.6779	0.9624	0.8807	0.7922	1.0358	0.5154	0.9716	1.0645	1.2586	1.2398	0.724	0.8011	0.8031	0.8802	0.943	1.0403	0.8979	0.9053	0.8299	0.9256	0.9272	1.0258	1.013	1.054	1.0892	1.1825	1.3088	1.2026
1270	76199s	0.9598	0.831	0.8778	0.9947	0.8464	0.9014	1.0876	0.9348	1.0092	1.0978	1.1368	1.2642	0.7475	0.69	0.7367	0.8783	0.7672	1.0364	0.9621	0.7217	0.6773	0.9635	0.8809	0.7925	1.036	0.5136	0.9691	1.0643	1.2567	1.2394	0.7225	0.799	0.8013	0.8801	0.9422	1.037	0.8969	0.9033	0.8277	0.9268	0.928	1.0254	1.0095	1.0511	1.111	1.1891	1.3059	1.2012
1280	76799s	0.9633	0.8353	0.8779	0.9949	0.8456	0.9017	1.0863	0.9337	1.0053	1.0963	1.1421	1.2631	0.7455	0.6872	0.7344	0.8774	0.7625	1.03	0.9625	0.7247	0.6814	0.9633	0.8808	0.7921	1.0357	0.5129	0.9677	1.0632	1.2551	1.238	0.7218	0.7977	0.7988	0.8791	0.9388	1.0343	0.8974	0.9031	0.827	0.927	0.9263	1.0252	1.0065	1.0476	1.1347	1.1973	1.3037	1.1961
1290	77399s	0.9679	0.8382	0.8811	0.9956	0.8447	0.9017	1.0801	0.9331	1.0013	1.0962	1.1415	1.26	0.7444	0.6843	0.7327	0.8777	0.7616	1.0245	0.9631	0.7198	0.6762	0.9634	0.8787	0.7915	1.0367	0.5127	0.9679	1.0634	1.2529	1.2353	0.7194	0.7949	0.7961	0.8788	0.9339	1.0306	0.896	0.9021	0.8278	0.9321	0.9262	1.0242	1.0044	1.0447	1.1543	1.2049	1.302	1.1934
1300	77999s	0.9641	0.8396	0.8787	0.9959	0.8438	0.9014	1.0739	0.9414	0.9981	1.0958	1.1408	1.2606	0.7435	0.6833	0.7299	0.8773	0.7561	1.0272	0.9634	0.7184	0.6758	0.9643	0.8787	0.7911	1.0369	0.5117	0.9646	1.0626	1.2514	1.2353	0.7171	0.7916	0.7925	0.877	0.933	1.0306	0.8962	0.902	0.8246	0.9356	0.9258	1.0252	1.001	1.0415	1.1766	1.2043	1.2983	1.1879
1310	78599s	0.9731	0.8388	0.8803	1.0015	0.8433	0.9013	1.068	0.9404	0.9945	1.095	1.144	1.2584	0.7421	0.68	0.7282	0.8769	0.759	1.0365	0.9632	0.719	0.6748	0.9644	0.8793	0.7892	1.0374	0.5117	0.9642	1.0622	1.2494	1.2312	0.716	0.7898	0.7897	0.8766	0.9335	1.0313	0.896	0.9036	0.8177	0.9351	0.9262	1.0327	0.9982	1.0388	1.1877	1.2123	1.2967	1.1911
1320	79199s	0.9719	0.8384	0.8787	1.009	0.8425	0.9025	1.0642	0.9364	0.9909	1.0945	1.147	1.2563	0.7416	0.677	0.7253	0.8755	0.7579	1.0358	0.9638	0.7177	0.6747	0.965	0.8788	0.7895	1.0374	0.5101	0.9604	1.0617	1.2473	1.2305	0.7151	0.7873	0.7863	0.8766	0.931	1.0251	0.8957	0.9014	0.8174	0.931	0.9252	1.0346	0.9944	1.0355	1.1852	1.2163	1.295	1.1851
1330	79799s	0.9675	0.8381	0.8802	1.0114	0.8419	0.9006	1.0602	0.9321	0.9872	1.0943	1.1382	1.2548	0.7403	0.6753	0.7237	0.8741	0.7476	1.0316	0.9624	0.7177	0.6754	0.9645	0.8809	0.7896	1.0368	0.5084	0.9546	1.0608	1.2452	1.2294	0.7131	0.7847	0.7836	0.8755	0.9289	1.023	0.8966	0.9006	0.8049	0.9276	0.9251	1.0319	0.9909	1.032	1.1808	1.2043	1.2929	1.1754
1340	80399s	0.9631	0.8373	0.8819	1.0145	0.8425	0.9034	1.0578	0.9278	0.9859	1.0937	1.1277	1.2564	0.7395	0.6726	0.7217	0.8732	0.7351	1.0118	0.9631	0.7169	0.6745	0.9652	0.8812	0.7896	1.0371	0.5072	0.9492	1.0607	1.2428	1.2266	0.7123	0.7806	0.7803	0.8752	0.9249	1.0162	0.8966	0.8993	0.8059	0.9247	0.9291	1.0272	0.9876	1.0277	1.1851	1.1893	1.2878	1.1669
1350	80999s	0.9713	0.8382	0.8806	1.0175	0.8416	0.9082	1.0547	0.9241	0.9819	1.0931	1.1348	1.2621	0.7393	0.6708	0.7199	0.8732	0.7363	1.0156	0.9631	0.7152	0.6808	0.9667	0.8844	0.7868	1.0375	0.5069	0.9518	1.0605	1.2407	1.225	0.7117	0.779	0.7788	0.8749	0.9237	1.0214	0.8961	0.8995	0.8015	0.923	0.9332	1.0215	0.9852	1.0256	1.1828	1.1925	1.2877	1.1701
1360	81599s	0.9711	0.8374	0.8815	1.0176	0.8413	0.9131	1.052	0.921	0.9801	1.0962	1.1409	1.2643	0.7373	0.6684	0.7179	0.8709	0.7348	1.014	0.9615	0.7136	0.6825	0.9652	0.8896	0.7867	1.0358	0.5063	0.9469	1.0586	1.239	1.2223	0.7097	0.7751	0.7758	0.8728	0.9212	1.0194	0.8955	0.896	0.8017	0.9213	0.9304	1.0189	0.982	1.0219	1.1683	1.1963	1.2855	1.1669
1370	82199s	0.9703	0.8368	0.8804	1.0181	0.841	0.9116	1.0501	0.9202	0.9752	1.0962	1.139	1.2644	0.7375	0.6666	0.7154	0.8718	0.7334	1.0122	0.9622	0.714	0.6779	0.9671	0.8885	0.7853	1.036	0.506	0.9448	1.0594	1.2369	1.2206	0.7092	0.7736	0.773	0.8741	0.9194	1.0167	0.8959	0.8978	0.804	0.9189	0.9288	1.0173	0.9785	1.0193	1.155	1.191	1.2838	1.1644
1380	82799s	0.9701	0.8361	0.8808	1.0179	0.8413	0.91	1.0473	0.9146	0.9723	1.0929	1.1301	1.2626	0.7359	0.6644	0.7139	0.8699	0.7232	0.9971	0.9606	0.7152	0.6771	0.9661	0.8892	0.7847	1.0349	0.5052	0.9352	1.0582	1.2351	1.2184	0.7077	0.7704	0.7699	0.8726	0.9141	1.0082	0.8959	0.8999	0.8034	0.9162	0.9269	1.0163	0.9768	1.0177	1.1431	1.1761	1.2796	1.1571
1390	83399s	0.9772	0.8355	0.8799	1.0171	0.8408	0.9084	1.0453	0.9114	0.9693	1.0887	1.1376	1.2593	0.7347	0.6625	0.7124	0.8697	0.7303	1.0083	0.9605	0.7198	0.6798	0.9667	0.8847	0.7846	1.0341	0.5063	0.9331	1.0575	1.2327	1.2157	0.7067	0.7694	0.767	0.8722	0.9165	1.0104	0.8968	0.8996	0.8047	0.9131	0.9218	1.0147	0.9742	1.0149	1.1359	1.1784	1.2798	1.1595
1400	83999s	0.9789	0.8349	0.8804	1.0207	0.844	0.9113	1.0428	0.9082	0.9665	1.0849	1.1442	1.2595	0.7339	0.6603	0.71	0.8686	0.7228	1.0109	0.9599	0.7169	0.6857	0.9677	0.884	0.783	1.0332	0.5052	0.926	1.057	1.2312	1.2144	0.7058	0.7657	0.7646	0.8721	0.9125	1.0091	0.9014	0.8979	0.8048	0.9147	0.9191	1.0116	0.9714	1.0109	1.1275	1.1837	1.2762	1.155
1410	84599s	0.9849	0.8359	0.8801	1.0174	0.8489	0.9099	1.0401	0.9063	0.9634	1.0804	1.1403	1.2559	0.7323	0.659	0.7081	0.8683	0.7109	0.9911	0.9587	0.7134	0.6834	0.9671	0.8779	0.7831	1.0316	0.5044	0.9183	1.055	1.2324	1.2139	0.7038	0.7633	0.7619	0.8707	0.9106	1.0021	0.9042	0.8978	0.8079	0.9144	0.918	1.0106	0.9691	1.0081	1.1212	1.1655	1.2726	1.1452
1420	85199s	0.9986	0.8347	0.8789	1.0123	0.845	0.9067	1.0386	0.9019	0.9612	1.0776	1.1445	1.2541	0.7319	0.6569	0.7063	0.8674	0.7048	0.9794	0.959	0.7178	0.6828	0.9681	0.8776	0.7827	1.0316	0.5036	0.911	1.0553	1.2345	1.2115	0.7042	0.7601	0.7586	0.8713	0.9087	0.9994	0.9006	0.9014	0.7843	0.9126	0.9171	1.006	0.9657	1.0065	1.1148	1.1643	1.2688	1.1422
1430	85799s	0.9996	0.8343	0.879	1.0081	0.8402	0.9077	1.0367	0.8988	0.9588	1.0743	1.1412	1.2495	0.7314	0.655	0.7044	0.8671	0.701	0.9743	0.9589	0.7186	0.682	0.9683	0.8771	0.7823	1.0319	0.5027	0.9048	1.0546	1.234	1.2089	0.7027	0.7581	0.7571	0.8711	0.9065	0.9919	0.8974	0.9004	0.7869	0.9074	0.9219	1.0035	0.9632	1.0031	1.1105	1.1523	1.2663	1.1358
	Date of measurement: 2019-02-14/Time of measurement: 10:10:43
	cinetique 37C zb 24h.mth
	14022019-001.wsp
[truncated: 24 more columns]
