# Supplementary material for: A qnr-plasmid allows aminoglycosides to induce SOS in Escherichia coli
Source: eLife. 2022 Jan 17;11:e69511. doi: 10.7554/eLife.69511 (PMC8789287; doi:10.7554/eLife.69511)
Supplement: Figure 4—source data 4. [file elife-69511-fig4-data4.xlsx]

## Sheet: WT_pDIJ_pTOPO_TOB vs LB
		Target gene	HKG	ΔCt	2^-ΔCt	2^-ΔCt moy	SD 2^-ΔCt	ΔΔCt	Fold change
		sfiA	dxs						2^-ΔΔCt
Calibrator	WT/DIJ_pTOPO_LB 1	20.92	19.65
	WT/DIJ_pTOPO_LB 2	20.89	19.48
	WT/DIJ_pTOPO_LB 3	20.92	19.34
	replicat bio 1	20.91	19.49	1.42	0.373712
	WT/DIJ_pTOPO_LB 4	21.02	19.98
	WT/DIJ_pTOPO_LB 5	21.09	19.7
	WT/DIJ_pTOPO_LB 6	20.92	19.65
	replicat bio 2	21.01	19.7767	1.23333	0.425334
	WT/DIJ-pTOPO_LB 7	20.82	19.32
	WT/DIJ-pTOPO_LB 8	20.89	19.26
	WT/DIJ-pTOPO_LB 9	20.915	19.22
	replicat bio 3	20.875	19.2667	1.60833	0.327977
	WT/DIJ_pTOPO_LB 10	21.52	19.38
	WT/DIJ_pTOPO_LB 11	21.46	19.53
	WT/DIJ_pTOPO_LB 12	21.49	19.43
	replicat bio 4	21.49	19.4467	2.04333	0.242603
	WT/DIJ_pTOPO_LB 13	20.99	19.42
	WT/DIJ_pTOPO_LB 14	20.94	19.37
	WT/DIJ_pTOPO_LB 15	21.02	19.45
	replicat bio 5	20.9833	19.4133	1.57	0.336808
	WT/DIJ_pTOPO_LB 16	21.12	19.56
	WT/DIJ_pTOPO_LB 17	21.09	19.34
	WT/DIJ_pTOPO_LB 18	21.08	19.36
	replicat bio 6	21.0967	19.42	1.67667	0.312805
Test 1	WT/DIJ_pTOPO_TOB 1	19.46	19.56
	WT/DIJ_pTOPO_TOB 2	19.59	19.69
	WT/DIJ_pTOPO_TOB 3	19.14	19.65
	replicat bio 1	19.3967	19.6333	-0.236667	1.17827			-1.65667	3.15287
	WT/DIJ_pTOPO_TOB 4	19.45	19.56
	WT/DIJ_pTOPO_TOB 5	19.47	19.68
	WT/DIJ_pTOPO_TOB 6	19.38	19.61
	replicat bio 2	19.4333	19.6167	-0.183333	1.1355			-1.41667	2.66968
	WT/DIJ_pTOPO_TOB 7	19.48	19.62
	WT/DIJ_pTOPO_TOB 8	19.22	19.64
	WT/DIJ_pTOPO_TOB 9	19.38	19.69
	replicat bio 3	19.36	19.65	-0.29	1.22264			-1.89833	3.72782
	WT/DIJ_pTOPO_TOB 10	19.18	19.52
	WT/DIJ_pTOPO_TOB 11	19.25	19.48
	WT/DIJ_pTOPO_TOB 12	19.37	19.27
	replicat bio 4	19.2667	19.4233	-0.156667	1.11471			-2.2	4.59479
	WT/DIJ_pTOPO_TOB 13	19.31	19.52
	WT/DIJ_pTOPO_TOB 14	19.27	19.48
	WT/DIJ_pTOPO_TOB 15	19.32	19.56
	replicat bio 5	19.3	19.52	-0.22	1.16473			-1.79	3.45815
	WT/DIJ_pTOPO_TOB 16	20.63	20.02
	WT/DIJ_pTOPO_TOB 17	19.43	19.97
	WT/DIJ_pTOPO_TOB 18	19.54	19.95
	replicat bio 6	19.8667	19.98	-0.113333	1.08172			-1.79	3.45815

## Sheet: WT_pDIJ_pHmp_TOB vs LB
		Target gene	HKG	ΔCt	2^-ΔCt	2^-ΔCt moy	SD 2^-ΔCt	ΔΔCt	Fold change
		sfiA	dxs						2^-ΔΔCt
Calibrator	WT/DIJ/pHmp_LB 1	30.92	21.18
	WT/DIJ/pHmp_LB 2	30.94	21.16
	WT/DIJ/pHmp_LB 3	30.99	21.01
	replicat bio 1	30.95	21.1167	9.83333	0.00109615
	WT/DIJ/pHmp_LB 4	27.42	23.22
	WT/DIJ/pHmp_LB 5	27.23	23.24
	WT/DIJ/pHmp_LB 6	27.43	23.12
	replicat bio 2	27.36	23.1933	4.16667	0.0556812
	WT/DIJ/pHmp_LB 7	23.2	25.42
	WT/DIJ/pHmp_LB 8	23.26	25.4
	WT/DIJ/pHmp_LB 9	23.1	25.42
	replicat bio 3	23.1867	25.4133	-2.22667	4.68051
	WT/DIJ/pHmp_LB 10	23.12	24.99
	WT/DIJ/pHmp_LB 11	23.42	25.32
	WT/DIJ/pHmp_LB 12	23.15	24.99
	replicat bio 4	23.23	25.1	-1.87	3.65533
	WT/DIJ/pHmp_LB 13	27.04	23.26
	WT/DIJ/pHmp_LB 14	26.99	23.21
	WT/DIJ/pHmp_LB 15	27	23.22
	replicat bio 5	27.01	23.23	3.78	0.0727958
	WT/DIJ/pHmp_LB 16	26.78	23.17
	WT/DIJ/pHmp_LB 17	26.56	23.22
	WT/DIJ/pHmp_LB 18	26.56	23.23
	replicat bio 6	26.6333	23.2067	3.42667	0.0929973
Test 1	WT/DIJ/pHmp_TOB 1	29.94	19.67
	WT/DIJ/pHmp_TOB 2	30.2	19.7
	WT/DIJ/pHmp_TOB 3	30.01	19.62
	replicat bio 1	30.05	19.6633	10.3867	0.000746968			0.553333	0.681444
	WT/DIJ/pHmp_TOB 4	27.19	22.87
	WT/DIJ/pHmp_TOB 5	27.6	22.62
	WT/DIJ/pHmp_TOB 6	27.18	22.41
	replicat bio 2	27.3233	22.6333	4.69	0.0387409			0.523333	0.695762
	WT/DIJ/pHmp_TOB 7	23.68	25.96
	WT/DIJ/pHmp_TOB 8	23.7	25.79
	WT/DIJ/pHmp_TOB 9	23.62	25.96
	replicat bio 3	23.6667	25.9033	-2.23667	4.71307			-0.01	1.00696
	WT/DIJ/pHmp_TOB10	23.48	25.47
	WT/DIJ/pHmp_TOB11	23.46	25.76
	WT/DIJ/pHmp_TOB12	23.65	25.43
	replicat bio 4	23.53	25.5533	-2.02333	4.06522			-0.153333	1.11214
	WT/DIJ/pHmp_TOB13	26.67	22.68
	WT/DIJ/pHmp_TOB14	26.44	22.43
	WT/DIJ/pHmp_TOB15	26.16	22.16
	replicat bio 5	26.4233	22.4233	4	0.0625			0.22	0.858565
	WT/DIJ/pHmp_TOB16	26.08	22.52
	WT/DIJ/pHmp_TOB17	26.48	22.75
	WT/DIJ/pHmp_TOB18	26.43	22.74
	replicat bio 6	26.33	22.67	3.66	0.0791098			0.233333	0.850667

## Sheet: DHmp_pDIJ_TOB vs LB
		Target gene	HKG	ΔCt	2^-ΔCt	2^-ΔCt moy	SD 2^-ΔCt	ΔΔCt	Fold change
		sfiA	dxs						2^-ΔΔCt
Calibrator	Δhmp/pDIJ_LB 1	22.43	23.47
	Δhmp/pDIJ_LB 2	22.34	23.59
	Δhmp/pDIJ_LB 3	21.55	23.49
	replicat bio 1	22.1067	23.5167	-1.41	2.65737
	Δhmp/pDIJ_LB 4	21.49	22.59
	Δhmp/pDIJ_LB 5	21.51	22.72
	Δhmp/pDIJ_LB 6	22.17	22.68
	replicat bio 2	21.7233	22.6633	-0.94	1.91853
	Δhmp/pDIJ_LB 7	22.52	23.45
	Δhmp/pDIJ_LB 8	22.34	23.42
	Δhmp/pDIJ_LB 9	22.42	23.48
	replicat bio 3	22.4267	23.45	-1.02333	2.03261
	Δhmp/pDIJ_LB 10	21.38	22.57
	Δhmp/pDIJ_LB 11	21.48	22.56
	Δhmp/pDIJ_LB 12	22.02	22.82
	replicat bio 4	21.6267	22.65	-1.02333	2.03261
	Δhmp/pDIJ_LB 13	22.04	22.99
	Δhmp/pDIJ_LB 14	21.89	22.96
	Δhmp/pDIJ_LB 15	21.86	23.14
	replicat bio 5	21.93	23.03	-1.1	2.14355
	Δhmp/pDIJ_LB 16	22.03	23.12
	Δhmp/pDIJ_LB 17	22.05	23.22
	Δhmp/pDIJ_LB 18	22.06	23.16
	replicat bio 6	22.0467	23.1667	-1.12	2.17347
Test 1	Δhmp/DIJ_TOB 1	21.33	24.07
	Δhmp/DIJ_TOB 2	21.12	23.94
	Δhmp/DIJ_TOB 3	20.3	24.03
	replicat bio 1	20.9167	24.0133	-3.09667	8.5544			-1.68667	3.21912
	Δhmp/pDIJ_TOB 4	19.85	21.87
	Δhmp/pDIJ_TOB 5	19.92	22
	Δhmp/pDIJ_TOB 6	19.98	21.93
	replicat bio 2	19.9167	21.9333	-2.01667	4.04648			-1.07667	2.10916
	Δhmp/pDIJ_TOB 7	21.04	23.78
	Δhmp/pDIJ_TOB 8	21.13	23.87
	Δhmp/pDIJ_TOB 9	20.91	23.64
	replicat bio 3	21.0267	23.7633	-2.73667	6.66529			-1.71333	3.27918
	Δhmp/pDIJ_TOB 10	19.04	21.23
	Δhmp/pDIJ_TOB 11	19.04	21.26
	Δhmp/pDIJ_TOB 12	19.43	21.65
	replicat bio 4	19.17	21.38	-2.21	4.62675			-1.18667	2.27626
	Δhmp/pDIJ_TOB 13	19.67	22.14
	Δhmp/pDIJ_TOB 14	19.67	22.19
	Δhmp/pDIJ_TOB 15	19.52	22.07
	replicat bio 5	19.62	22.1333	-2.51333	5.70938			-1.41333	2.66352
	Δhmp/pDIJ_TOB 16	19.87	22.29
	Δhmp/pDIJ_TOB 17	19.64	22.24
	Δhmp/pDIJ_TOB 18	19.61	22.18
	replicat bio 6	19.7067	22.2367	-2.53	5.77572			-1.41	2.65737

## Sheet: WT_pDIJ_pTOPO cPTIO TOB vs LB
		Target gene	HKG	ΔCt	2^-ΔCt	2^-ΔCt moy	SD 2^-ΔCt	ΔΔCt	Fold change
		sfiA	dxs						2^-ΔΔCt
Calibrator	WT/pDIJ/pTOPO 1_LB+Carbo_1	13.57	13.56			0.782288
	WT/pDIJ/pTOPO 1_LB+Carbo_2	13.69	13.59
	WT/pDIJ/pTOPO 1_LB+Carbo_3	13.57	13.62
	replicat bio 1	13.61	13.59	0.02	0.986233
	WT/pDIJ/pTOPO 2_LB+Carbo_1	13.56	12.79
	WT/pDIJ/pTOPO 2_LB+Carbo_2	13.81	12.99
	WT/pDIJ/pTOPO 2_LB+Carbo_3	13.51	12.73
	replicat bio 2	13.6267	12.8367	0.79	0.578344
Test 1	WT/pDIJ/pTOPO 1_LB+TOB+Carbo_1	12.81	13.66
	WT/pDIJ/pTOPO 1_LB+TOB+Carbo_2	12.9	13.46
	WT/pDIJ/pTOPO 1_LB+TOB+Carbo_3	12.89	13.74
	replicat bio 1	12.8667	13.62	-0.753333	1.68568			-0.773333	1.70921
	WT/pDIJ/pTOPO 2_LB+TOB+Carbo_1	13.49	12.94
	WT/pDIJ/pTOPO 2_LB+TOB+Carbo_2	12.68	12.8
	WT/pDIJ/pTOPO 2_LB+TOB+Carbo_3	12.86	12.95
	replicat bio 2	13.01	12.8967	0.113333	0.92445			-0.676667	1.59844

## Sheet: WT_pDIJ_pHmp cPTIO TOB vs LB
		Target gene	HKG	ΔCt	2^-ΔCt	2^-ΔCt moy	SD 2^-ΔCt	ΔΔCt	Fold change
		sfiA	dxs						2^-ΔΔCt
Calibrator	WT/pDIJ/pHmp 1_LB+Carboxy_1	12.71	12.73
	WT/pDIJ/pHmp 1_LB+Carboxy_2	12.83	12.84
	WT/pDIJ/pHmp 1_LB+Carboxy_3	12.66	12.93
	replicat bio 1	12.7333	12.8333	-0.1	1.07177
	WT/pDIJ/pHmp 2_LB+Carboxy_1	14.61	13.72
	WT/pDIJ/pHmp 2_LB+Carboxy_2	14.78	13.91
	WT/pDIJ/pHmp 2_LB+Carboxy_3	14.61	13.86
	replicat bio 2	14.6667	13.83	0.836667	0.559936
Test 1	WT/pDIJ/pHmp 1_LB+TOB+Carboxy_1	12.69	12.74
	WT/pDIJ/pHmp 1_LB+TOB+Carboxy_2	12.66	12.84
	WT/pDIJ/pHmp 1_LB+TOB+Carboxy_3	12.72	12.75
	replicat bio 1	12.69	12.7767	-0.0866667	1.06191			0.0133333	0.990801
	WT/pDIJ/pHmp 2_LB+TOB+Carboxy_1	14.58	13.87
	WT/pDIJ/pHmp 2_LB+TOB+Carboxy_2	14.6	13.81
	WT/pDIJ/pHmp 2_LB+TOB+Carboxy_3	14.7	13.95
	replicat bio 2	14.6267	13.8767	0.75	0.594604			-0.0866667	1.06191

## Sheet: Dhmp_pDIJ cPTIO TOB vs LB
		Target gene	HKG	ΔCt	2^-ΔCt	2^-ΔCt moy	SD 2^-ΔCt	ΔΔCt	Fold change
		sfiA	dxs						2^-ΔΔCt
Calibrator	Δhmp/pDIJ 2_LB+carboxy_1	13.81	15.84
	Δhmp/pDIJ 2_LB+carboxy_2	13.66	15.58
	Δhmp/pDIJ 2_LB+carboxy_3	13.87	15.84
	replicat bio 1	13.78	15.7533	-1.97333	3.92674
	Δhmp/pDIJ 2_LB+carboxy_1	13.81	15.84
	Δhmp/pDIJ 2_LB+carboxy_2	13.66	15.58
	Δhmp/pDIJ 2_LB+carboxy_3	13.87	15.84
	replicat bio 2	13.78	15.7533	-1.97333	3.92674
Test 1	Δhmp/pDIJ 1_LB+TOB+carboxy_1	12.89	14.48
	Δhmp/pDIJ 1_LB+TOB+carboxy_2	13.37	14.67
	Δhmp/pDIJ 1_LB+TOB+carboxy_3	12.71	14.52
	replicat bio 1	12.99	14.5567	-1.56667	2.9622			0.406667	0.754364
	Δhmp/pDIJ 2_LB+TOB+carboxy_1	12.85	14.4
	Δhmp/pDIJ 2_LB+TOB+carboxy_2	11.96	13.87
	Δhmp/pDIJ 2_LB+TOB+carboxy_3	12.45	13.93
	replicat bio 2	12.42	14.0667	-1.64667	3.13109			0.326667	0.797377
