# Supplementary material for: A qnr-plasmid allows aminoglycosides to induce SOS in Escherichia coli
Source: eLife. 2022 Jan 17;11:e69511. doi: 10.7554/eLife.69511 (PMC8789287; doi:10.7554/eLife.69511)
Supplement: Figure 5—figure supplement 1—source data 1. [file elife-69511-fig5-figsupp1-data1.xlsx]

## Sheet: first assay
	MH	RIF	TOB	RIF		MH RIF/TOTAL	TOB RIF/TOTAL
MG1655_1	840000000	30	620000000	50		3.57143e-08	8.06452e-08
MG1655_2	960000000	50	580000000	60		5.20833e-08	1.03448e-07
MG1655_3	1200000000	140	1040000000	110		1.16667e-07	1.05769e-07
MG1655_4	1240000000	140	930000000	90		1.12903e-07	9.67742e-08
MG1655_5	1520000000	190	1020000000	110		1.25e-07	1.07843e-07
MG1655_6	1200000000	190	1200000000	110		1.58333e-07	9.16667e-08
MG1655/pDIJ09-518a_1	350000000	20	440000000	170		5.71429e-08	3.86364e-07
MG1655/pDIJ09-518a_2	520000000	50	980000000	120		9.61538e-08	1.22449e-07
MG1655/pDIJ09-518a_3	360000000	30	270000000	100		8.33333e-08	3.7037e-07
MG1655/pDIJ09-518a_4	360000000	20	420000000	120		5.55556e-08	2.85714e-07
MG1655/pDIJ09-518a_5	280000000	60	640000000	100		2.14286e-07	1.5625e-07
MG1655/pDIJ09-518a_6	520000000	40	150000000	120		7.69231e-08	8e-07

## Sheet: second assay
	MH	RIF	TOB	RIF		MH RIF/TOTAL	TOB RIF/TOTAL
MG1655_1	680000000	60	540000000	40		8.82353e-08	7.40741e-08
MG1655_2	360000000	30	600000000	10		8.33333e-08	1.66667e-08
MG1655_3	560000000	30	340000000	10		5.35714e-08	2.94118e-08
MG1655_4	420000000	60	360000000	50		1.42857e-07	1.38889e-07
MG1655_5	230000000	100	480000000	10		4.34783e-07	2.08333e-08
MG1655_6	300000000	50	280000000	20		1.66667e-07	7.14286e-08
MG1655/pDIJ09-518a_1	190000000	120	160000000	10		6.31579e-07	6.25e-08
MG1655/pDIJ09-518a_2	240000000	70	80000000	10		2.91667e-07	1.25e-07
MG1655/pDIJ09-518a_3	110000000	60	70000000	20		5.45455e-07	2.85714e-07
MG1655/pDIJ09-518a_4	240000000	50	70000000	80		2.08333e-07	1.14286e-06
MG1655/pDIJ09-518a_5	120000000	50	70000000	40		4.16667e-07	5.71429e-07
MG1655/pDIJ09-518a_6	450000000	40	40000000	30		8.88889e-08	7.5e-07

## Sheet: both together
	MH	RIF	TOB	RIF		MH RIF/TOTAL	TOB RIF/TOTAL
MG1655_1	840000000	30	620000000	50		3.57143e-08	8.06452e-08
MG1655_2	960000000	50	580000000	60		5.20833e-08	1.03448e-07
MG1655_3	1200000000	140	1040000000	110		1.16667e-07	1.05769e-07
MG1655_4	1240000000	140	930000000	90		1.12903e-07	9.67742e-08
MG1655_5	1520000000	190	1020000000	110		1.25e-07	1.07843e-07
MG1655_6	1200000000	190	1200000000	110		1.58333e-07	9.16667e-08
MG1655_7	680000000	60	540000000	40		8.82353e-08	7.40741e-08
MG1655_8	360000000	30	600000000	10		8.33333e-08	1.66667e-08
MG1655_9	560000000	30	340000000	10		5.35714e-08	2.94118e-08
MG1655_10	420000000	60	360000000	50		1.42857e-07	1.38889e-07
MG1655_11	230000000	100	480000000	10		4.34783e-07	2.08333e-08
MG1655_12	300000000	50	280000000	20		1.66667e-07	7.14286e-08
MG1655/pDIJ09-518a_1	350000000	20	440000000	170		5.71429e-08	3.86364e-07
MG1655/pDIJ09-518a_2	520000000	50	980000000	120		9.61538e-08	1.22449e-07
MG1655/pDIJ09-518a_3	360000000	30	270000000	100		8.33333e-08	3.7037e-07
MG1655/pDIJ09-518a_4	360000000	20	420000000	120		5.55556e-08	2.85714e-07
MG1655/pDIJ09-518a_5	280000000	60	640000000	100		2.14286e-07	1.5625e-07
MG1655/pDIJ09-518a_6	520000000	40	150000000	120		7.69231e-08	8e-07
MG1655/pDIJ09-518a_7	190000000	120	160000000	10		6.31579e-07	6.25e-08
MG1655/pDIJ09-518a_8	240000000	70	80000000	10		2.91667e-07	1.25e-07
MG1655/pDIJ09-518a_9	110000000	60	70000000	20		5.45455e-07	2.85714e-07
MG1655/pDIJ09-518a_10	240000000	50	70000000	80		2.08333e-07	1.14286e-06
MG1655/pDIJ09-518a_11	120000000	50	70000000	40		4.16667e-07	5.71429e-07
MG1655/pDIJ09-518a_12	450000000	40	40000000	30		8.88889e-08	7.5e-07
