# Supplementary material for: A qnr-plasmid allows aminoglycosides to induce SOS in Escherichia coli
Source: eLife. 2022 Jan 17;11:e69511. doi: 10.7554/eLife.69511 (PMC8789287; doi:10.7554/eLife.69511)
Supplement: Figure 5—source data 1. [file elife-69511-fig5-data1.xlsx]

## Sheet: WT_TOB vs LB
		Target gene	HKG	ΔCt	2^-ΔCt	2^-ΔCt moy	SD 2^-ΔCt	ΔΔCt	Fold change
		sfiA	dxs						2^-ΔΔCt
Calibrator	WT_LB 1	22.45	19.61
	WT_LB 2	22.29	19.62
	WT_LB 3	22.46	19.63
	replicat bio 1	22.4	19.62	2.78	0.145592
	WT_LB 4	22.23	19.36
	WT_LB 5	22.26	19.46
	WT_LB 6	22.49	19.31
	replicat bio 2	22.3267	19.3767	2.95	0.129408
	WT_LB 7	22.45	19.61
	WT_LB 8	22.29	19.62
	WT_LB 9	22.46	19.63
	replicat bio 3	22.4	19.62	2.78	0.145592
	WT_LB 10	22.23	19.36
	WT_LB 11	22.26	19.46
	WT_LB 12	22.49	19.31
	replicat bio 4	22.3267	19.3767	2.95	0.129408
	WT_LB 13	22.36	19.43
	WT_LB 14	22.38	19.54
	WT_LB 15	22.23	19.42
	replicat bio 5	22.3233	19.4633	2.86	0.137738
	WT_LB 16	22.43	19.47
	WT_LB 17	22.45	19.44
	WT_LB 18	22.22	19.58
	replicat bio 6	22.3667	19.4967	2.87	0.136787
Test 1	WT_TOB 1	21.98	19.22
	WT_TOB 2	22.04	19.44
	WT_TOB 3	22.32	19.32
	replicat bio 1	22.1133	19.3267	2.78667	0.14492			0.00666667	0.99539
	WT_TOB 4	21.2	19.28
	WT_TOB 5	22.3	19.68
	WT_TOB 6	22.82	19
	replicat bio 2	22.1067	19.32	2.78667	0.14492			-0.163333	1.11987
	WT_TOB 7	21.88	19.14
	WT_TOB 8	22.04	19.46
	WT_TOB 9	22.22	18.96
	replicat bio 3	22.0467	19.1867	2.86	0.137738			0.08	0.946058
	WT_TOB 10	21.32	18.98
	WT_TOB 11	22.18	19.02
	WT_TOB 12	22.84	18.87
	replicat bio 4	22.1133	18.9567	3.15667	0.112137			0.206667	0.866537
	WT_TOB 13	22.09	19.26
	WT_TOB 14	22.07	19.19
	WT_TOB 15	22.18	19.21
	replicat bio 5	22.1133	19.22	2.89333	0.134592			0.0333333	0.97716
	WT_TOB 16	21.35	18.18
	WT_TOB 17	21.08	18.34
	WT_TOB 18	21.17	18.38
	replicat bio 6	21.2	18.3	2.9	0.133972			0.03	0.97942

## Sheet: WT_MMC vs LB
		Target gene	HKG	ΔCt	2^-ΔCt	2^-ΔCt moy	SD 2^-ΔCt	ΔΔCt	Fold change
		sfiA	dxs						2^-ΔΔCt
Calibrator	WT_LB 1	22.45	19.61
	WT_LB 2	22.29	19.62
	WT_LB 3	22.46	19.63
	replicat bio 1	22.4	19.62	2.78	0.145592
	WT_LB 4	22.23	19.36
	WT_LB 5	22.26	19.46
	WT_LB 6	22.49	19.31
	replicat bio 2	22.3267	19.3767	2.95	0.129408
	WT_LB 7	22.45	19.61
	WT_LB 8	22.29	19.62
	WT_LB 9	22.46	19.63
	replicat bio 3	22.4	19.62	2.78	0.145592
	WT_LB 10	22.23	19.36
	WT_LB 11	22.26	19.46
	WT_LB 12	22.49	19.31
	replicat bio 4	22.3267	19.3767	2.95	0.129408
	WT_LB 13	22.36	19.43
	WT_LB 14	22.38	19.49
	WT_LB 15	22.23	19.34
	replicat bio 5	22.3233	19.42	2.90333	0.133662
	WT_LB 16	22.43	19.47
	WT_LB 17	22.45	19.44
	WT_LB 18	22.22	19.58
	replicat bio 6	22.3667	19.4967	2.87	0.136787
Test 1	WT_MMC 1	19.82	19.54
	WT_MMC 2	19.88	19.34
	WT_MMC 3	19.81	19.52
	replicat bio 1	19.8367	19.4667	0.37	0.773782			-2.41	5.31474
	WT_MMC 4	19.23	19.24
	WT_MMC 5	19.99	19.47
	WT_MMC 6	19.61	19.05
	replicat bio 2	19.61	19.2533	0.356667	0.780967			-2.59333	6.03491
	WT_MMC 7	19.94	19.24
	WT_MMC 8	19.62	19.46
	WT_MMC 9	19.84	19.83
	replicat bio 3	19.8	19.51	0.29	0.817902			-2.49	5.61778
	WT_MMC 7	19.78	19.18
	WT_MMC 8	19.72	19.13
	WT_MMC 9	19.74	19.24
	replicat bio 4	19.7467	19.1833	0.563333	0.676737			-2.38667	5.22948
	WT_MMC 13	18.27	17.98
	WT_MMC 14	18.21	17.77
	WT_MMC 15	18.23	17.66
	replicat bio 5	18.2367	17.8033	0.433333	0.740549			-2.47	5.54044
	WT_MMC 16	19.25	18.84
	WT_MMC 17	19.2	18.87
	WT_MMC 18	19.23	18.77
	replicat bio 6	19.2267	18.8267	0.4	0.757858			-2.47	5.54044

## Sheet: WT_pDIJ_TOB vs LB
		Target gene	HKG	ΔCt	2^-ΔCt	2^-ΔCt moy	SD 2^-ΔCt	ΔΔCt	Fold change
		sfiA	dxs						2^-ΔΔCt
Calibrator	WT/pDIJ_LB 1	20.92	19.65
	WT/pDIJ_LB 2	20.89	19.48
	WT/pDIJ_LB 3	20.92	19.34
	replicat bio 1	20.91	19.49	1.42	0.373712
	WT/pDIJ_LB 4	21.02	19.98
	WT/pDIJ_LB 5	21.09	19.7
	WT/pDIJ_LB 6	20.92	19.65
	replicat bio 2	21.01	19.7767	1.23333	0.425334
	WT/pDIJ_LB 7	20.82	19.32
	WT/pDIJ_LB 8	20.89	19.26
	WT/pDIJ_LB 9	20.915	19.22
	replicat bio 3	20.875	19.2667	1.60833	0.327977
	WT/pDIJ_LB 10	21.34	19.38
	WT/pDIJ_LB 11	20.96	19.65
	WT/pDIJ_LB 12	21	19.36
	replicat bio 4	21.1	19.4633	1.63667	0.321599
	WT/pDIJ_LB 13	21.27	19.4
	WT/pDIJ_LB 14	21.19	19.42
	WT/pDIJ_LB 15	21.2	19.53
	replicat bio 5	21.22	19.45	1.77	0.293209
	WT/pDIJ_LB 16	20.45	19.34
	WT/pDIJ_LB 17	20.67	19.35
	WT/pDIJ_LB 18	20.79	19.22
	replicat bio 6	20.6367	19.3033	1.33333	0.39685
Test 1	WT/pDIJ_TOB 1	20.76	22.06
	WT/pDIJ_TOB 2	20.7	22.05
	WT/pDIJ_TOB 3	20.93	22.71
	replicat bio 1	20.7967	22.2733	-1.47667	2.78305			-2.89667	7.44704
	WT/pDIJ_TOB 4	20.54	22.02
	WT/pDIJ_TOB 5	20.58	22.13
	WT/pDIJ_TOB 6	20.52	22.09
	replicat bio 2	20.5467	22.08	-1.53333	2.89454			-2.76667	6.80534
	WT/pDIJ_TOB 7	21.02	22.3
	WT/pDIJ_TOB 8	21.04	22.48
	WT/pDIJ_TOB 9	21.08	22.34
	replicat bio 3	21.0467	22.3733	-1.32667	2.50822			-2.935	7.64756
	WT/pDIJ_TOB 10	20.76	22.18
	WT/pDIJ_TOB 11	20.72	22.16
	WT/pDIJ_TOB 12	20.94	22.12
	replicat bio 4	20.8067	22.1533	-1.34667	2.54324			-2.98333	7.90811
	WT/pDIJ_TOB 13	20.89	22.04
	WT/pDIJ_TOB 14	21.03	22.08
	WT/pDIJ_TOB 15	20.88	22.06
	replicat bio 5	20.9333	22.06	-1.12667	2.18354			-2.89667	7.44704
	WT/pDIJ_TOB 16	21.42	22.78
	WT/pDIJ_TOB 17	21.38	22.85
	WT/pDIJ_TOB 18	21.32	22.83
	replicat bio 6	21.3733	22.82	-1.44667	2.72578			-2.78	6.86852

## Sheet: WT_pDIJ_MMC vs LB
		Target gene	HKG	ΔCt	2^-ΔCt	2^-ΔCt moy	SD 2^-ΔCt	ΔΔCt	Fold change
		sfiA	dxs						2^-ΔΔCt
Calibrator	WT/pDIJ_LB 1	20.92	19.65
	WT/pDIJ_LB 2	20.89	19.48
	WT/pDIJ_LB 3	20.92	19.34
	replicat bio 1	20.91	19.49	1.42	0.373712
	WT/pDIJ_LB 4	21.02	19.98
	WT/pDIJ_LB 5	21.09	19.7
	WT/pDIJ_LB 6	20.92	19.65
	replicat bio 2	21.01	19.7767	1.23333	0.425334
	WT/pDIJ_LB 7	20.82	19.32
	WT/pDIJ_LB 8	20.89	19.26
	WT/pDIJ_LB 9	20.915	19.22
	replicat bio 3	20.875	19.2667	1.60833	0.327977
	WT/pDIJ_LB 10	21.34	19.38
	WT/pDIJ_LB 11	20.96	19.65
	WT/pDIJ_LB 12	21	19.36
	replicat bio 4	21.1	19.4633	1.63667	0.321599
	WT/pDIJ_LB 13	21.27	22.1
	WT/pDIJ_LB 14	21.19	22.02
	WT/pDIJ_LB 15	21.2	22.03
	replicat bio 5	21.22	22.05	-0.83	1.77769
	WT/pDIJ_LB 16	20.45	21.57
	WT/pDIJ_LB 17	20.67	21.78
	WT/pDIJ_LB 18	20.79	21.78
	replicat bio 6	20.6367	21.71	-1.07333	2.10429
Test 1	WT/pDIJ_MMC 1	19.75	21.02
	WT/pDIJ_MMC 2	19.27	21.1
	WT/pDIJ_MMC 3	19.31	21.14
	replicat bio 1	19.4433	21.0867	-1.64333	3.12387			-3.06333	8.35902
	WT/pDIJ_MMC 4	19.36	20.86
	WT/pDIJ_MMC 5	19.52	20.92
	WT/pDIJ_MMC 6	19.38	20.78
	replicat bio 2	19.42	20.8533	-1.43333	2.7007			-2.66667	6.3496
	WT/pDIJ_MMC 7	19.73	20.88
	WT/pDIJ_MMC 8	19.15	20.82
	WT/pDIJ_MMC 9	19.39	20.89
	replicat bio 3	19.4233	20.8633	-1.44	2.71321			-3.04833	8.27256
	WT/pDIJ_MMC 10	19.48	20.76
	WT/pDIJ_MMC 11	19.52	20.68
	WT/pDIJ_MMC 12	19.32	20.64
	replicat bio 4	19.44	20.6933	-1.25333	2.38392			-2.89	7.4127
	WT/pDIJ_MMC 13	19.09	22.78
	WT/pDIJ_MMC 14	19.02	22.78
	WT/pDIJ_MMC 15	19.02	22.81
	replicat bio 5	19.0433	22.79	-3.74667	13.4233			-2.91667	7.55099
	WT/pDIJ_MMC 16	18.92	23.02
	WT/pDIJ_MMC 17	19.15	22.94
	WT/pDIJ_MMC 18	19.15	22.98
	replicat bio 6	19.0733	22.98	-3.90667	14.9977			-2.83333	7.12719

## Sheet: WT_pDIJ_pTOPO TOB vs LB
		Target gene	HKG	ΔCt	2^-ΔCt	2^-ΔCt moy	SD 2^-ΔCt	ΔΔCt	Fold change
		sfiA	dxs						2^-ΔΔCt
Calibrator	WT/DIJ_pTOPO_LB 1	20.92	19.65
	WT/DIJ_pTOPO_LB 2	20.89	19.48
	WT/DIJ_pTOPO_LB 3	20.92	19.34
	replicat bio 1	20.91	19.49	1.42	0.373712
	WT/DIJ_pTOPO_LB 4	21.02	19.98
	WT/DIJ_pTOPO_LB 5	21.09	19.7
	WT/DIJ_pTOPO_LB 6	20.92	19.65
	replicat bio 2	21.01	19.7767	1.23333	0.425334
	WT/DIJ-pTOPO_LB 7	20.82	19.32
	WT/DIJ-pTOPO_LB 8	20.89	19.26
	WT/DIJ-pTOPO_LB 9	20.915	19.22
	replicat bio 3	20.875	19.2667	1.60833	0.327977
	WT/DIJ_pTOPO_LB 10	21.52	19.38
	WT/DIJ_pTOPO_LB 11	21.46	19.53
	WT/DIJ_pTOPO_LB 12	21.49	19.43
	replicat bio 4	21.49	19.4467	2.04333	0.242603
	WT/DIJ_pTOPO_LB 13	20.99	19.42
	WT/DIJ_pTOPO_LB 14	20.94	19.37
	WT/DIJ_pTOPO_LB 15	21.02	19.45
	replicat bio 5	20.9833	19.4133	1.57	0.336808
	WT/DIJ_pTOPO_LB 16	21.12	19.56
	WT/DIJ_pTOPO_LB 17	21.09	19.34
	WT/DIJ_pTOPO_LB 18	21.08	19.36
	replicat bio 6	21.0967	19.42	1.67667	0.312805
Test 1	WT/DIJ_pTOPO_TOB 1	19.46	19.56
	WT/DIJ_pTOPO_TOB 2	19.59	19.69
	WT/DIJ_pTOPO_TOB 3	19.14	19.65
	replicat bio 1	19.3967	19.6333	-0.236667	1.17827			-1.65667	3.15287
	WT/DIJ_pTOPO_TOB 4	19.45	19.56
	WT/DIJ_pTOPO_TOB 5	19.47	19.68
	WT/DIJ_pTOPO_TOB 6	19.38	19.61
	replicat bio 2	19.4333	19.6167	-0.183333	1.1355			-1.41667	2.66968
	WT/DIJ_pTOPO_TOB 7	19.48	19.62
	WT/DIJ_pTOPO_TOB 8	19.22	19.64
	WT/DIJ_pTOPO_TOB 9	19.38	19.69
	replicat bio 3	19.36	19.65	-0.29	1.22264			-1.89833	3.72782
	WT/DIJ_pTOPO_TOB 10	19.18	19.52
	WT/DIJ_pTOPO_TOB 11	19.25	19.48
	WT/DIJ_pTOPO_TOB 12	19.37	19.27
	replicat bio 4	19.2667	19.4233	-0.156667	1.11471			-2.2	4.59479
	WT/DIJ_pTOPO_TOB 13	19.31	19.52
	WT/DIJ_pTOPO_TOB 14	19.27	19.48
	WT/DIJ_pTOPO_TOB 15	19.32	19.56
	replicat bio 5	19.3	19.52	-0.22	1.16473			-1.79	3.45815
	WT/DIJ_pTOPO_TOB 16	20.63	20.02
	WT/DIJ_pTOPO_TOB 17	19.43	19.97
	WT/DIJ_pTOPO_TOB 18	19.54	19.95
	replicat bio 6	19.8667	19.98	-0.113333	1.08172			-1.79	3.45815

## Sheet: WT_pDORF3_TOB vs LB
		Target gene	HKG	ΔCt	2^-ΔCt	2^-ΔCt moy	SD 2^-ΔCt	ΔΔCt	Fold change
		sfiA	dxs						2^-ΔΔCt
Calibrator	WT/delta orf3 LB_1	20.95	21.69
	WT/delta orf3 LB_2	20.98	21.66
	WT/delta orf3 LB_3	21.03	21.54
	replicat bio 1	20.9867	21.63	-0.643333	1.56193
	WT/delta orf3 LB_4	20.79	22.11
	WT/delta orf3 LB_5	20.75	22.11
	WT/delta orf3 LB_6	20.76	21.97
	replicat bio 2	20.7667	22.0633	-1.29667	2.45661
	WT/delta orf3 LB_7	21.04	22.97
	WT/delta orf3 LB_8	20.95	23.08
	WT/delta orf3 LB_9	20.8	22.93
	replicat bio 3	20.93	22.9933	-2.06333	4.17951
	WT/delta orf3 LB_10	20.82	22.48
	WT/delta orf3 LB_11	20.89	22.37
	WT/delta orf3 LB_12	20.915	22.56
	replicat bio 4	20.875	22.47	-1.595	3.02095
	WT/delta orf3 LB_13	20.89	22.28
	WT/delta orf3 LB_14	20.85	22.24
	WT/delta orf3 LB_15	20.74	22.13
	replicat bio 5	20.8267	22.2167	-1.39	2.62079
	WT/delta orf3 LB_16	20.47	22.48
	WT/delta orf3 LB_17	20.56	22.68
	WT/delta orf3 LB_18	20.46	22.47
	replicat bio 6	20.4967	22.5433	-2.04667	4.1315
Test 1	WT/delta orf3 TOB_1	20.74	21.28
	WT/delta orf3 TOB_2	20.3	21.55
	WT/delta orf3 TOB_3	21.18	21.51
	replicat bio 1	20.74	21.4467	-0.706667	1.63203			-0.0633333	1.04488
	WT/delta orf3 TOB_4	20.55	21.73
	WT/delta orf3 TOB_5	20.54	21.75
	WT/delta orf3 TOB_6	20.49	21.54
	replicat bio 2	20.5267	21.6733	-1.14667	2.21402			0.15	0.90125
	WT/delta orf3 TOB_7	20.49	22.69
	WT/delta orf3 TOB_8	20.81	22.91
	WT/delta orf3 TOB_9	20.59	22.52
	replicat bio 3	20.63	22.7067	-2.07667	4.21831			-0.0133333	1.00928
	WT/delta orf3 TOB_10	21.02	22.62
	WT/delta orf3 TOB_11	20.75	22.54
	WT/delta orf3 TOB_12	20.74	22.78
	replicat bio 4	20.8367	22.6467	-1.81	3.50642			-0.215	1.1607
	WT/delta orf3 TOB_13	20.68	22.11
	WT/delta orf3 TOB_14	20.88	22.31
	WT/delta orf3 TOB_15	20.85	22.26
	replicat bio 5	20.8033	22.2267	-1.42333	2.68204			-0.0333333	1.02337
	WT/delta orf3 TOB_16	20.56	22.56
	WT/delta orf3 TOB_17	20.64	22.46
	WT/delta orf3 TOB_18	20.58	22.49
	replicat bio 6	20.5933	22.5033	-1.91	3.75809			0.136667	0.909618

## Sheet: WT_pDORF3_MMC vs LB
		Target gene	HKG	ΔCt	2^-ΔCt	2^-ΔCt moy	SD 2^-ΔCt	ΔΔCt	Fold change
		sfiA	dxs						2^-ΔΔCt
Calibrator	WT/delta orf3 LB_1	20.95	21.69
	WT/delta orf3 LB_2	20.98	21.66
	WT/delta orf3 LB_3	21.03	21.54
	replicat bio 1	20.9867	21.63	-0.643333	1.56193
	WT/delta orf3 LB_4	20.79	22.11
	WT/delta orf3 LB_5	20.75	22.11
	WT/delta orf3 LB_6	20.76	21.97
	replicat bio 2	20.7667	22.0633	-1.29667	2.45661
	WT/delta orf3 LB_7	21.04	22.97
	WT/delta orf3 LB_8	20.95	23.08
	WT/delta orf3 LB_9	20.8	22.93
	replicat bio 3	20.93	22.9933	-2.06333	4.17951
	WT/delta orf3 LB_10	20.82	22.48
	WT/delta orf3 LB_11	20.89	22.37
	WT/delta orf3 LB_12	20.915	22.56
	replicat bio 4	20.875	22.47	-1.595	3.02095
	WT/delta orf3 LB_13	20.89	22.28
	WT/delta orf3 LB_14	20.85	22.24
	WT/delta orf3 LB_15	20.74	22.13
	replicat bio 5	20.8267	22.2167	-1.39	2.62079
	WT/delta orf3 LB_16	20.47	22.48
	WT/delta orf3 LB_17	20.56	22.68
	WT/delta orf3 LB_18	20.46	22.47
	replicat bio 6	20.4967	22.5433	-2.04667	4.1315
Test 1	WT/delta orf3 MMC_1	17	21.37
	WT/delta orf3 MMC_2	16.77	21.33
	WT/delta orf3 MMC_3	16.88	21.16
	replicat bio 1	16.8833	21.2867	-4.40333	21.161			-3.76	13.5479
	WT/delta orf3 MMC_4	17.2	22.62
	WT/delta orf3 MMC_5	17.6	22.13
	WT/delta orf3 MMC_6	17.45	22.29
	replicat bio 2	17.4167	22.3467	-4.93	30.4844			-3.63333	12.4092
	WT/delta orf3 MMC_7	17.82	22.92
	WT/delta orf3 MMC_8	17.92	22.82
	WT/delta orf3 MMC_9	18.12	22.78
	replicat bio 3	17.9533	22.84	-4.88667	29.5824			-2.82333	7.07796
	WT/delta orf3 MMC_10	17.98	22.62
	WT/delta orf3 MMC_11	18.02	22.54
	WT/delta orf3 MMC_12	18.12	22.78
	replicat bio 4	18.04	22.6467	-4.60667	24.3638			-3.01167	8.06496
	WT/delta orf3 MMC_13	17.96	22.78
	WT/delta orf3 MMC_14	17.96	22.76
	WT/delta orf3 MMC_15	17.99	22.46
	replicat bio 5	17.97	22.6667	-4.69667	25.9321			-3.30667	9.89477
	WT/delta orf3 MMC_16	17.62	22.98
	WT/delta orf3 MMC_17	17.54	22.93
	WT/delta orf3 MMC_18	17.56	22.87
	replicat bio 6	17.5733	22.9267	-5.35333	40.8803			-3.30667	9.89477

## Sheet: WT_pDORF3_pORF3_TOB vs LB
		Target gene	HKG	ΔCt	2^-ΔCt	2^-ΔCt moy	SD 2^-ΔCt	ΔΔCt	Fold change
		sfiA	dxs						2^-ΔΔCt
Calibrator	WT/delta orf3/pORF3_LB_1	23.14	25.11
	WT/delta orf3/pORF3_LB_2	22.96	25.52
	WT/delta orf3/pORF3_LB_3	23.24	25.05
	replicat bio 1	23.1133	25.2267	-2.11333	4.3269
	WT/delta orf3/pORF3_LB_4	22.16	24.91
	WT/delta orf3/pORF3_LB_5	22.14	24.94
	WT/delta orf3/pORF3_LB_6	22.34	24.85
	replicat bio 2	22.2133	24.9	-2.68667	6.43824
	WT/delta orf3/pORF3_LB_7	21.89	24.73
	WT/delta orf3/pORF3_LB_8	21.89	24.52
	WT/delta orf3/pORF3_LB_9	22.01	24.7
	replicat bio 3	21.93	24.65	-2.72	6.58873
	WT/delta orf3/pORF3_LB_10	22.82	24.56
	WT/delta orf3/pORF3_LB_11	22.78	24.53
	WT/delta orf3/pORF3_LB_12	22.56	24.38
	replicat bio 4	22.72	24.49	-1.77	3.41054
	WT/delta orf3/pORF3_LB_13	22.49	24.81
	WT/delta orf3/pORF3_LB_14	22.43	24.75
	WT/delta orf3/pORF3_LB_15	22.42	24.74
	replicat bio 5	22.4467	24.7667	-2.32	4.99332
	WT/delta orf3/pORF3_LB_16	21.95	24.24
	WT/delta orf3/pORF3_LB_17	22.12	24.25
	WT/delta orf3/pORF3_LB_18	22.14	24.56
	replicat bio 6	22.07	24.35	-2.28	4.85678
Test 1	WT/delta orf3/pORF3_ TOB_1	22.34	25.64
	WT/delta orf3/pORF3_ TOB_2	22.85	25.78
	WT/delta orf3/pORF3_ TOB_3	22.86	26.5
	replicat bio 1	22.6833	25.9733	-3.29	9.78112			-1.17667	2.26054
	WT/delta orf3/pORF3_ TOB_4	21.88	25.63
	WT/delta orf3/pORF3_ TOB_5	22.03	25.7
	WT/delta orf3/pORF3_ TOB_6	21.66	25.53
	replicat bio 2	21.8567	25.62	-3.76333	13.5793			-1.07667	2.10916
	WT/delta orf3/pORF3_ TOB_7	21.68	25.64
	WT/delta orf3/pORF3_ TOB_8	21.56	25.32
	WT/delta orf3/pORF3_ TOB_9	21.62	25.09
	replicat bio 3	21.62	25.35	-3.73	13.2691			-1.01	2.01391
	WT/delta orf3/pORF3_ TOB_10	21.62	25.48
	WT/delta orf3/pORF3_ TOB_11	21.58	25.82
	WT/delta orf3/pORF3_ TOB_12	21.45	25.38
	replicat bio 4	21.55	25.56	-4.01	16.1113			-2.24	4.72397
	WT/delta orf3/pORF3_ TOB_13	21.93	25.62
	WT/delta orf3/pORF3_ TOB_14	21.92	25.61
	WT/delta orf3/pORF3_ TOB_15	21.77	25.48
	replicat bio 5	21.8733	25.57	-3.69667	12.966			-1.37667	2.59668
	WT/delta orf3/pORF3_ TOB_16	20.88	25.24
	WT/delta orf3/pORF3_ TOB_17	20.61	25.19
	WT/delta orf3/pORF3_ TOB_18	20.66	25.27
	replicat bio 6	20.7167	25.2333	-4.51667	22.8903			-2.23667	4.71307

## Sheet: WT_pDORF3_pORF3_MMC vs LB
		Target gene	HKG	ΔCt	2^-ΔCt	2^-ΔCt moy	SD 2^-ΔCt	ΔΔCt	Fold change
		sfiA	dxs						2^-ΔΔCt
Calibrator	WT/delta orf3/pORF3_LB_1	23.14	25.11
	WT/delta orf3/pORF3_LB_2	22.96	25.52
	WT/delta orf3/pORF3_LB_3	23.24	25.05
	replicat bio 1	23.1133	25.2267	-2.11333	4.3269
	WT/delta orf3/pORF3_LB_4	22.16	24.91
	WT/delta orf3/pORF3_LB_5	22.14	24.94
	WT/delta orf3/pORF3_LB_6	22.34	24.85
	replicat bio 2	22.2133	24.9	-2.68667	6.43824
	WT/delta orf3/pORF3_LB_7	21.89	24.73
	WT/delta orf3/pORF3_LB_8	21.89	24.52
	WT/delta orf3/pORF3_LB_9	22.01	24.7
	replicat bio 3	21.93	24.65	-2.72	6.58873
	WT/delta orf3/pORF3_LB_10	22.82	24.56
	WT/delta orf3/pORF3_LB_11	22.78	24.53
	WT/delta orf3/pORF3_LB_12	22.56	24.38
	replicat bio 4	22.72	24.49	-1.77	3.41054
	WT/delta orf3/pORF3_LB_13	22.49	24.81
	WT/delta orf3/pORF3_LB_14	22.43	24.75
	WT/delta orf3/pORF3_LB_15	22.42	24.74
	replicat bio 5	22.4467	24.7667	-2.32	4.99332
	WT/delta orf3/pORF3_LB_16	21.95	24.24
	WT/delta orf3/pORF3_LB_17	22.12	24.25
	WT/delta orf3/pORF3_LB_18	22.14	24.56
	replicat bio 6	22.07	24.35	-2.28	4.85678
Test 1	WT/delta orf3/pORF3_ MMC_1	21.86	26.82
	WT/delta orf3/pORF3_ MMC_2	21.59	26.54
	WT/delta orf3/pORF3_ MMC_3	21.72	26.27
	replicat bio 1	21.7233	26.5433	-4.82	28.2465			-2.70667	6.52812
	WT/delta orf3/pORF3_ MMC_4	20.81	25.77
	WT/delta orf3/pORF3_ MMC_5	20.14	25.64
	WT/delta orf3/pORF3_ MMC_6	19.76	25.61
	replicat bio 2	20.2367	25.6733	-5.43667	43.3112			-2.75	6.72717
	WT/delta orf3/pORF3_ MMC_7	17.49	23
	WT/delta orf3/pORF3_ MMC_8	17.8	22.87
	WT/delta orf3/pORF3_ MMC_9	17.49	23.14
	replicat bio 3	17.5933	23.0033	-5.41	42.5179			-2.69	6.45313
	WT/delta orf3/pORF3_ MMC_10	20.39	25.48
	WT/delta orf3/pORF3_ MMC_11	20.84	25.82
	WT/delta orf3/pORF3_ MMC_12	20.76	25.38
	replicat bio 4	20.6633	25.56	-4.89667	29.7882			-3.12667	8.73415
	WT/delta orf3/pORF3_ MMC_13	20.05	25.19
	WT/delta orf3/pORF3_ MMC_14	20.03	25.17
	WT/delta orf3/pORF3_ MMC_15	19.88	25.02
	replicat bio 5	19.9867	25.1267	-5.14	35.261			-2.82	7.06162
	WT/delta orf3/pORF3_ MMC_16	19.94	25.12
	WT/delta orf3/pORF3_ MMC_17	19.94	25.11
	WT/delta orf3/pORF3_ MMC_18	20.23	25.17
	replicat bio 6	20.0367	25.1333	-5.09667	34.2176			-2.81667	7.04533
