# Supplementary material for: A qnr-plasmid allows aminoglycosides to induce SOS in Escherichia coli
Source: eLife. 2022 Jan 17;11:e69511. doi: 10.7554/eLife.69511 (PMC8789287; doi:10.7554/eLife.69511)
Supplement: Figure 5—source data 2. [file elife-69511-fig5-data2.xlsx]

## Sheet: WT_TOB vs LB
		Target gene	HKG	ΔCt	2^-ΔCt	2^-ΔCt moy	SD 2^-ΔCt	ΔΔCt	Fold change
		sfiA	dxs						2^-ΔΔCt
Calibrator	WT_LB 1	22.45	19.61
	WT_LB 2	22.29	19.62
	WT_LB 3	22.46	19.63
	replicat bio 1	22.4	19.62	2.78	0.145592
	WT_LB 4	22.23	19.36
	WT_LB 5	22.26	19.46
	WT_LB 6	22.49	19.31
	replicat bio 2	22.3267	19.3767	2.95	0.129408
	WT_LB 7	22.45	19.61
	WT_LB 8	22.29	19.62
	WT_LB 9	22.46	19.63
	replicat bio 3	22.4	19.62	2.78	0.145592
	WT_LB 10	22.23	19.36
	WT_LB 11	22.26	19.46
	WT_LB 12	22.49	19.31
	replicat bio 4	22.3267	19.3767	2.95	0.129408
	WT_LB 13	22.36	19.43
	WT_LB 14	22.38	19.54
	WT_LB 15	22.23	19.42
	replicat bio 5	22.3233	19.4633	2.86	0.137738
	WT_LB 16	22.43	19.47
	WT_LB 17	22.45	19.44
	WT_LB 18	22.22	19.58
	replicat bio 6	22.3667	19.4967	2.87	0.136787
Test 1	WT_TOB 1	21.98	19.22
	WT_TOB 2	22.04	19.44
	WT_TOB 3	22.32	19.32
	replicat bio 1	22.1133	19.3267	2.78667	0.14492			0.00666667	0.99539
	WT_TOB 4	21.2	19.28
	WT_TOB 5	22.3	19.68
	WT_TOB 6	22.82	19
	replicat bio 2	22.1067	19.32	2.78667	0.14492			-0.163333	1.11987
	WT_TOB 7	21.88	19.14
	WT_TOB 8	22.04	19.46
	WT_TOB 9	22.22	18.96
	replicat bio 3	22.0467	19.1867	2.86	0.137738			0.08	0.946058
	WT_TOB 10	21.32	18.98
	WT_TOB 11	22.18	19.02
	WT_TOB 12	22.84	18.87
	replicat bio 4	22.1133	18.9567	3.15667	0.112137			0.206667	0.866537
	WT_TOB 13	22.09	19.26
	WT_TOB 14	22.07	19.19
	WT_TOB 15	22.18	19.21
	replicat bio 5	22.1133	19.22	2.89333	0.134592			0.0333333	0.97716
	WT_TOB 16	21.35	18.18
	WT_TOB 17	21.08	18.34
	WT_TOB 18	21.17	18.38
	replicat bio 6	21.2	18.3	2.9	0.133972			0.03	0.97942

## Sheet: WT_MMC vs LB
		Target gene	HKG	ΔCt	2^-ΔCt	2^-ΔCt moy	SD 2^-ΔCt	ΔΔCt	Fold change
		sfiA	dxs						2^-ΔΔCt
Calibrator	WT_LB 1	22.45	19.61
	WT_LB 2	22.29	19.62
	WT_LB 3	22.46	19.63
	replicat bio 1	22.4	19.62	2.78	0.145592
	WT_LB 4	22.23	19.36
	WT_LB 5	22.26	19.46
	WT_LB 6	22.49	19.31
	replicat bio 2	22.3267	19.3767	2.95	0.129408
	WT_LB 7	22.45	19.61
	WT_LB 8	22.29	19.62
	WT_LB 9	22.46	19.63
	replicat bio 3	22.4	19.62	2.78	0.145592
	WT_LB 10	22.23	19.36
	WT_LB 11	22.26	19.46
	WT_LB 12	22.49	19.31
	replicat bio 4	22.3267	19.3767	2.95	0.129408
	WT_LB 13	22.36	19.43
	WT_LB 14	22.38	19.49
	WT_LB 15	22.23	19.34
	replicat bio 5	22.3233	19.42	2.90333	0.133662
	WT_LB 16	22.43	19.47
	WT_LB 17	22.45	19.44
	WT_LB 18	22.22	19.58
	replicat bio 6	22.3667	19.4967	2.87	0.136787
Test 1	WT_MMC 1	19.82	19.54
	WT_MMC 2	19.88	19.34
	WT_MMC 3	19.81	19.52
	replicat bio 1	19.8367	19.4667	0.37	0.773782			-2.41	5.31474
	WT_MMC 4	19.23	19.24
	WT_MMC 5	19.99	19.47
	WT_MMC 6	19.61	19.05
	replicat bio 2	19.61	19.2533	0.356667	0.780967			-2.59333	6.03491
	WT_MMC 7	19.94	19.24
	WT_MMC 8	19.62	19.46
	WT_MMC 9	19.84	19.83
	replicat bio 3	19.8	19.51	0.29	0.817902			-2.49	5.61778
	WT_MMC 7	19.78	19.18
	WT_MMC 8	19.72	19.13
	WT_MMC 9	19.74	19.24
	replicat bio 4	19.7467	19.1833	0.563333	0.676737			-2.38667	5.22948
	WT_MMC 13	18.27	17.98
	WT_MMC 14	18.21	17.77
	WT_MMC 15	18.23	17.66
	replicat bio 5	18.2367	17.8033	0.433333	0.740549			-2.47	5.54044
	WT_MMC 16	19.25	18.84
	WT_MMC 17	19.2	18.87
	WT_MMC 18	19.23	18.77
	replicat bio 6	19.2267	18.8267	0.4	0.757858			-2.47	5.54044

## Sheet: WT_pDIJ_TOB vs LB
		Target gene	HKG	ΔCt	2^-ΔCt	2^-ΔCt moy	SD 2^-ΔCt	ΔΔCt	Fold change
		sfiA	dxs						2^-ΔΔCt
Calibrator	WT/pDIJ_LB 1	20.92	19.65
	WT/pDIJ_LB 2	20.89	19.48
	WT/pDIJ_LB 3	20.92	19.34
	replicat bio 1	20.91	19.49	1.42	0.373712
	WT/pDIJ_LB 4	21.02	19.98
	WT/pDIJ_LB 5	21.09	19.7
	WT/pDIJ_LB 6	20.92	19.65
	replicat bio 2	21.01	19.7767	1.23333	0.425334
	WT/pDIJ_LB 7	20.82	19.32
	WT/pDIJ_LB 8	20.89	19.26
	WT/pDIJ_LB 9	20.915	19.22
	replicat bio 3	20.875	19.2667	1.60833	0.327977
	WT/pDIJ_LB 10	21.34	19.38
	WT/pDIJ_LB 11	20.96	19.65
	WT/pDIJ_LB 12	21	19.36
	replicat bio 4	21.1	19.4633	1.63667	0.321599
	WT/pDIJ_LB 13	21.27	19.4
	WT/pDIJ_LB 14	21.19	19.42
	WT/pDIJ_LB 15	21.2	19.53
	replicat bio 5	21.22	19.45	1.77	0.293209
	WT/pDIJ_LB 16	20.45	19.34
	WT/pDIJ_LB 17	20.67	19.35
	WT/pDIJ_LB 18	20.79	19.22
	replicat bio 6	20.6367	19.3033	1.33333	0.39685
Test 1	WT/pDIJ_TOB 1	20.76	22.06
	WT/pDIJ_TOB 2	20.7	22.05
	WT/pDIJ_TOB 3	20.93	22.71
	replicat bio 1	20.7967	22.2733	-1.47667	2.78305			-2.89667	7.44704
	WT/pDIJ_TOB 4	20.54	22.02
	WT/pDIJ_TOB 5	20.58	22.13
	WT/pDIJ_TOB 6	20.52	22.09
	replicat bio 2	20.5467	22.08	-1.53333	2.89454			-2.76667	6.80534
	WT/pDIJ_TOB 7	21.02	22.3
	WT/pDIJ_TOB 8	21.04	22.48
	WT/pDIJ_TOB 9	21.08	22.34
	replicat bio 3	21.0467	22.3733	-1.32667	2.50822			-2.935	7.64756
	WT/pDIJ_TOB 10	20.76	22.18
	WT/pDIJ_TOB 11	20.72	22.16
	WT/pDIJ_TOB 12	20.94	22.12
	replicat bio 4	20.8067	22.1533	-1.34667	2.54324			-2.98333	7.90811
	WT/pDIJ_TOB 13	20.89	22.04
	WT/pDIJ_TOB 14	21.03	22.08
	WT/pDIJ_TOB 15	20.88	22.06
	replicat bio 5	20.9333	22.06	-1.12667	2.18354			-2.89667	7.44704
	WT/pDIJ_TOB 16	21.42	22.78
	WT/pDIJ_TOB 17	21.38	22.85
	WT/pDIJ_TOB 18	21.32	22.83
	replicat bio 6	21.3733	22.82	-1.44667	2.72578			-2.78	6.86852

## Sheet: WT_pDIJ_MMC vs LB
		Target gene	HKG	ΔCt	2^-ΔCt	2^-ΔCt moy	SD 2^-ΔCt	ΔΔCt	Fold change
		sfiA	dxs						2^-ΔΔCt
Calibrator	WT/pDIJ_LB 1	20.92	19.65
	WT/pDIJ_LB 2	20.89	19.48
	WT/pDIJ_LB 3	20.92	19.34
	replicat bio 1	20.91	19.49	1.42	0.373712
	WT/pDIJ_LB 4	21.02	19.98
	WT/pDIJ_LB 5	21.09	19.7
	WT/pDIJ_LB 6	20.92	19.65
	replicat bio 2	21.01	19.7767	1.23333	0.425334
	WT/pDIJ_LB 7	20.82	19.32
	WT/pDIJ_LB 8	20.89	19.26
	WT/pDIJ_LB 9	20.915	19.22
	replicat bio 3	20.875	19.2667	1.60833	0.327977
	WT/pDIJ_LB 10	21.34	19.38
	WT/pDIJ_LB 11	20.96	19.65
	WT/pDIJ_LB 12	21	19.36
	replicat bio 4	21.1	19.4633	1.63667	0.321599
	WT/pDIJ_LB 13	21.27	22.1
	WT/pDIJ_LB 14	21.19	22.02
	WT/pDIJ_LB 15	21.2	22.03
	replicat bio 5	21.22	22.05	-0.83	1.77769
	WT/pDIJ_LB 16	20.45	21.57
	WT/pDIJ_LB 17	20.67	21.78
	WT/pDIJ_LB 18	20.79	21.78
	replicat bio 6	20.6367	21.71	-1.07333	2.10429
Test 1	WT/pDIJ_MMC 1	19.75	21.02
	WT/pDIJ_MMC 2	19.27	21.1
	WT/pDIJ_MMC 3	19.31	21.14
	replicat bio 1	19.4433	21.0867	-1.64333	3.12387			-3.06333	8.35902
	WT/pDIJ_MMC 4	19.36	20.86
	WT/pDIJ_MMC 5	19.52	20.92
	WT/pDIJ_MMC 6	19.38	20.78
	replicat bio 2	19.42	20.8533	-1.43333	2.7007			-2.66667	6.3496
	WT/pDIJ_MMC 7	19.73	20.88
	WT/pDIJ_MMC 8	19.15	20.82
	WT/pDIJ_MMC 9	19.39	20.89
	replicat bio 3	19.4233	20.8633	-1.44	2.71321			-3.04833	8.27256
	WT/pDIJ_MMC 10	19.48	20.76
	WT/pDIJ_MMC 11	19.52	20.68
	WT/pDIJ_MMC 12	19.32	20.64
	replicat bio 4	19.44	20.6933	-1.25333	2.38392			-2.89	7.4127
	WT/pDIJ_MMC 13	19.09	22.78
	WT/pDIJ_MMC 14	19.02	22.78
	WT/pDIJ_MMC 15	19.02	22.81
	replicat bio 5	19.0433	22.79	-3.74667	13.4233			-2.91667	7.55099
	WT/pDIJ_MMC 16	18.92	23.02
	WT/pDIJ_MMC 17	19.15	22.94
	WT/pDIJ_MMC 18	19.15	22.98
	replicat bio 6	19.0733	22.98	-3.90667	14.9977			-2.83333	7.12719

## Sheet: WT_pDIJ_pTOPO TOB vs LB
		Target gene	HKG	ΔCt	2^-ΔCt	2^-ΔCt moy	SD 2^-ΔCt	ΔΔCt	Fold change
		sfiA	dxs						2^-ΔΔCt
Calibrator	WT/DIJ_pTOPO_LB 1	20.92	19.65
	WT/DIJ_pTOPO_LB 2	20.89	19.48
	WT/DIJ_pTOPO_LB 3	20.92	19.34
	replicat bio 1	20.91	19.49	1.42	0.373712
	WT/DIJ_pTOPO_LB 4	21.02	19.98
	WT/DIJ_pTOPO_LB 5	21.09	19.7
	WT/DIJ_pTOPO_LB 6	20.92	19.65
	replicat bio 2	21.01	19.7767	1.23333	0.425334
	WT/DIJ-pTOPO_LB 7	20.82	19.32
	WT/DIJ-pTOPO_LB 8	20.89	19.26
	WT/DIJ-pTOPO_LB 9	20.915	19.22
	replicat bio 3	20.875	19.2667	1.60833	0.327977
	WT/DIJ_pTOPO_LB 10	21.52	19.38
	WT/DIJ_pTOPO_LB 11	21.46	19.53
	WT/DIJ_pTOPO_LB 12	21.49	19.43
	replicat bio 4	21.49	19.4467	2.04333	0.242603
	WT/DIJ_pTOPO_LB 13	20.99	19.42
	WT/DIJ_pTOPO_LB 14	20.94	19.37
	WT/DIJ_pTOPO_LB 15	21.02	19.45
	replicat bio 5	20.9833	19.4133	1.57	0.336808
	WT/DIJ_pTOPO_LB 16	21.12	19.56
	WT/DIJ_pTOPO_LB 17	21.09	19.34
	WT/DIJ_pTOPO_LB 18	21.08	19.36
	replicat bio 6	21.0967	19.42	1.67667	0.312805
Test 1	WT/DIJ_pTOPO_TOB 1	19.46	19.56
	WT/DIJ_pTOPO_TOB 2	19.59	19.69
	WT/DIJ_pTOPO_TOB 3	19.14	19.65
	replicat bio 1	19.3967	19.6333	-0.236667	1.17827			-1.65667	3.15287
	WT/DIJ_pTOPO_TOB 4	19.45	19.56
	WT/DIJ_pTOPO_TOB 5	19.47	19.68
	WT/DIJ_pTOPO_TOB 6	19.38	19.61
	replicat bio 2	19.4333	19.6167	-0.183333	1.1355			-1.41667	2.66968
	WT/DIJ_pTOPO_TOB 7	19.48	19.62
	WT/DIJ_pTOPO_TOB 8	19.22	19.64
	WT/DIJ_pTOPO_TOB 9	19.38	19.69
	replicat bio 3	19.36	19.65	-0.29	1.22264			-1.89833	3.72782
	WT/DIJ_pTOPO_TOB 10	19.18	19.52
	WT/DIJ_pTOPO_TOB 11	19.25	19.48
	WT/DIJ_pTOPO_TOB 12	19.37	19.27
	replicat bio 4	19.2667	19.4233	-0.156667	1.11471			-2.2	4.59479
	WT/DIJ_pTOPO_TOB 13	19.31	19.52
	WT/DIJ_pTOPO_TOB 14	19.27	19.48
	WT/DIJ_pTOPO_TOB 15	19.32	19.56
	replicat bio 5	19.3	19.52	-0.22	1.16473			-1.79	3.45815
	WT/DIJ_pTOPO_TOB 16	20.63	20.02
	WT/DIJ_pTOPO_TOB 17	19.43	19.97
	WT/DIJ_pTOPO_TOB 18	19.54	19.95
	replicat bio 6	19.8667	19.98	-0.113333	1.08172			-1.79	3.45815

## Sheet: WT_pDORF3_pDORF4_TOB vs LB
		Target gene	HKG	ΔCt	2^-ΔCt	2^-ΔCt moy	SD 2^-ΔCt	ΔΔCt	Fold change
		sfiA	dxs						2^-ΔΔCt
Calibrator	WT/ΔORF3ΔORF4_LB 1	23.01	22.77
	WT/ΔORF3ΔORF4_LB 2	23.12	22.67
	WT/ΔORF3ΔORF4_LB 3	22.82	22.71
	replicat bio 1	22.9833	22.7167	0.266667	0.831238
	WT/ΔORF3ΔORF4_LB 4	22.13	22.68
	WT/ΔORF3ΔORF4_LB 5	21.92	22.98
	WT/ΔORF3ΔORF4_LB 6	21.89	22.79
	replicat bio 2	21.98	22.8167	-0.836667	1.78592
	WT/ΔORF3ΔORF4_LB 7	22.34	22.95
	WT/ΔORF3ΔORF4_LB 8	22.3	22.93
	WT/ΔORF3ΔORF4_LB 9	22.31	22.95
	replicat bio 3	22.3167	22.9433	-0.626667	1.54399
	WT/ΔORF3ΔORF4_LB 10	22.82	23.48
	WT/ΔORF3ΔORF4_LB 11	22.72	23.37
	WT/ΔORF3ΔORF4_LB 12	22.56	23.56
	replicat bio 4	22.7	23.47	-0.77	1.70527
	WT/ΔORF3ΔORF4_LB 13	22.49	22.98
	WT/ΔORF3ΔORF4_LB 14	22.38	23.02
	WT/ΔORF3ΔORF4_LB 15	22.43	23.02
	replicat bio 5	22.4333	23.0067	-0.573333	1.48796
	WT/ΔORF3ΔORF4_LB 16	22.34	22.96
	WT/ΔORF3ΔORF4_LB 17	22.24	22.91
	WT/ΔORF3ΔORF4_LB 18	22.45	22.87
	replicat bio 6	22.3433	22.9133	-0.57	1.48452
Test 1	WT/ΔORF3ΔORF4_TOB 1	21.94	21.93
	WT/ΔORF3ΔORF4_TOB 2	21.92	22.06
	WT/ΔORF3ΔORF4_TOB 3	21.8	22.01
	replicat bio 1	21.8867	22	-0.113333	1.08172			-0.38	1.30134
	WT/ΔORF3ΔORF4_TOB 4	21.71	21.99
	WT/ΔORF3ΔORF4_TOB 5	21.61	21.86
	WT/ΔORF3ΔORF4_TOB 6	21.58	21.68
	replicat bio 2	21.6333	21.8433	-0.21	1.15669			0.626667	0.647671
	WT/ΔORF3ΔORF4_TOB 7	22.06	22.76
	WT/ΔORF3ΔORF4_TOB 8	21.85	22.67
	WT/ΔORF3ΔORF4_TOB 9	21.65	22.76
	replicat bio 3	21.8533	22.73	-0.876667	1.83613			-0.25	1.18921
	WT/ΔORF3ΔORF4_TOB 10	22.62	23.42
	WT/ΔORF3ΔORF4_TOB 11	22.54	23.36
	WT/ΔORF3ΔORF4_TOB 12	22.78	23.64
	replicat bio 4	22.6467	23.4733	-0.826667	1.77358			-0.0566667	1.04006
	WT/ΔORF3ΔORF4_TOB 13	22.32	22.08
	WT/ΔORF3ΔORF4_TOB 14	22.18	22.21
	WT/ΔORF3ΔORF4_TOB 15	22.24	22.28
	replicat bio 5	22.2467	22.19	0.0566667	0.961483			0.63	0.646176
	WT/ΔORF3ΔORF4_TOB 16	22.34	22.56
	WT/ΔORF3ΔORF4_TOB 17	22.12	22.94
	WT/ΔORF3ΔORF4_TOB 18	22.13	22.84
	replicat bio 6	22.1967	22.78	-0.583333	1.49831			-0.0133333	1.00928

## Sheet: WT_pDORF3_pDORF4_MMC vs LB
		Target gene	HKG	ΔCt	2^-ΔCt	2^-ΔCt moy	SD 2^-ΔCt	ΔΔCt	Fold change
		sfiA	dxs						2^-ΔΔCt
Calibrator	WT/ΔORF3ΔORF4_LB 1	23.01	22.77
	WT/ΔORF3ΔORF4_LB 2	23.12	22.67
	WT/ΔORF3ΔORF4_LB 3	22.82	22.71
	replicat bio 1	22.9833	22.7167	0.266667	0.831238
	WT/ΔORF3ΔORF4_LB 4	22.13	22.68
	WT/ΔORF3ΔORF4_LB 5	21.92	22.98
	WT/ΔORF3ΔORF4_LB 6	21.89	22.79
	replicat bio 2	21.98	22.8167	-0.836667	1.78592
	WT/ΔORF3ΔORF4_LB 7	22.34	22.95
	WT/ΔORF3ΔORF4_LB 8	22.3	22.93
	WT/ΔORF3ΔORF4_LB 9	22.31	22.95
	replicat bio 3	22.3167	22.9433	-0.626667	1.54399
	WT/ΔORF3ΔORF4_LB 10	22.82	23.48
	WT/ΔORF3ΔORF4_LB 11	22.72	23.37
	WT/ΔORF3ΔORF4_LB 12	22.56	23.56
	replicat bio 4	22.7	23.47	-0.77	1.70527
	WT/ΔORF3ΔORF4_LB 13	22.49	22.98
	WT/ΔORF3ΔORF4_LB 14	22.38	23.02
	WT/ΔORF3ΔORF4_LB 15	22.43	23.02
	replicat bio 5	22.4333	23.0067	-0.573333	1.48796
	WT/ΔORF3ΔORF4_LB 16	22.34	22.96
	WT/ΔORF3ΔORF4_LB 17	22.24	22.91
	WT/ΔORF3ΔORF4_LB 18	22.45	22.87
	replicat bio 6	22.3433	22.9133	-0.57	1.48452
Test 1	WT/ΔORF3ΔORF4_MMC 1	21.15	22.22
	WT/ΔORF3ΔORF4_MMC 2	21.31	22.42
	WT/ΔORF3ΔORF4_MMC 3	21.03	22.36
	replicat bio 1	21.1633	22.3333	-1.17	2.25012			-1.43667	2.70695
	WT/ΔORF3ΔORF4_MMC 4	18.72	21.93
	WT/ΔORF3ΔORF4_MMC 5	18.79	21.96
	WT/ΔORF3ΔORF4_MMC 6	18.51	21.91
	replicat bio 2	18.6733	21.9333	-3.26	9.57983			-2.42333	5.36409
	WT/ΔORF3ΔORF4_MMC 7	19.19	22.45
	WT/ΔORF3ΔORF4_MMC 8	19.62	22.15
	WT/ΔORF3ΔORF4_MMC 9	19.55	22.22
	replicat bio 3	19.4533	22.2733	-2.82	7.06162			-2.19333	4.57361
	WT/ΔORF3ΔORF4_MMC 10	19.45	22.58
	WT/ΔORF3ΔORF4_MMC 11	20.05	22.35
	WT/ΔORF3ΔORF4_MMC 12	20.22	22.78
	replicat bio 4	19.9067	22.57	-2.66333	6.33495			-1.89333	3.71493
	WT/ΔORF3ΔORF4_MMC 13	19.22	21.78
	WT/ΔORF3ΔORF4_MMC 14	19.21	21.76
	WT/ΔORF3ΔORF4_MMC 15	19.34	21.91
	replicat bio 5	19.2567	21.8167	-2.56	5.89708			-1.98667	3.9632
	WT/ΔORF3ΔORF4_MMC 16	19.34	22.38
	WT/ΔORF3ΔORF4_MMC 17	19.44	22.28
	WT/ΔORF3ΔORF4_MMC 18	19.37	22.47
	replicat bio 6	19.3833	22.3767	-2.99333	7.96312			-2.42333	5.36409
