# Supplementary material for: A qnr-plasmid allows aminoglycosides to induce SOS in Escherichia coli
Source: eLife. 2022 Jan 17;11:e69511. doi: 10.7554/eLife.69511 (PMC8789287; doi:10.7554/eLife.69511)
Supplement: Figure 5—source data 3. [file elife-69511-fig5-data3.xlsx]

## Sheet: WT_TOB vs LB
		Target gene	HKG	ΔCt	2^-ΔCt	2^-ΔCt moy	SD 2^-ΔCt	ΔΔCt	Fold change
		sfiA	dxs						2^-ΔΔCt
Calibrator	WT_LB 1	22.45	19.61
	WT_LB 2	22.29	19.62
	WT_LB 3	22.46	19.63
	replicat bio 1	22.4	19.62	2.78	0.145592
	WT_LB 4	22.23	19.36
	WT_LB 5	22.26	19.46
	WT_LB 6	22.49	19.31
	replicat bio 2	22.3267	19.3767	2.95	0.129408
	WT_LB 7	22.45	19.61
	WT_LB 8	22.29	19.62
	WT_LB 9	22.46	19.63
	replicat bio 3	22.4	19.62	2.78	0.145592
	WT_LB 10	22.23	19.36
	WT_LB 11	22.26	19.46
	WT_LB 12	22.49	19.31
	replicat bio 4	22.3267	19.3767	2.95	0.129408
	WT_LB 13	22.36	19.43
	WT_LB 14	22.38	19.54
	WT_LB 15	22.23	19.42
	replicat bio 5	22.3233	19.4633	2.86	0.137738
	WT_LB 16	22.43	19.47
	WT_LB 17	22.45	19.44
	WT_LB 18	22.22	19.58
	replicat bio 6	22.3667	19.4967	2.87	0.136787
Test 1	WT_TOB 1	21.98	19.22
	WT_TOB 2	22.04	19.44
	WT_TOB 3	22.32	19.32
	replicat bio 1	22.1133	19.3267	2.78667	0.14492			0.00666667	0.99539
	WT_TOB 4	21.2	19.28
	WT_TOB 5	22.3	19.68
	WT_TOB 6	22.82	19
	replicat bio 2	22.1067	19.32	2.78667	0.14492			-0.163333	1.11987
	WT_TOB 7	21.88	19.14
	WT_TOB 8	22.04	19.46
	WT_TOB 9	22.22	18.96
	replicat bio 3	22.0467	19.1867	2.86	0.137738			0.08	0.946058
	WT_TOB 10	21.32	18.98
	WT_TOB 11	22.18	19.02
	WT_TOB 12	22.84	18.87
	replicat bio 4	22.1133	18.9567	3.15667	0.112137			0.206667	0.866537
	WT_TOB 13	22.09	19.26
	WT_TOB 14	22.07	19.19
	WT_TOB 15	22.18	19.21
	replicat bio 5	22.1133	19.22	2.89333	0.134592			0.0333333	0.97716
	WT_TOB 16	21.35	18.18
	WT_TOB 17	21.08	18.34
	WT_TOB 18	21.17	18.38
	replicat bio 6	21.2	18.3	2.9	0.133972			0.03	0.97942

## Sheet: WT_MMC vs LB
		Target gene	HKG	ΔCt	2^-ΔCt	2^-ΔCt moy	SD 2^-ΔCt	ΔΔCt	Fold change
		sfiA	dxs						2^-ΔΔCt
Calibrator	WT_LB 1	22.45	19.61
	WT_LB 2	22.29	19.62
	WT_LB 3	22.46	19.63
	replicat bio 1	22.4	19.62	2.78	0.145592
	WT_LB 4	22.23	19.36
	WT_LB 5	22.26	19.46
	WT_LB 6	22.49	19.31
	replicat bio 2	22.3267	19.3767	2.95	0.129408
	WT_LB 7	22.45	19.61
	WT_LB 8	22.29	19.62
	WT_LB 9	22.46	19.63
	replicat bio 3	22.4	19.62	2.78	0.145592
	WT_LB 10	22.23	19.36
	WT_LB 11	22.26	19.46
	WT_LB 12	22.49	19.31
	replicat bio 4	22.3267	19.3767	2.95	0.129408
	WT_LB 13	22.36	19.43
	WT_LB 14	22.38	19.49
	WT_LB 15	22.23	19.34
	replicat bio 5	22.3233	19.42	2.90333	0.133662
	WT_LB 16	22.43	19.47
	WT_LB 17	22.45	19.44
	WT_LB 18	22.22	19.58
	replicat bio 6	22.3667	19.4967	2.87	0.136787
Test 1	WT_MMC 1	19.82	19.54
	WT_MMC 2	19.88	19.34
	WT_MMC 3	19.81	19.52
	replicat bio 1	19.8367	19.4667	0.37	0.773782			-2.41	5.31474
	WT_MMC 4	19.23	19.24
	WT_MMC 5	19.99	19.47
	WT_MMC 6	19.61	19.05
	replicat bio 2	19.61	19.2533	0.356667	0.780967			-2.59333	6.03491
	WT_MMC 7	19.94	19.24
	WT_MMC 8	19.62	19.46
	WT_MMC 9	19.84	19.83
	replicat bio 3	19.8	19.51	0.29	0.817902			-2.49	5.61778
	WT_MMC 7	19.78	19.18
	WT_MMC 8	19.72	19.13
	WT_MMC 9	19.74	19.24
	replicat bio 4	19.7467	19.1833	0.563333	0.676737			-2.38667	5.22948
	WT_MMC 13	18.27	17.98
	WT_MMC 14	18.21	17.77
	WT_MMC 15	18.23	17.66
	replicat bio 5	18.2367	17.8033	0.433333	0.740549			-2.47	5.54044
	WT_MMC 16	19.25	18.84
	WT_MMC 17	19.2	18.87
	WT_MMC 18	19.23	18.77
	replicat bio 6	19.2267	18.8267	0.4	0.757858			-2.47	5.54044

## Sheet: WT_pDIJ_TOB vs LB
		Target gene	HKG	ΔCt	2^-ΔCt	2^-ΔCt moy	SD 2^-ΔCt	ΔΔCt	Fold change
		sfiA	dxs						2^-ΔΔCt
Calibrator	WT/pDIJ_LB 1	20.92	19.65
	WT/pDIJ_LB 2	20.89	19.48
	WT/pDIJ_LB 3	20.92	19.34
	replicat bio 1	20.91	19.49	1.42	0.373712
	WT/pDIJ_LB 4	21.02	19.98
	WT/pDIJ_LB 5	21.09	19.7
	WT/pDIJ_LB 6	20.92	19.65
	replicat bio 2	21.01	19.7767	1.23333	0.425334
	WT/pDIJ_LB 7	20.82	19.32
	WT/pDIJ_LB 8	20.89	19.26
	WT/pDIJ_LB 9	20.915	19.22
	replicat bio 3	20.875	19.2667	1.60833	0.327977
	WT/pDIJ_LB 10	21.34	19.38
	WT/pDIJ_LB 11	20.96	19.65
	WT/pDIJ_LB 12	21	19.36
	replicat bio 4	21.1	19.4633	1.63667	0.321599
	WT/pDIJ_LB 13	21.27	19.4
	WT/pDIJ_LB 14	21.19	19.42
	WT/pDIJ_LB 15	21.2	19.53
	replicat bio 5	21.22	19.45	1.77	0.293209
	WT/pDIJ_LB 16	20.45	19.34
	WT/pDIJ_LB 17	20.67	19.35
	WT/pDIJ_LB 18	20.79	19.22
	replicat bio 6	20.6367	19.3033	1.33333	0.39685
Test 1	WT/pDIJ_TOB 1	20.76	22.06
	WT/pDIJ_TOB 2	20.7	22.05
	WT/pDIJ_TOB 3	20.93	22.71
	replicat bio 1	20.7967	22.2733	-1.47667	2.78305			-2.89667	7.44704
	WT/pDIJ_TOB 4	20.54	22.02
	WT/pDIJ_TOB 5	20.58	22.13
	WT/pDIJ_TOB 6	20.52	22.09
	replicat bio 2	20.5467	22.08	-1.53333	2.89454			-2.76667	6.80534
	WT/pDIJ_TOB 7	21.02	22.3
	WT/pDIJ_TOB 8	21.04	22.48
	WT/pDIJ_TOB 9	21.08	22.34
	replicat bio 3	21.0467	22.3733	-1.32667	2.50822			-2.935	7.64756
	WT/pDIJ_TOB 10	20.76	22.18
	WT/pDIJ_TOB 11	20.72	22.16
	WT/pDIJ_TOB 12	20.94	22.12
	replicat bio 4	20.8067	22.1533	-1.34667	2.54324			-2.98333	7.90811
	WT/pDIJ_TOB 13	20.89	22.04
	WT/pDIJ_TOB 14	21.03	22.08
	WT/pDIJ_TOB 15	20.88	22.06
	replicat bio 5	20.9333	22.06	-1.12667	2.18354			-2.89667	7.44704
	WT/pDIJ_TOB 16	21.42	22.78
	WT/pDIJ_TOB 17	21.38	22.85
	WT/pDIJ_TOB 18	21.32	22.83
	replicat bio 6	21.3733	22.82	-1.44667	2.72578			-2.78	6.86852

## Sheet: WT_pDIJ_MMC vs LB
		Target gene	HKG	ΔCt	2^-ΔCt	2^-ΔCt moy	SD 2^-ΔCt	ΔΔCt	Fold change
		sfiA	dxs						2^-ΔΔCt
Calibrator	WT/pDIJ_LB 1	20.92	19.65
	WT/pDIJ_LB 2	20.89	19.48
	WT/pDIJ_LB 3	20.92	19.34
	replicat bio 1	20.91	19.49	1.42	0.373712
	WT/pDIJ_LB 4	21.02	19.98
	WT/pDIJ_LB 5	21.09	19.7
	WT/pDIJ_LB 6	20.92	19.65
	replicat bio 2	21.01	19.7767	1.23333	0.425334
	WT/pDIJ_LB 7	20.82	19.32
	WT/pDIJ_LB 8	20.89	19.26
	WT/pDIJ_LB 9	20.915	19.22
	replicat bio 3	20.875	19.2667	1.60833	0.327977
	WT/pDIJ_LB 10	21.34	19.38
	WT/pDIJ_LB 11	20.96	19.65
	WT/pDIJ_LB 12	21	19.36
	replicat bio 4	21.1	19.4633	1.63667	0.321599
	WT/pDIJ_LB 13	21.27	22.1
	WT/pDIJ_LB 14	21.19	22.02
	WT/pDIJ_LB 15	21.2	22.03
	replicat bio 5	21.22	22.05	-0.83	1.77769
	WT/pDIJ_LB 16	20.45	21.57
	WT/pDIJ_LB 17	20.67	21.78
	WT/pDIJ_LB 18	20.79	21.78
	replicat bio 6	20.6367	21.71	-1.07333	2.10429
Test 1	WT/pDIJ_MMC 1	19.75	21.02
	WT/pDIJ_MMC 2	19.27	21.1
	WT/pDIJ_MMC 3	19.31	21.14
	replicat bio 1	19.4433	21.0867	-1.64333	3.12387			-3.06333	8.35902
	WT/pDIJ_MMC 4	19.36	20.86
	WT/pDIJ_MMC 5	19.52	20.92
	WT/pDIJ_MMC 6	19.38	20.78
	replicat bio 2	19.42	20.8533	-1.43333	2.7007			-2.66667	6.3496
	WT/pDIJ_MMC 7	19.73	20.88
	WT/pDIJ_MMC 8	19.15	20.82
	WT/pDIJ_MMC 9	19.39	20.89
	replicat bio 3	19.4233	20.8633	-1.44	2.71321			-3.04833	8.27256
	WT/pDIJ_MMC 10	19.48	20.76
	WT/pDIJ_MMC 11	19.52	20.68
	WT/pDIJ_MMC 12	19.32	20.64
	replicat bio 4	19.44	20.6933	-1.25333	2.38392			-2.89	7.4127
	WT/pDIJ_MMC 13	19.09	22.78
	WT/pDIJ_MMC 14	19.02	22.78
	WT/pDIJ_MMC 15	19.02	22.81
	replicat bio 5	19.0433	22.79	-3.74667	13.4233			-2.91667	7.55099
	WT/pDIJ_MMC 16	18.92	23.02
	WT/pDIJ_MMC 17	19.15	22.94
	WT/pDIJ_MMC 18	19.15	22.98
	replicat bio 6	19.0733	22.98	-3.90667	14.9977			-2.83333	7.12719

## Sheet: WT_pDIJ_pTOPO TOB vs LB
		Target gene	HKG	ΔCt	2^-ΔCt	2^-ΔCt moy	SD 2^-ΔCt	ΔΔCt	Fold change
		sfiA	dxs						2^-ΔΔCt
Calibrator	WT/DIJ_pTOPO_LB 1	20.92	19.65
	WT/DIJ_pTOPO_LB 2	20.89	19.48
	WT/DIJ_pTOPO_LB 3	20.92	19.34
	replicat bio 1	20.91	19.49	1.42	0.373712
	WT/DIJ_pTOPO_LB 4	21.02	19.98
	WT/DIJ_pTOPO_LB 5	21.09	19.7
	WT/DIJ_pTOPO_LB 6	20.92	19.65
	replicat bio 2	21.01	19.7767	1.23333	0.425334
	WT/DIJ-pTOPO_LB 7	20.82	19.32
	WT/DIJ-pTOPO_LB 8	20.89	19.26
	WT/DIJ-pTOPO_LB 9	20.915	19.22
	replicat bio 3	20.875	19.2667	1.60833	0.327977
	WT/DIJ_pTOPO_LB 10	21.52	19.38
	WT/DIJ_pTOPO_LB 11	21.46	19.53
	WT/DIJ_pTOPO_LB 12	21.49	19.43
	replicat bio 4	21.49	19.4467	2.04333	0.242603
	WT/DIJ_pTOPO_LB 13	20.99	19.42
	WT/DIJ_pTOPO_LB 14	20.94	19.37
	WT/DIJ_pTOPO_LB 15	21.02	19.45
	replicat bio 5	20.9833	19.4133	1.57	0.336808
	WT/DIJ_pTOPO_LB 16	21.12	19.56
	WT/DIJ_pTOPO_LB 17	21.09	19.34
	WT/DIJ_pTOPO_LB 18	21.08	19.36
	replicat bio 6	21.0967	19.42	1.67667	0.312805
Test 1	WT/DIJ_pTOPO_TOB 1	19.46	19.56
	WT/DIJ_pTOPO_TOB 2	19.59	19.69
	WT/DIJ_pTOPO_TOB 3	19.14	19.65
	replicat bio 1	19.3967	19.6333	-0.236667	1.17827			-1.65667	3.15287
	WT/DIJ_pTOPO_TOB 4	19.45	19.56
	WT/DIJ_pTOPO_TOB 5	19.47	19.68
	WT/DIJ_pTOPO_TOB 6	19.38	19.61
	replicat bio 2	19.4333	19.6167	-0.183333	1.1355			-1.41667	2.66968
	WT/DIJ_pTOPO_TOB 7	19.48	19.62
	WT/DIJ_pTOPO_TOB 8	19.22	19.64
	WT/DIJ_pTOPO_TOB 9	19.38	19.69
	replicat bio 3	19.36	19.65	-0.29	1.22264			-1.89833	3.72782
	WT/DIJ_pTOPO_TOB 10	19.18	19.52
	WT/DIJ_pTOPO_TOB 11	19.25	19.48
	WT/DIJ_pTOPO_TOB 12	19.37	19.27
	replicat bio 4	19.2667	19.4233	-0.156667	1.11471			-2.2	4.59479
	WT/DIJ_pTOPO_TOB 13	19.31	19.52
	WT/DIJ_pTOPO_TOB 14	19.27	19.48
	WT/DIJ_pTOPO_TOB 15	19.32	19.56
	replicat bio 5	19.3	19.52	-0.22	1.16473			-1.79	3.45815
	WT/DIJ_pTOPO_TOB 16	20.63	20.02
	WT/DIJ_pTOPO_TOB 17	19.43	19.97
	WT/DIJ_pTOPO_TOB 18	19.54	19.95
	replicat bio 6	19.8667	19.98	-0.113333	1.08172			-1.79	3.45815

## Sheet: WT_pDORF4_TOB vs LB
		Target gene	HKG	ΔCt	2^-ΔCt	2^-ΔCt moy	SD 2^-ΔCt	ΔΔCt	Fold change
		sfiA	dxs						2^-ΔΔCt
Calibrator	WT/delta orf4 LB_1	23.51	24.91
	WT/delta orf4 LB_2	23.51	24.88
	WT/delta orf4 LB_3	23.77	25.06
	replicat bio 1	23.5967	24.95	-1.35333	2.55502
	WT/delta orf4 LB_4	21.79	23.1
	WT/delta orf4 LB_5	21.52	23.29
	WT/delta orf4 LB_6	21.65	22.94
	replicat bio 2	21.6533	23.11	-1.45667	2.74473
	WT/delta orf4 LB_7	22.13	23.48
	WT/delta orf4 LB_8	21.03	23.48
	WT/delta orf4 LB_9	21.86	23.44
	replicat bio 3	21.6733	23.4667	-1.79333	3.46615
	WT/delta orf4 LB_10	22.82	23.48
	WT/delta orf4 LB_11	22.72	23.37
	WT/delta orf4 LB_12	22.56	23.56
	replicat bio 4	22.7	23.47	-0.77	1.70527
	WT/delta orf4 LB_13	21.75	23.09
	WT/delta orf4 LB_14	21.78	23.12
	WT/delta orf4 LB_15	21.71	23.05
	replicat bio 5	21.7467	23.0867	-1.34	2.53151
	WT/delta orf4 LB_16	21.46	23.42
	WT/delta orf4 LB_17	21.38	23.45
	WT/delta orf4 LB_18	21.67	23.18
	replicat bio 6	21.5033	23.35	-1.84667	3.59668
Test 1	WT/delta orf4 TOB_1	22.05	25.6
	WT/delta orf4 TOB_2	21.26	25.74
	WT/delta orf4 TOB_3	22.16	25.28
	replicat bio 1	21.8233	25.54	-3.71667	13.147			-2.36333	5.14558
	WT/delta orf4 TOB_4	22.06	25.78
	WT/delta orf4 TOB_5	21.86	26.04
	WT/delta orf4 TOB_6	22.16	25.65
	replicat bio 2	22.0267	25.8233	-3.79667	13.8967			-2.34	5.06303
	WT/delta orf4 TOB_7	22.42	25.56
	WT/delta orf4 TOB_8	22.28	25.13
	WT/delta orf4 TOB_9	22.04	25.12
	replicat bio 3	22.2467	25.27	-3.02333	8.13044			-1.23	2.34567
	WT/delta orf4 TOB_10	22.62	25.42
	WT/delta orf4 TOB_11	22.54	25.36
	WT/delta orf4 TOB_12	22.78	25.48
	replicat bio 4	22.6467	25.42	-2.77333	6.83686			-2.00333	4.00925
	WT/delta orf4 TOB_13	22.19	25.51
	WT/delta orf4 TOB_14	22.02	25.34
	WT/delta orf4 TOB_15	22.02	25.34
	replicat bio 5	22.0767	25.3967	-3.32	9.98664			-1.98	3.94493
	WT/delta orf4 TOB_16	21.42	25.25
	WT/delta orf4 TOB_17	21.44	25.78
	WT/delta orf4 TOB_18	21.76	25.13
	replicat bio 6	21.54	25.3867	-3.84667	14.3867			-2	4

## Sheet: WT_pDORF4_MMC vs LB
		Target gene	HKG	ΔCt	2^-ΔCt	2^-ΔCt moy	SD 2^-ΔCt	ΔΔCt	Fold change
		sfiA	dxs						2^-ΔΔCt
Calibrator	WT/delta orf4 LB_1	23.51	24.91
	WT/delta orf4 LB_2	23.51	24.88
	WT/delta orf4 LB_3	23.77	25.06
	replicat bio 1	23.5967	24.95	-1.35333	2.55502
	WT/delta orf4 LB_4	21.79	23.1
	WT/delta orf4 LB_5	21.52	23.29
	WT/delta orf4 LB_6	21.65	22.94
	replicat bio 2	21.6533	23.11	-1.45667	2.74473
	WT/delta orf4 LB_7	22.13	23.48
	WT/delta orf4 LB_8	21.03	23.48
	WT/delta orf4 LB_9	21.86	23.44
	replicat bio 3	21.6733	23.4667	-1.79333	3.46615
	WT/delta orf4 LB_10	22.82	23.48
	WT/delta orf4 LB_11	22.72	23.37
	WT/delta orf4 LB_12	22.56	23.56
	replicat bio 4	22.7	23.47	-0.77	1.70527
	WT/delta orf4 LB_13	21.75	23.09
	WT/delta orf4 LB_14	21.78	23.12
	WT/delta orf4 LB_15	21.71	23.05
	replicat bio 5	21.7467	23.0867	-1.34	2.53151
	WT/delta orf4 LB_16	21.46	23.42
	WT/delta orf4 LB_17	21.38	23.45
	WT/delta orf4 LB_18	21.67	23.18
	replicat bio 6	21.5033	23.35	-1.84667	3.59668
Test 1	WT/delta orf4 MMC_1	19.88	24.26
	WT/delta orf4 MMC_2	19.64	24.14
	WT/delta orf4 MMC_3	19.84	24.56
	replicat bio 1	19.7867	24.32	-4.53333	23.1563			-3.18	9.06307
	WT/delta orf4 MMC_4	19.04	24.18
	WT/delta orf4 MMC_5	18.9	24.23
	WT/delta orf4 MMC_6	19.18	24.1
	replicat bio 2	19.04	24.17	-5.13	35.0174			-3.67333	12.758
	WT/delta orf4 MMC_7	19.02	24.47
	WT/delta orf4 MMC_8	19.21	25.13
	WT/delta orf4 MMC_9	19.18	24.83
	replicat bio 3	19.1367	24.81	-5.67333	51.0321			-3.88	14.723
	WT/delta orf4 MMC_10	20.12	24.62
	WT/delta orf4 MMC_11	20.05	24.54
	WT/delta orf4 MMC_12	20.22	24.78
	replicat bio 4	20.13	24.6467	-4.51667	22.8903			-3.74667	13.4233
	WT/delta orf4 MMC_13	19.32	24.28
	WT/delta orf4 MMC_14	19.38	24.34
	WT/delta orf4 MMC_15	19.16	24.12
	replicat bio 5	19.2867	24.2467	-4.96	31.125			-3.62	12.295
	WT/delta orf4 MMC_16	19.12	24.87
	WT/delta orf4 MMC_17	19.17	24.12
	WT/delta orf4 MMC_18	19.38	24.12
	replicat bio 6	19.2233	24.37	-5.14667	35.4243			-3.3	9.84916

## Sheet: WT_pDORF4_pORF4_TOB vs LB
		Target gene	HKG	ΔCt	2^-ΔCt	2^-ΔCt moy	SD 2^-ΔCt	ΔΔCt	Fold change
		sfiA	dxs						2^-ΔΔCt
Calibrator	WT/delta orf4/pORF4 LB_1	23.41	25.02
	WT/delta orf4/pORF4 LB_2	23.52	24.84
	WT/delta orf4/pORF4 LB_3	23.78	25.06
	replicat bio 1	23.57	24.9733	-1.40333	2.64512
	WT/delta orf4/pORF4 LB_4	21.72	23.12
	WT/delta orf4/pORF4 LB_5	21.56	23.25
	WT/delta orf4/pORF4 LB_6	21.62	22.98
	replicat bio 2	21.6333	23.1167	-1.48333	2.79594
	WT/delta orf4/pORF4 LB_7	22.13	23.42
	WT/delta orf4/pORF4 LB_8	21.98	23.48
	WT/delta orf4/pORF4 LB_9	21.86	23.44
	replicat bio 3	21.99	23.4467	-1.45667	2.74473
	WT/delta orf4/pORF4 LB_10	22.76	23.5
	WT/delta orf4/pORF4 LB_11	22.72	23.42
	WT/delta orf4/pORF4 LB_12	22.58	23.53
	replicat bio 4	22.6867	23.4833	-0.796667	1.73708
	WT/delta orf4/pORF4_LB_13	22.47	23.75
	WT/delta orf4/pORF4_LB_14	22.06	23.34
	WT/delta orf4/pORF4_LB_15	22.17	23.45
	replicat bio 5	22.2333	23.5133	-1.28	2.42839
	WT/delta orf4/pORF4_LB_16	22.85	23.39
	WT/delta orf4/pORF4_LB_17	22.64	23.24
	WT/delta orf4/pORF4_LB_18	22.61	23.18
	replicat bio 6	22.7	23.27	-0.57	1.48452
Test 1	WT/delta orf4/pORF4 TOB_1	21.95	24.63
	WT/delta orf4/pORF4 TOB_2	21.34	24.52
	WT/delta orf4/pORF4 TOB_3	21.92	24.61
	replicat bio 1	21.7367	24.5867	-2.85	7.21			-1.44667	2.72578
	WT/delta orf4/pORF4 TOB_4	21.98	25.68
	WT/delta orf4/pORF4 TOB_5	22.04	25.92
	WT/delta orf4/pORF4 TOB_6	22.17	25.63
	replicat bio 2	22.0633	25.72	-3.65667	12.6115			-2.17333	4.51064
	WT/delta orf4/pORF4 TOB_7	22.27	25.24
	WT/delta orf4/pORF4 TOB_8	22.19	25.28
	WT/delta orf4/pORF4 TOB_9	22.02	25.12
	replicat bio 3	22.16	25.2133	-3.05333	8.30128			-1.59667	3.02444
	WT/delta orf4/pORF4 TOB_10	22.58	25.39
	WT/delta orf4/pORF4 TOB_11	22.49	25.29
	WT/delta orf4/pORF4 TOB_12	22.44	25.36
	replicat bio 4	22.5033	25.3467	-2.84333	7.17676			-2.04667	4.1315
	WT/delta orf4/pORF4_ TOB_13	22.12	25.22
	WT/delta orf4/pORF4_ TOB_14	22.14	25.24
	WT/delta orf4/pORF4_ TOB_15	22.68	25.78
	replicat bio 5	22.3133	25.4133	-3.1	8.57419			-1.82	3.53081
	WT/delta orf4/pORF4_ TOB_16	23.22	25.24
	WT/delta orf4/pORF4_ TOB_17	22.45	25.19
	WT/delta orf4/pORF4_ TOB_18	22.43	25.27
	replicat bio 6	22.7	25.2333	-2.53333	5.78908			-1.96333	3.89962

## Sheet: WT_pDORF4_pORF4_MMC vs LB
		Target gene	HKG	ΔCt	2^-ΔCt	2^-ΔCt moy	SD 2^-ΔCt	ΔΔCt	Fold change
		sfiA	dxs						2^-ΔΔCt
Calibrator	WT/delta orf4/pORF4 LB_1	23.41	25.02
	WT/delta orf4/pORF4 LB_2	23.52	24.84
	WT/delta orf4/pORF4 LB_3	23.78	25.06
	replicat bio 1	23.57	24.9733	-1.40333	2.64512
	WT/delta orf4/pORF4 LB_4	21.72	23.12
	WT/delta orf4/pORF4 LB_5	21.56	23.25
	WT/delta orf4/pORF4 LB_6	21.62	22.98
	replicat bio 2	21.6333	23.1167	-1.48333	2.79594
	WT/delta orf4/pORF4 LB_7	22.13	23.42
	WT/delta orf4/pORF4 LB_8	21.98	23.48
	WT/delta orf4/pORF4 LB_9	21.86	23.44
	replicat bio 3	21.99	23.4467	-1.45667	2.74473
	WT/delta orf4/pORF4 LB_10	22.76	23.5
	WT/delta orf4/pORF4 LB_11	22.72	23.42
	WT/delta orf4/pORF4 LB_12	22.58	23.53
	replicat bio 4	22.6867	23.4833	-0.796667	1.73708
	WT/delta orf4/pORF4_LB_13	22.47	23.75
	WT/delta orf4/pORF4_LB_14	22.06	23.34
	WT/delta orf4/pORF4_LB_15	22.17	23.45
	replicat bio 5	22.2333	23.5133	-1.28	2.42839
	WT/delta orf4/pORF4_LB_16	22.85	23.39
	WT/delta orf4/pORF4_LB_17	22.64	23.24
	WT/delta orf4/pORF4_LB_18	22.61	23.18
	replicat bio 6	22.7	23.27	-0.57	1.48452
Test 1	WT/delta orf4/pORF4_ MMC_1	19.94	24.36
	WT/delta orf4/pORF4_ MMC_2	19.78	24.27
	WT/delta orf4/pORF4_ MMC_3	19.82	24.49
	replicat bio 1	19.8467	24.3733	-4.52667	23.0495			-3.12333	8.71399
	WT/delta orf4/pORF4_ MMC_4	19.68	24.13
	WT/delta orf4/pORF4_ MMC_5	19.56	24.16
	WT/delta orf4/pORF4_ MMC_6	19.78	24.18
	replicat bio 2	19.6733	24.1567	-4.48333	22.3675			-3	8
	WT/delta orf4/pORF4_ MMC_7	19.84	24.52
	WT/delta orf4/pORF4_ MMC_8	19.88	24.87
	WT/delta orf4/pORF4_ MMC_9	19.78	24.92
	replicat bio 3	19.8333	24.77	-4.93667	30.6256			-3.48	11.1579
	WT/delta orf4/pORF4_ MMC_10	21.98	25.61
	WT/delta orf4/pORF4_ MMC_11	21.88	25.48
	WT/delta orf4/pORF4_ MMC_12	21.72	25.72
	replicat bio 4	21.86	25.6033	-3.74333	13.3923			-2.94667	7.70966
	WT/delta orf4/pORF4_ MMC_13	20.29	24.73
	WT/delta orf4/pORF4_ MMC_14	20.37	24.81
	WT/delta orf4/pORF4_ MMC_15	20.47	24.74
	replicat bio 5	20.3767	24.76	-4.38333	20.8696			-3.10333	8.59402
	WT/delta orf4/pORF4_ MMC_16	20.68	24.72
	WT/delta orf4/pORF4_ MMC_17	20.68	24.34
	WT/delta orf4/pORF4_ MMC_18	20.93	24.35
	replicat bio 6	20.7633	24.47	-3.70667	13.0562			-3.13667	8.7949
