# Supplementary material for: A qnr-plasmid allows aminoglycosides to induce SOS in Escherichia coli
Source: eLife. 2022 Jan 17;11:e69511. doi: 10.7554/eLife.69511 (PMC8789287; doi:10.7554/eLife.69511)
Supplement: Figure 5—source data 4. [file elife-69511-fig5-data4.xlsx]

## Sheet: NO
Strains	NO_1	NO_2	NO_3	NO_4	NO_5	NO_6	NO_7	NO_8	NO_9	Average
WT	8.545	9.187	9.045	9.475	9.065	9.07	8.545	9.02	9.62	9.06356
WT/pDIJ09-518a	12.463	17.066	13.091	13.62	13.42	12.31	13.114	13.651	14.134	13.6521
WT/pDIJ09-518a Δorf3	10.118	10.409	9.534	9.971	9.118	9.232	9.014	9.342	9.162	9.54444
WT/pDIJ09-518a Δorf4	10.918	11.271	10.462	9.726	9.118	10.671	11.289	11.465	11.895	10.7572
WT/pDIJ09-518a Δorf3 Δorf4	8.744	9.089	9.001	8.591	9.002	9.356	8.834	8.983	8.951	8.95011
