# Supplementary material for: A qnr-plasmid allows aminoglycosides to induce SOS in Escherichia coli
Source: eLife. 2022 Jan 17;11:e69511. doi: 10.7554/eLife.69511 (PMC8789287; doi:10.7554/eLife.69511)
Supplement: Figure 5—source data 5. [file elife-69511-fig5-data5.xlsx]

## Sheet: WT_pDIJ vs WT LB
		Target gene	HKG	ΔCt	2^-ΔCt	2^-ΔCt moy	SD 2^-ΔCt	ΔΔCt	Fold change
		hmp	dxs						2^-ΔΔCt
Calibrator	WT LB 1	24.97	22.9
	WT LB 2	25.1	22.79
	WT LB 3	25.1	22.89
	replicat bio 1	25.0567	22.86	2.19667	0.218141
	WT LB 4	24.81	23.57
	WT LB 5	24.82	23.53
	WT LB 6	24.57	23.13
	replicat bio 2	24.7333	23.41	1.32333	0.399611
	WT LB 7	24.85	22.9
	WT LB 8	25.02	22.79
	WT LB 9	25.12	22.89
	replicat bio 3	24.9967	22.86	2.13667	0.227405
	WT LB 10	24.83	23.57
	WT LB 11	24.82	23.53
	WT LB 12	24.82	23.13
	replicat bio 4	24.8233	23.41	1.41333	0.375443
	WT LB 13	24.9	23.14
	WT LB 14	24.88	23.16
	WT LB 15	24.87	23.06
	replicat bio 5	24.8833	23.12	1.76333	0.294567
	WT LB 16	24.22	23.65
	WT LB 17	24.78	23.63
	WT LB 18	24.76	23.46
	replicat bio 6	24.5867	23.58	1.00667	0.497695
Test 1	WT/pDIJ_LB 1	24.92	23.44
	WT/pDIJ_LB 2	24.92	22.71
	WT/pDIJ_LB 3	24.82	23.08
	replicat bio 1	24.8867	23.0767	1.81	0.285191			-0.386667	1.30737
	WT/pDIJ_LB 4	24.69	22.52
	WT/pDIJ_LB 5	24.64	22.86
	WT/pDIJ_LB 6	24.67	22.87
	replicat bio 2	24.6667	22.75	1.91667	0.264866			0.593333	0.66281
	WT/pDIJ_LB 7	24.73	23.44
	WT/pDIJ_LB 8	24.92	23.02
	WT/pDIJ_LB 9	24.82	23.08
	replicat bio 3	24.8233	23.18	1.64333	0.320116			-0.493333	1.40769
	WT/pDIJ_LB 10	24.69	22.52
	WT/pDIJ_LB 11	24.64	23.01
	WT/pDIJ_LB 12	24.67	22.87
	replicat bio 4	24.6667	22.8	1.86667	0.274206			0.453333	0.730353
	WT/pDIJ_LB 13	24.76	22.95
	WT/pDIJ_LB 14	24.7	22.98
	WT/pDIJ_LB 15	24.82	22.92
	replicat bio 5	24.76	22.95	1.81	0.285191			0.0466667	0.968171
	WT/pDIJ_LB 16	24.54	23.44
	WT/pDIJ_LB 17	24.35	23.46
	WT/pDIJ_LB 18	24.56	23.4
	replicat bio 6	24.4833	23.4333	1.05	0.482968			0.0433333	0.97041

## Sheet: WT_pDORF3 vs WT LB
		Target gene	HKG	ΔCt	2^-ΔCt	2^-ΔCt moy	SD 2^-ΔCt	ΔΔCt	Fold change
		hmp	dxs						2^-ΔΔCt
Calibrator	WT LB 1	21.43	22.91
	WT LB 2	21.63	22.82
	WT LB 3	21.67	22.57
	replicat bio 1	21.5767	22.7667	-1.19	2.28153
	WT LB 4	24.07	23.27
	WT LB 5	24.33	23.28
	WT LB 6	24.28	22.95
	replicat bio 2	24.2267	23.1667	1.06	0.479632
	WT LB 7	21.63	22.71
	WT LB 8	21.83	22.82
	WT LB 9	21.37	22.77
	replicat bio 3	21.61	22.7667	-1.15667	2.22942
	WT LB 10	24.12	23.34
	WT LB 11	24.14	23.18
	WT LB 12	24.26	23.08
	replicat bio 4	24.1733	23.2	0.973333	0.509328
	WT LB 13	24.03	23.01
	WT LB 14	24.13	23.14
	WT LB 15	24.12	23.14
	replicat bio 5	24.0933	23.0967	0.996667	0.501157
	WT LB 16	24.57	23.76
	WT LB 17	24.46	23.43
	WT LB 18	24.36	23.34
	replicat bio 6	24.4633	23.51	0.953333	0.516438
Test 1	WT/delta orf3 LB_1	22.6	22.97
	WT/delta orf3 LB_2	22.91	23.08
	WT/delta orf3 LB_3	22.44	22.93
	replicat bio 1	22.65	22.9933	-0.343333	1.26868			0.846667	0.556068
	WT/delta orf3 LB_4	22.38	21.69
	WT/delta orf3 LB_5	22.45	21.66
	WT/delta orf3 LB_6	22.34	21.54
	replicat bio 2	22.39	21.63	0.76	0.590496			-0.3	1.23114
	WT/delta orf3 LB_7	21.76	22.11
	WT/delta orf3 LB_8	21.6	22.11
	WT/delta orf3 LB_9	21.74	21.87
	replicat bio 3	21.7	22.03	-0.33	1.25701			0.826667	0.56383
	WT/delta orf3 LB_10	23.78	23.24
	WT/delta orf3 LB_11	23.66	23.14
	WT/delta orf3 LB_12	23.92	23.17
	replicat bio 4	23.7867	23.1833	0.603333	0.658231			-0.37	1.29235
	WT/delta orf3 LB_13	24.08	22.74
	WT/delta orf3 LB_14	23.98	22.78
	WT/delta orf3 LB_15	24.05	22.82
	replicat bio 5	24.0367	22.78	1.25667	0.41851			0.26	0.835088
	WT/delta orf3 LB_16	24.56	23.48
	WT/delta orf3 LB_17	24.64	23.35
	WT/delta orf3 LB_18	24.54	23.29
	replicat bio 6	24.58	23.3733	1.20667	0.433269			0.253333	0.838956

## Sheet: WT_pDORF4 vs WT LB
		Target gene	HKG	ΔCt	2^-ΔCt	2^-ΔCt moy	SD 2^-ΔCt	ΔΔCt	Fold change
		hmp	dxs						2^-ΔΔCt
Calibrator	WT LB 1	24.16	22.92
	WT LB 2	24.11	23.46
	WT LB 3	24.27	23.07
	replicat bio 1	24.18	23.15	1.03	0.48971
	WT LB 4	24.21	22.97
	WT LB 5	24.16	23.52
	WT LB 6	24.32	23.12
	replicat bio 2	24.23	23.2033	1.02667	0.490843
	WT LB 7	24.36	22.92
	WT LB 8	24.32	23.46
	WT LB 9	24.24	23.07
	replicat bio 3	24.3067	23.15	1.15667	0.448548
	WT LB 10	24.12	22.92
	WT LB 11	24.12	23.46
	WT LB 12	24.16	23.07
	replicat bio 4	24.1333	23.15	0.983333	0.50581
	WT LB 13	24.57	23.76
	WT LB 14	24.34	23.56
	WT LB 15	24.32	23.52
	replicat bio 5	24.41	23.6133	0.796667	0.575678
	WT LB 16	24.2	23.97
	WT LB 17	24.17	23.76
	WT LB 18	24.18	23.98
	replicat bio 6	24.1833	23.9033	0.28	0.823591
Test 1	WT/delta orf4 LB_1	22.81	25.27
	WT/delta orf4 LB_2	22.95	24.07
	WT/delta orf4 LB_3	23.01	23.37
	replicat bio 1	22.9233	24.2367	-1.31333	2.48515			-2.34333	5.07474
	WT/delta orf4 LB_4	24.22	25.82
	WT/delta orf4 LB_5	24.06	25.93
	WT/delta orf4 LB_6	24.04	25.36
	replicat bio 2	24.1067	25.7033	-1.59667	3.02444			-2.62333	6.16172
	WT/delta orf4 LB_7	22.84	25.27
	WT/delta orf4 LB_8	22.82	24.07
	WT/delta orf4 LB_9	22.92	23.37
	replicat bio 3	22.86	24.2367	-1.37667	2.59668			-2.53333	5.78908
	WT/delta orf4 LB_10	24.12	25.82
	WT/delta orf4 LB_11	24.06	25.93
	WT/delta orf4 LB_12	24.04	25.36
	replicat bio 4	24.0733	25.7033	-1.63	3.09513			-2.61333	6.11916
	WT/delta orf4 LB_13	22.35	24.26
	WT/delta orf4 LB_14	22.37	24.05
	WT/delta orf4 LB_15	22.56	24.16
	replicat bio 5	22.4267	24.1567	-1.73	3.31728			-2.52667	5.76239
	WT/delta orf4 LB_16	22.68	25.14
	WT/delta orf4 LB_17	22.73	25.03
	WT/delta orf4 LB_18	23.08	25.07
	replicat bio 6	22.83	25.08	-2.25	4.75683			-2.53	5.77572

## Sheet: WT_pDORF4_pORF4 vs WT LB
		Target gene	HKG	ΔCt	2^-ΔCt	2^-ΔCt moy	SD 2^-ΔCt	ΔΔCt	Fold change
		hmp	dxs						2^-ΔΔCt
Calibrator	WT LB 1	23.14	25.11
	WT LB 2	22.96	25.52
	WT LB 3	23.24	25.05
	replicat bio 1	23.1133	25.2267	-2.11333	4.3269
	WT LB 4	22.16	24.91
	WT LB 5	22.14	24.94
	WT LB 6	22.34	24.85
	replicat bio 2	22.2133	24.9	-2.68667	6.43824
	WT LB 7	21.89	24.73
	WT LB 8	21.89	24.52
	WT LB 9	22.01	24.7
	replicat bio 3	21.93	24.65	-2.72	6.58873
	WT LB 10	22.82	24.56
	WT LB 11	22.78	24.53
	WT LB 12	22.56	24.38
	replicat bio 4	22.72	24.49	-1.77	3.41054
	WT LB 13	22.42	24.81
	WT LB 14	22.43	24.75
	WT LB 15	22.42	24.74
	replicat bio 5	22.4233	24.7667	-2.34333	5.07474
	WT LB 16	22.05	24.24
	WT LB 17	22.12	24.25
	WT LB 18	22.14	24.56
	replicat bio 6	22.1033	24.35	-2.24667	4.74585
Test 1	WT/delta orf4/pORF4_ LB_1	22.57	24.94
	WT/delta orf4/pORF4_ LB_2	22.72	25.14
	WT/delta orf4/pORF4_ LB_3	22.63	25.08
	replicat bio 1	22.64	25.0533	-2.41333	5.32704			-0.3	1.23114
	WT/delta orf4/pORF4_ LB_4	24.93	26.84
	WT/delta orf4/pORF4_ LB_5	24.92	26.34
	WT/delta orf4/pORF4_ LB_6	24.98	26.54
	replicat bio 2	24.9433	26.5733	-1.63	3.09513			1.05667	0.480742
	WT/delta orf4/pORF4_ LB_7	22.12	23.54
	WT/delta orf4/pORF4_ LB_8	22.1	23.62
	WT/delta orf4/pORF4_ LB_9	21.89	23.62
	replicat bio 3	22.0367	23.5933	-1.55667	2.94173			1.16333	0.44648
	WT/delta orf4/pORF4_ LB_10	24.58	25.48
	WT/delta orf4/pORF4_ LB_11	24.32	25.82
	WT/delta orf4/pORF4_ LB_12	24.32	25.38
	replicat bio 4	24.4067	25.56	-1.15333	2.22427			0.616667	0.652176
	WT/delta orf4/pORF4_ LB_13	23.94	25.62
	WT/delta orf4/pORF4_ LB_14	23.76	25.61
	WT/delta orf4/pORF4_ LB_15	23.88	25.48
	replicat bio 5	23.86	25.57	-1.71	3.27161			0.633333	0.644685
	WT/delta orf4/pORF4_ LB_16	23.56	25.15
	WT/delta orf4/pORF4_ LB_17	23.57	25.19
	WT/delta orf4/pORF4_ LB_18	23.63	25.27
	replicat bio 6	23.5867	25.2033	-1.61667	3.06666			0.63	0.646176

## Sheet: WT_pDORF3_pDORF4 vs WT LB
		Target gene	HKG	ΔCt	2^-ΔCt	2^-ΔCt moy	SD 2^-ΔCt	ΔΔCt	Fold change
		hmp	dxs						2^-ΔΔCt
Calibrator	WT LB 1	22.9	22.85
	WT LB 2	22.93	22.76
	WT LB 3	22.9	22.66
	replicat bio 1	22.91	22.7567	0.153333	0.899171
	WT LB 4	24.43	23.26
	WT LB 5	24.22	23.54
	WT LB 6	24.23	23.52
	replicat bio 2	24.2933	23.44	0.853333	0.553504
	WT LB 7	22.94	22.78
	WT LB 8	22.84	23.25
	WT LB 9	22.88	22.75
	replicat bio 3	22.8867	22.9267	-0.04	1.02811
	WT LB 10	23.18	23.46
	WT LB 11	23.22	23.25
	WT LB 12	23.16	23.67
	replicat bio 4	23.1867	23.46	-0.273333	1.2086
	WT LB 13	22.98	22.98
	WT LB 14	22.97	23.15
	WT LB 15	23.07	23.12
	replicat bio 5	23.0067	23.0833	-0.0766667	1.05458
	WT LB 16	23.14	22.87
	WT LB 17	23.16	22.84
	WT LB 18	23.09	22.84
	replicat bio 6	23.13	22.85	0.28	0.823591
Test 1	WT/ΔORF3/ΔORF4 LB_1	23.58	23.02
	WT/ΔORF3/ΔORF4 LB_2	23.22	22.91
	WT/ΔORF3/ΔORF4 LB_3	23.44	22.64
	replicat bio 1	23.4133	22.8567	0.556667	0.679871			0.403333	0.756109
	WT/ΔORF3/ΔORF4 LB_4	23.02	23.03
	WT/ΔORF3/ΔORF4 LB_5	23.02	23.08
	WT/ΔORF3/ΔORF4 LB_6	23.12	22.68
	replicat bio 2	23.0533	22.93	0.123333	0.918064			-0.73	1.65864
	WT/ΔORF3/ΔORF4 LB_7	23.44	23.02
	WT/ΔORF3/ΔORF4 LB_8	23.23	23.1
	WT/ΔORF3/ΔORF4 LB_9	23.51	22.88
	replicat bio 3	23.3933	23	0.393333	0.761368			0.433333	0.740549
	WT/ΔORF3/ΔORF4 LB_10	23.02	21.08
	WT/ΔORF3/ΔORF4 LB_11	23.09	21.17
	WT/ΔORF3/ΔORF4 LB_12	22.98	21.18
	replicat bio 4	23.03	21.1433	1.88667	0.270431			2.16	0.223756
	WT/ΔORF3/ΔORF4 LB_13	25.1	24.56
	WT/ΔORF3/ΔORF4 LB_14	25.12	24.87
	WT/ΔORF3/ΔORF4 LB_15	25.15	24.46
	replicat bio 5	25.1233	24.63	0.493333	0.710382			0.57	0.673617
	WT/ΔORF3/ΔORF4 LB_16	25.79	25.01
	WT/ΔORF3/ΔORF4 LB_17	25.07	24.56
	WT/ΔORF3/ΔORF4 LB_18	25.7	24.46
	replicat bio 6	25.52	24.6767	0.843333	0.557354			0.563333	0.676737
