# Supplementary material for: A qnr-plasmid allows aminoglycosides to induce SOS in Escherichia coli
Source: eLife. 2022 Jan 17;11:e69511. doi: 10.7554/eLife.69511 (PMC8789287; doi:10.7554/eLife.69511)
Supplement: Figure 6—source data 1. [file elife-69511-fig6-data1.xlsx]

## Sheet: cip
	LB	0.003	0.006	0.125	0.5	1	1.5	2	2.5
ATCC-TOB	2200000000	2190000000	1920000000	0	0	0	0	0	0
	4160000000	3120000000	2160000000	0	0	0	0	0	0
	1760000000	2560000000	2960000000	0	0	0	0	0	0
ATCC+TOB	4900000000	720000000	650000000	0	0	0	0	0	0
	4300000000	1200000000	1320000000	0	0	0	0	0	0
	4800000000	2640000000	1280000000	0	0	0	0	0	0
ATCC/pDIJ-TOB	4720000000	1700000000	1720000000	1600000000	18000	0	0	0	0
	2460000000	4480000000	5760000000	120000000	10000	0	0	0	0
	2380000000	1840000000	2940000000	1120000000	228000	0	0	0	0
ATCC/pDIJ+TOB	3120000000	3280000000	1840000000	1520000000	176000	20000	0	0	0
	3130000000	3280000000	1840000000	40000000	322000	24000	0	0	0
	3140000000	3360000000	2720000000	340000000	576000	34000	20	0	0
ATCC-TOB	2.70667e+09	2.62333e+09	2.34667e+09	0	0	0	0	0	0
	9.43243	9.41885	9.37045
ATCC+TOB	4.66667e+09	1520000000	1.08333e+09	0	0	0	0	0	0
	9.66901	9.18184	9.03476
ATCC/pDIJ-TOB	3.18667e+09	2.67333e+09	3.47333e+09	9.46667e+08	85333.3	0	0	0	0
	9.50334	9.42705	9.54075	8.9762	4.93112
ATCC/pDIJ+TOB	3130000000	3.30667e+09	2.13333e+09	6.33333e+08	358000	26000	6.66667	0	0
	9.49554	9.51939	9.32906	8.80163	5.55388	4.41497	0.823909

## Sheet: levo
	LB	0.003	0.006	0.125	0.5	1	1.5	2	2.5
ATCC-TOB	2450000000	0	0	0	0	0	0	0	0
	2140000000	0	0	0	0	0	0	0	0
ATCC+TOB	2400000000	0	0	0	0	0	0	0	0
	3250000000	0	0	0	0	0	0	0	0
ATCC/pDIJ-TOB	2590000000	1700000000	2060000000	2300000000		0	0	0	0
	2130000000	1940000000	2060000000	2300000000		0	0	0	0
ATCC/pDIJ+TOB	3070000000	2470000000	2100000000	2440000000	2100000	0	0	0	0
	2270000000	2470000000	2100000000	2440000000	5500000	0	0	0	0
	log10
ATCC-TOB	9.38917	0	0	0	0	0	0	0	0
	9.33041	0	0	0	0	0	0	0	0
ATCC+TOB	9.38021	0	0	0	0	0	0	0	0
	9.51188	0	0	0	0	0	0	0	0
ATCC/pDIJ-TOB	9.4133	9.23045	9.31387	9.36173	0	0	0	0	0
	9.32838	9.2878	9.31387	9.36173	0	0	0	0	0
ATCC/pDIJ+TOB	9.48714	9.3927	9.32222	9.38739	6.32222	0	0	0	0
	9.35603	9.3927	9.32222	9.38739	6.74036	0	0	0	0
	mean
ATCC-TOB	9.35979	0	0	0	0	0	0	0	0
ATCC+TOB	9.44605	0	0	0	0	0	0	0	0
ATCC/pDIJ-TOB	9.37084	9.25913	9.31387	9.36173	0	0	0	0	0
ATCC/pDIJ+TOB	9.42158	9.3927	9.32222	9.38739	6.53129	0	0	0	0
	SD
ATCC-TOB	0.0415442	0	0	0	0	0	0	0	0
ATCC+TOB	0.0931062	0	0	0	0	0	0	0	0
ATCC/pDIJ-TOB	0.0600476	0.0405546	0	0	0	0	0	0	0
ATCC/pDIJ+TOB	0.0927106	0	0	0	0.295672	0	0	0	0

## Sheet: oflo
	LB	0.003	0.006	0.125	0.5	1	1.5	2	2.5
ATCC-TOB	2450000000	820000000	0	0	0	0	0	0	0
	2140000000	790000000	0	0	0	0	0	0	0
ATCC+TOB	2400000000	100000	0	0	0	0	0	0	0
	3250000000	100000	0	0	0	0	0	0	0
ATCC/pDIJ-TOB	2590000000	2690000000	320000000	1600000000	1780000000	0	0	0	0
	2130000000	2150000000	2950000000	120000000	178000000		0	0	0
ATCC/pDIJ+TOB	3120000000	3280000000	1840000000	1520000000	2090000000	13000	0	0	0
	3130000000	3280000000	1840000000	3100000000	209000000	2050	0	0	0
	log10
ATCC-TOB	9.38917	8.91381	0	0	0	0	0	0	0
	9.33041	8.89763	0	0	0	0	0	0	0
ATCC+TOB	9.38021	5	0	0	0	0	0	0	0
	9.51188	5	0	0	0	0	0	0	0
ATCC/pDIJ-TOB	9.4133	9.42975	8.50515	9.20412	9.25042	0	0	0	0
	9.32838	9.33244	9.46982	8.07918	8.25042	0	0	0	0
ATCC/pDIJ+TOB	9.49415	9.51587	9.26482	9.18184	9.32015	4.11394	0	0	0
	9.49554	9.51587	9.26482	9.49136	8.32015	3.31175	0	0	0
	mean
ATCC-TOB	9.35979	8.90572	0	0	0	0	0	0	0
ATCC+TOB	9.44605	5	0	0	0	0	0	0	0
ATCC/pDIJ-TOB	9.37084	9.3811	8.98749	8.64165	8.75042	0	0	0	0
ATCC/pDIJ+TOB	9.49485	9.51587	9.26482	9.3366	8.82015	3.71285	0	0	0
	SD
ATCC-TOB	0.0415442	0.0114458	0	0	0	0	0	0	0
ATCC+TOB	0.0931062	0	0	0	0	0	0	0	0
ATCC/pDIJ-TOB	0.0600476	0.0688113	0.682126	0.795452	0.707107	0	0	0	0
ATCC/pDIJ+TOB	0.000982697	0	0	0.218862	0.707107	0.567234	0	0	0
